# Supplementary material for: Stereoselective tandem synthesis of thiazolo fused naphthyridines and thienopyridines from o-alkynylaldehydes via Au(iii)-catalyzed regioselective 6-endo-dig ring closure
Source: Royal Society of Chemistry journal article supplement (doi:10.1039/c3ob42035c), 2013-11-11

## Supporting Information

### Stereoselective tandem synthesis of thiazolo fused naphthyridines and thienopyridines from *o*-alkynylaldehydes via Au(III)-catalyzed regioselective 6-*endo-dig* ring closure

Rajeev R. Jha, Rakesh K. Saunthwal and Akhilesh K. Verma\*

*Synthetic Organic Chemistry Laboratory, Department of Chemistry, University of Delhi, Delhi, 110007, India.*

*E-mail:* [averma@acbr.du.ac.in](mailto:averma@acbr.du.ac.in)

| S. No. |                                                                                                              | Page No. |
|--------|--------------------------------------------------------------------------------------------------------------|----------|
| 1.     | General                                                                                                      | S2-S2    |
| 2.     | Synthesis of 2-alkynylaldehyde <b>1a–o</b> , <b>2</b> , <b>3a–e</b>                                          | S2-S9    |
| 3.     | Synthesis of Thiazolo-fused-naphthyridine <b>5a–o</b> , Isoquinoline <b>6</b> , Thieno-pyridines <b>8a–e</b> | S9-S21   |
| 4.     | NOESY data of <b>5a</b>                                                                                      | S22-S22  |
| 4.     | References                                                                                                   | S23-S23  |
| 5.     | Copies of <sup>1</sup> H, <sup>13</sup> C NMR and NOESY                                                      | S23-S111 |

**General Method:**  $^1\text{H}$  NMR (300 MHz, 400 MHz) and  $^{13}\text{C}$  NMR (75 MHz, 100 MHz) spectra were recorded in  $\text{CDCl}_3$ . Chemical shifts for carbons are reported in ppm from tetramethylsilane and are referenced to the carbon resonance of the solvent. Data are reported as follows: chemical shift, multiplicity (s=singlet, d=doublet, t=triplet, q=quartet, m=multiplet, dd = doublet of doublet), coupling constants in Hertz, and integration. High-resolution mass spectra were recorded on electrospray mass spectrometer. Crystal structure analysis was accomplished on single crystal X-ray diffractometer. TLC analysis was performed on commercially prepared 60  $\text{F}_{254}$  silica gel plates and visualized by either UV irradiation or by staining with  $\text{I}_2$ . All purchased chemicals were used as received. All melting points are uncorrected. The specific rotations were measured with Rudolph autopol II automatic polarimeter using light of 546 nm wavelength.

**General Procedure for the Synthesis of *o*-Alkanylaldehyde 1a–o, 2, 3a–e.** The *o*-alkanyl aldehyde **1a–o**, **2a–e** was readily prepared by coupling reaction of corresponding *o*-halo aldehyde with terminal alkynes using reported procedures.<sup>1</sup> The structure and purity of known starting materials were confirmed by comparison of their physical and spectral data ( $^1\text{H}$  NMR,  $^{13}\text{C}$  NMR, and HRMS) with those reported in literature.

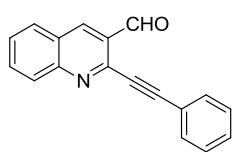

**2-(Phenylethynyl)quinoline-3-carbaldehyde (1a).**<sup>1a</sup> The product was

obtained as a white solid;  $^1\text{H}$  NMR (300 MHz,  $\text{CDCl}_3$ )  $\delta$  : 10.8 (s, 1H), 8.75 (s, 1H), 8.81 (d,  $J$  = 8.4 Hz, 1H), 7.97 (d,  $J$  = 8.1 Hz, 1H), 7.87 (td,  $J$  = 1.5 Hz, 1H), 7.72–7.61 (m, 3H), 7.48–7.42 (m, 3H);  $^{13}\text{C}$  NMR ( $\text{CDCl}_3$ )  $\delta$ : 190.81, 150.18, 143.91, 137.17, 133.07, 132.33, 129.88, 129.68, 129.34, 128.84, 128.62, 128.26, 126.44, 121.35, 95.55, 85.55. HRMS Calcd for  $\text{C}_{18}\text{H}_{11}\text{NO}$  ( $\text{M}+\text{H}^+$ ): 257.0841, found: 257.0852.

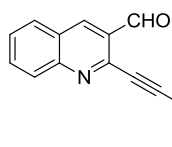

**2-(p-Tolylethynyl)quinoline-3-carbaldehyde(1b).**<sup>1a</sup> The product was obtained as a white solid; <sup>1</sup>H NMR (300 MHz, CDCl<sub>3</sub>) δ: 10.78 (s, 1H), 8.71 (s, 1H), 8.15 (d, *J* = 8.7 Hz, 1H), 7.91 (d, *J* = 8.1 Hz, 1H), 7.85–7.79 (d, *J* = 8.4 Hz, 1H), 7.60–7.53 (m, 3H), 7.19–7.15 (m, 2H), 2.34 (s, 3H); <sup>13</sup>C NMR (75 MHz, CDCl<sub>3</sub>) δ: 190.9, 150.2, 144.1, 140.4, 137.1, 133.0, 132.3, 129.7, 129.4, 129.3, 128.8, 128.1, 126.4, 118.3, 96.0, 85.1, 21.7. HRMS Calcd for C<sub>19</sub>H<sub>13</sub>NO (M+H<sup>+</sup>): 271.0997, found: 271.0979.

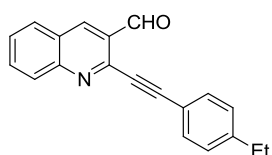

**2-((4-Ethylphenyl)ethynyl)quinoline-3-carbaldehyde(1c).**<sup>1a</sup> This compound was obtained as a light brown solid; <sup>1</sup>H NMR (400 MHz, CDCl<sub>3</sub>) δ: 10.78 (s, 1H), 8.71 (s, 1H), 8.14 (d, *J* = 8.7 Hz, 1H), 7.93 (d, *J* = 8.0 Hz, 1H), 7.83 (t, *J* = 7.3 Hz, 1H), 7.61–7.57 (m, 3H), 7.25–7.21 (m, 2H), 2.67 (q, *J* = 7.3 Hz, 2H), 1.24 (t, *J* = 7.3 Hz, 3H); <sup>13</sup>C NMR (100 MHz, CDCl<sub>3</sub>) δ: 190.9, 150.1, 146.5, 144.1, 137.0, 132.9, 132.3, 129.6, 129.2, 128.7, 128.1, 128.1, 126.3, 118.4, 96.0, 85.0, 28.9, 15.2. HRMS Calcd for C<sub>20</sub>H<sub>15</sub>NO (M+H<sup>+</sup>): 285.1154, found: 285.1154.

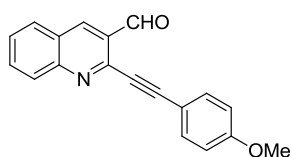

**2-((4-Methoxyphenyl)ethynyl)quinoline-3-carbaldehyde (1d).**<sup>1a</sup> The product was obtained as a orange solid; <sup>1</sup>H NMR (300 MHz, CDCl<sub>3</sub>) δ: 10.80 (s, 1H), 8.73 (s, 1H), 8.16 (d, *J* = 8.4 Hz, 1H), 7.96–7.83 (m, 2H), 7.66–7.59 (m, 3H), 6.95–6.83 (m, 2H), 3.86 (s, 3H); <sup>13</sup>C NMR (75 MHz, CDCl<sub>3</sub>) δ: 190.9, 160.9, 150.2, 144.2, 137.0, 134.0, 132.9, 129.6, 129.2, 128.7, 128.0, 126.3, 114.3, 113.3, 96.1, 84.2, 55.4. HRMS Calcd for C<sub>19</sub>H<sub>13</sub>NO<sub>2</sub> (M+H<sup>+</sup>): 287.0946, found: 287.0951.

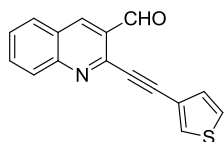

**2-(Thiophen-3-ylethynyl)quinoline-3-carbaldehyde(1e).<sup>1a</sup>** The

product was obtained as a white solid; <sup>1</sup>H NMR (300 MHz, CDCl<sub>3</sub>) δ: 10.78 (s, 1H), 7.97 (d, *J* = 8.4 Hz, 1H), 7.88 (t, *J* = 1.5 Hz, 1H), 7.79–7.78 (m, 1H), 7.63 (t, *J* = 0.9 Hz, 1H), 7.39–7.33 (m, 2H); <sup>13</sup>C NMR (75 MHz, CDCl<sub>3</sub>) δ: 190.8, 150.2, 143.9, 137.2, 133.1, 131.6, 130.0, 129.7, 129.3, 128.8, 128.2, 126.4, 126.0, 120.5, 90.8, 85.4. HRMS Calcd for C<sub>16</sub>H<sub>9</sub>NOS (M+H<sup>+</sup>): 263.0405, found: 263.0450.

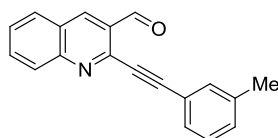

**2-(*m*-Tolyethynyl)quinoline-3-carbaldehyde(1f).<sup>1a</sup>** The product

was obtained as a orange solid; <sup>1</sup>H NMR (300 MHz, CDCl<sub>3</sub>) δ :10.81 (s, 1H), 8.74 (s, 1H), 8.17 (d, *J* = 8.7 Hz, 1H), 7.96 (d, *J* = 8.1 Hz, 1H), 7.87 (t, *J* = 7.2 Hz, 1H), 7.63 (t, *J* = 7.2 Hz, 1H), 7.51 (d, *J* = 7.8 Hz, 2H), 7.33–7.24 (m, 2H); <sup>13</sup>C NMR (75 MHz, CDCl<sub>3</sub>) δ: 190.9, 150.2, 144.0, 138.4, 137.1, 133.0, 132.9, 130.8, 129.7, 129.4, 129.3, 128.8, 128.5, 128.2, 126.4, 121.1, 95.9, 85.2, 21.2. HRMS Calcd for C<sub>19</sub>H<sub>13</sub>NO (M+H<sup>+</sup>): 271.0997, found: 271.0970.

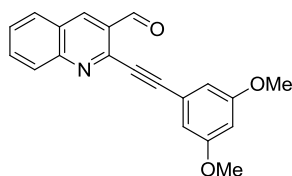

**2-((3,5-Dimethoxyphenyl)ethynyl)quinoline-3-carbaldehyde(1g).<sup>1b</sup>**

The product was obtained as a orange solid; <sup>1</sup>H NMR (300 MHz, CDCl<sub>3</sub>) δ: 10.8 (s, 1H), 8.76 (s, 1H), 8.18 (d, *J* = 7.8 Hz, 1H), 7.99–7.86 (m, 2H), 7.64 (t, *J* = 7.3 Hz, 1H), 6.85 (s, 2H), 6.56 (s, 1H), 3.83 (s, 6H); <sup>13</sup>C NMR (75 MHz, CDCl<sub>3</sub>) δ: 190.9, 160.8, 150.3, 143.9, 137.3, 133.2, 129.8, 129.4, 128.9, 128.4, 126.6, 122.6, 110.1, 103.6, 95.6, 85.1, 55.7. HRMS (ESI) Calcd for C<sub>20</sub>H<sub>15</sub>NO<sub>3</sub> (M+H<sup>+</sup>) 317.1052, found 317.1060.

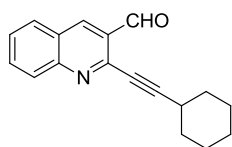

**2-(Cyclohexylethynyl)quinoline-3-carbaldehyde (1h).**<sup>1b</sup> The product was

obtained as a white solid; <sup>1</sup>H NMR (300 MHz, CDCl<sub>3</sub>) δ: 10.70 (s, 1H), 8.69 (s, 1H), 8.12 (d, *J* = 8.7 Hz, 1H), 7.93 (d, *J* = 8.1 Hz, 1H), 7.86–7.80 (m, 1H), 7.58 (td, *J* = 0.9 and 7.9 Hz, 1H), 2.80–2.75 (m, 1H), 2.02–1.97 (m, 2H), 1.82–1.55 (m, 5H), 1.47–1.36 (m, 3H); <sup>13</sup>C NMR (75 MHz, CDCl<sub>3</sub>) δ: 191.4, 150.1, 144.6, 136.8, 132.8, 129.6, 129.2, 128.8, 127.9, 126.2, 102.0, 77.5, 32.1, 29.9, 25.7, 24.9. HRMS (ESI) Calcd for C<sub>18</sub>H<sub>17</sub>NO (*M*+H<sup>+</sup>) 263.1310, found 263.1311.

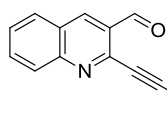

**2-(Cyclopropylethynyl)quinoline-3-carbaldehyde (1i).**<sup>1c</sup> The product was

obtained as a white solid; <sup>1</sup>H NMR (400 MHz, CDCl<sub>3</sub>) δ: 10.65 (s, 1H), 8.67 (s, 1H), 8.10 (s, 1H), 7.92–7.73 (m, 2H), 7.59 (s, 1H), 1.63–1.62 (m, 1H), 1.14–1.02 (m, 4H); <sup>13</sup>C NMR (100 MHz, CDCl<sub>3</sub>) δ: 191.2, 150.1, 144.4, 136.8, 132.8, 129.6, 129.1, 128.8, 127.8, 126.2, 101.4, 72.8, 9.2, 0.4. HRMS (ESI) Calcd for C<sub>15</sub>H<sub>11</sub>NO (*M*+H<sup>+</sup>) 221.0841, found 221.0842.

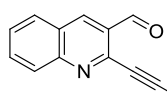

**2-(Hex-1-yn-1-yl)quinoline-3-carbaldehyde (1j).**<sup>1b</sup> The product was

obtained as a yellow oil; <sup>1</sup>H NMR (300 MHz, CDCl<sub>3</sub>) δ: 10.68 (s, 1H), 8.68 (s, 1H), 8.11 (d, *J* = 8.4 Hz, 1H), 7.93–7.80 (m, 2H), 7.61–7.56 (m, 2H), 2.59 (t, *J* = 7.2 Hz, 2H), 1.73–1.66 (m, 2H), 1.57–1.47 (m, 2H), 0.97 (t, *J* = 7.2 Hz, 3H); <sup>13</sup>C NMR (75 MHz, CDCl<sub>3</sub>) δ: 191.0, 150.1, 144.5, 136.8, 131.8, 129.6, 129.2, 128.7, 127.9, 126.2, 98.1, 87.8, 30.2, 22.2, 19.4, 13.6. HRMS (ESI) Calcd for C<sub>16</sub>H<sub>15</sub>NO (*M*+H<sup>+</sup>) 237.1154, found 237.1162.

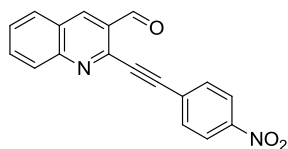

**2-((4-Nitrophenyl)ethynyl)quinoline-3-carbaldehyde (1k).**<sup>1a</sup>

The product was obtained as a yellow solid; <sup>1</sup>H NMR (400 MHz, CDCl<sub>3</sub>) δ: 10.71 (s, 1H), 8.76 (s, 1H), 8.26 (d, *J* = 8.8 Hz, 2H), 8.17 (d, *J* = 8.8 Hz, 1H), 7.98 (d, *J* = 8.0 Hz, 1H), 7.91–7.87 (m, 1H), 7.83 (d, *J* = 8.0 Hz, 2H), 7.66 (t, *J* = 8.0 Hz, 1H); <sup>13</sup>C NMR (100 MHz, CDCl<sub>3</sub>) δ: 189.9, 150.0, 147.9, 142.4, 137.9, 133.4, 133.1, 132.6, 129.6, 129.4, 128.9, 128.8, 128.1, 126.6, 123.8, 92.3, 89.8. HRMS (ESI) Calcd for C<sub>18</sub>H<sub>10</sub>N<sub>2</sub>O<sub>3</sub> (M+H<sup>+</sup>) 302.0691, found 302.0692.

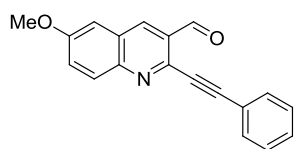

**6-Methoxy-2-(phenylethynyl)quinoline-3-carbaldehyde (1l).**<sup>1a</sup>

The product was obtained as a yellow solid; <sup>1</sup>H NMR (300 MHz, CDCl<sub>3</sub>) δ: 10.78 (s, 1H), 8.61 (s, 1H), 8.06 (d, *J* = 9.3 Hz, 1H), 7.70–7.67 (m, 2H), 7.52–7.41 (m, 4H), 7.17 (d, *J* = 2.7 Hz, 1H), 3.96 (s, 3H); <sup>13</sup>C NMR (75 MHz, CDCl<sub>3</sub>): 191.0, 159.0, 146.6, 141.5, 135.3, 132.2, 130.8, 129.7, 129.1, 128.6, 127.7, 126.3, 121.6, 106.2, 94.7, 85.6, 55.8. HRMS (ESI) Calcd for C<sub>19</sub>H<sub>13</sub>NO<sub>2</sub> (M+H<sup>+</sup>) 287.0946, found 287.0947.

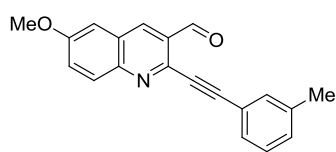

**6-Methoxy-2-(*m*-tolylethynyl)quinoline-3-carbaldehyde (1m).**<sup>1a</sup>

This compound was obtained as a yellow solid; <sup>1</sup>H NMR (400 MHz, CDCl<sub>3</sub>) δ: 10.78 (s, 1H), 8.61 (s, 1H), 8.07 (d, *J* = 9.5 Hz, 1H), 7.51–7.47 (m, 3H), 7.30–7.24 (m, 2H), 7.16 (d, *J* = 2.2 Hz, 1H), 3.95 (s, 3H), 2.37 (s, 3H); <sup>13</sup>C NMR (100 MHz, CDCl<sub>3</sub>) δ: 191.0, 159.5, 146.4, 141.5, 138.3, 135.4, 132.8, 130.6, 129.3, 128.4, 127.8, 126.4, 121.1, 106.2, 85.1, 55.8, 21.2. HRMS (ESI) Calcd for C<sub>20</sub>H<sub>15</sub>NO<sub>2</sub> (M+H<sup>+</sup>) 301.1103, found: 301.1103.

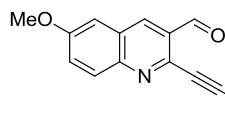

**2-(Cyclopropylethynyl)-6-methoxyquinoline-3-carbaldehyde (1n).**

The product was obtained as a yellow needles (DCM/Ether), mp: 181–182 °C :  $^1\text{H}$  NMR (400 MHz,  $\text{CDCl}_3$ )  $\delta$ : 10.6 (s, 1H), 8.45 (s, 1H), 7.91 (d,  $J = 9.16$  Hz, 1H), 7.39 (d,  $J = 8.24$  Hz, 1H), 7.04 (s, 1H), 3.88 (s, 3H), 1.57–1.53 (m, 1H), 0.95–0.93 (m, 4H);  $^{13}\text{C}$  NMR (100 MHz,  $\text{CDCl}_3$ )  $\delta$ : 191.3, 158.5, 146.3, 141.8, 134.9, 130.4, 128.8, 127.2, 126.0, 106.0, 100.2, 55.6, 9.0, 0.2. HRMS Calcd for  $\text{C}_{16}\text{H}_{13}\text{NO}_2$  ( $\text{M}+\text{H}^+$ ): 251.0946, found 251.0947

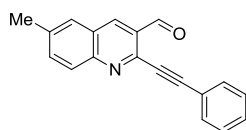

**6-Methyl-2-(phenylethynyl)quinoline-3-carbaldehyde (1o).**<sup>1d</sup> The

product was obtained as a yellow solid;  $^1\text{H}$  NMR (400 MHz,  $\text{CDCl}_3$ )  $\delta$ : 10.80 (s, 1H), 8.65 (s, 1H), 8.07 (d,  $J = 8.8$  Hz, 1H), 7.71–7.70 (m, 4H), 7.51–7.41 (m, 4H), 7.37–7.24 (m, 3H), 2.57 (s, 3H);  $^{13}\text{C}$  NMR (100 MHz,  $\text{CDCl}_3$ )  $\delta$ : 190.9, 148.9, 143.0, 138.6, 136.3, 135.5, 132.3, 129.7, 129.0, 128.9, 128.6, 128.3, 126.5, 121.5, 95.1, 85.6, 21.7. HRMS Calcd for  $\text{C}_{19}\text{H}_{13}\text{NO}$  ( $\text{M}+\text{H}^+$ ): 271.0997, found 271.0998.

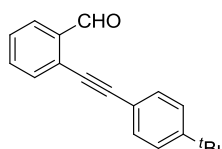

**2-((4-(tert-Butyl)phenyl)ethynyl)benzaldehyde (2).**<sup>1e</sup> This compound was

obtained as a off white solid;  $^1\text{H}$  NMR (400 MHz,  $\text{CDCl}_3$ )  $\delta$ : 10.65 (s, 1H), 7.93 (d,  $J = 6.84$  Hz, 1H), 7.63–7.61 (m, 1H), 7.55 (t,  $J = 6.88$  Hz, 1H), 7.51–7.49 (m, 2H), 7.43–7.38 (m, 3H), 1.33 (s, 9H);  $^{13}\text{C}$  NMR (100 MHz,  $\text{CDCl}_3$ )  $\delta$ : 191.6, 152.4, 135.7, 133.7, 133.1, 128.3, 127.1, 127.0, 125.5, 119.2, 96.6, 84.2, 34.8, 31.0. HRMS Calcd for  $\text{C}_{19}\text{H}_{18}\text{O}$  ( $\text{M}+\text{H}^+$ ): 262.1358, found: 262.1359.

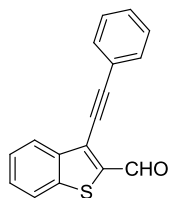

**3-(Phenylethynyl)benzo[b]thiophene-2-carbaldehyde(3a).**<sup>1a</sup> This compound

was obtained as a yellow brown solid; <sup>1</sup>H NMR (400 MHz, CDCl<sub>3</sub>) δ: 10.40 (s, 1H), 8.10–8.08 (m, 1H), 7.82 (d, *J* = 7.3 Hz, 1H), 7.59–7.56 (m, 2H), 7.51–7.43 (m, 2H), 7.37–7.33 (m, 3H); <sup>13</sup>C NMR (100 MHz, CDCl<sub>3</sub>) δ: 180.9, 139.9, 137.5, 135.8, 128.4, 126.0, 125.3, 125.1, 124.2, 122.1, 121.5, 119.8, 118.3, 95.5, 77.0. HRMS Calcd for C<sub>17</sub>H<sub>10</sub>OS (M+H<sup>+</sup>): 262.0452, found: 262.0451

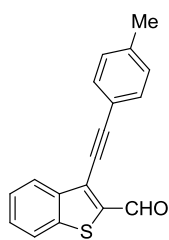

**3-(p-Tolylethynyl)benzo[b]thiophene-2-carbaldehyde (3b).** The product was

obtained as a yellow needles (DCM/Ether), mp: 177–179 °C : <sup>1</sup>H NMR (400 MHz, CDCl<sub>3</sub>) δ: 10.4 (s, 1H), 8.14 (d, *J* = 7.8 Hz, 1H), 7.87–7.85 (m, 1H), 7.56–7.48 (m, 4H), 7.23 (d, *J* = 8.24 Hz, 2H), 2.41 (s, 3H); <sup>13</sup>C NMR (100 MHz, CDCl<sub>3</sub>) δ: 184.6, 143.0, 140.7, 139.6, 139.2, 131.8, 129.3, 128.8, 125.5, 125.1, 123.2, 118.7, 99.4, 80.0, 21.5. HRMS Calcd for C<sub>18</sub>H<sub>12</sub>OS (M+H<sup>+</sup>): 276.0609, found 276.0608.

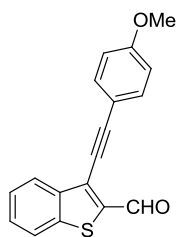

**3-((4-Methoxyphenyl)ethynyl)benzo[b]thiophene-2-carbaldehyde (3c):**<sup>1f</sup>

The product was obtained as a yellow solid; <sup>1</sup>H NMR (400 MHz, CDCl<sub>3</sub>) δ: 10.43 (s, 1H), 8.12 (dd, *J* = 2.2, 8.1 Hz, 1H), 7.85 (d, *J* = 7.3 Hz, 1H), 7.57–7.49 (m, 4H), 6.93–6.91 (m, 2H), 3.84 (s, 3H); <sup>13</sup>C NMR (100 MHz, CDCl<sub>3</sub>) δ: 184.6, 160.6, 142.7, 141.1, 139.4, 133.5,



128.8, 128.3, 125.5, 125.1, 123.3, 114.3, 113.8, 99.4, 79.6, 55.4. HRMS Calcd for  $C_{18}H_{12}O_2SNa$  ( $M+Na^+$ ): 315.0456, found: 315.0457.

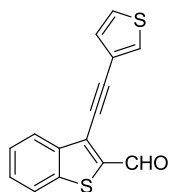

**3-(Thiophen-3-ylethynyl)benzo[b]thiophene-2-carbaldehyde (3d).**<sup>1a</sup> This

compound was obtained as yellow solid;  $^1H$  NMR (400 MHz,  $CDCl_3$ ):  $\delta$  10.41 (s, 1H), 8.12–8.10 (m, 1H), 7.86–7.84 (m, 1H), 7.69–7.67 (m, 1H), 7.53–7.48 (m, 2H), 7.37–7.35 (m, 1H), 7.28–7.27 (m, 1H);  $^{13}C$  NMR (100 MHz,  $CDCl_3$ ):  $\delta$  183.6, 143.0, 140.5, 138.9, 130.2, 129.3, 128.3, 127.0, 125.6, 125.1, 124.5, 122.8, 120.5, 93.6, 79.7. HRMS Calcd for  $C_{15}H_8OS_2$  ( $M+H^+$ ): 268.0017, found 268.0017.

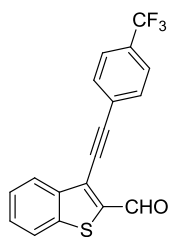

**3-((4-(Trifluoromethyl)phenyl)ethynyl)benzo[b]thiophene-2-carbaldehyde**

**(3e).**<sup>1a</sup> This compound was obtained as a dark brown solid;  $^1H$  NMR (400 MHz,  $CDCl_3$ )  $\delta$ : 10.40 (s, 1H), 8.09–8.07 (m, 1H), 7.84 (d,  $J = 7.3$  Hz, 1H), 7.69 (d,  $J = 8.0$  Hz, 2H), 7.62 (d,  $J = 8.8$  Hz, 2H), 7.53–7.45 (m, 2H);  $^{13}C$  NMR (100 MHz,  $CDCl_3$ )  $\delta$ : 184.1, 144.2, 141.0, 139.2, 132.2, 129.0, 126.6, 125.8, 125.60, 125.57, 124.9, 123.4, 97.1, 82.6. HRMS Calcd for  $C_{18}H_9F_3OS$  ( $M+H^+$ ): 330.0326, found 330.0326.

### General procedure for the synthesis of Benzo[b] thiazolo[2,3-f][1,6]naphthyridine 5a–o.

An oven-dried Schlenk tube with a Teflon screw valve was charged with 1.1 equiv of *L*(-)-Cysteine methyl ester hydrochloride **4**, EDC (2.0 mL), 0.5 mmol of the 2-alkanylaldehyde **1a–o**, **2**, **3a–e**, and  $AuCl_3$  (10 mol %). The reaction mixture was heated to 80 °C until 2-alkanylaldehyde **1a–o**, **2**, **3a–e** had been completely consumed (as determined by TLC) and was allowed to cool to room temperature. The reaction mixture was diluted with ethyl acetate

(10 mL) and water (15 mL). Organic layer was concentrated under reduced pressure. The crude material so obtained was purified by column chromatography on silica gel.

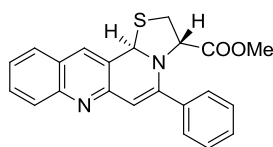

**(3*S*,12*bR*)-methyl 5-phenyl-3,12*b*-dihydro-2*H*-benzo[*b*]thiazolo[2,3-*f*][1,6]naphthyridine-3-carboxylate (5a).** The product was obtained as a yellow needles (DCM/Ether), mp: 177–179 °C;  $[\alpha]_D^{27.5} = -357.0$  (c 0.1, MeOH):  $^1\text{H}$  NMR (400 MHz,  $\text{CDCl}_3$ )  $\delta$ : 8.23 (s, 1H), 8.08 (d,  $J = 8.8$  Hz, 1H), 7.77 (d,  $J = 8.0$  Hz, 1H), 7.74–7.71 (m, 2H), 7.67 (t,  $J = 8.0$  Hz, 1H), 7.51 (t,  $J = 8.0$  Hz, 1H), 7.39–7.37 (m, 4H), 6.39 (s, 1H), 4.29–4.27 (m, 1H), 3.82 (s, 3H), 3.36–3.32 (m, 1H), 3.12–3.08 (m, 1H);  $^{13}\text{C}$  NMR (100 MHz,  $\text{CDCl}_3$ )  $\delta$ : 172.0, 147.1, 142.5, 137.8, 132.2, 131.1, 129.8, 129.3, 128.9, 128.4, 127.7, 127.3, 126.9, 121.9, 96.4, 87.4, 67.4, 64.9, 52.7, 37.7. HRMS Calcd for  $\text{C}_{22}\text{H}_{18}\text{N}_2\text{O}_2\text{S}$  ( $\text{M}+\text{H}^+$ ): 374.1089, found 374.1088.

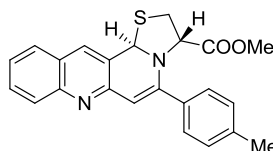

**(3*S*,12*bR*)-methyl 5-(*p*-tolyl)-3,12*b*-dihydro-2*H*-benzo[*b*]thiazolo[2,3-*f*][1,6]naphthyridine-3-carboxylate (5b).** The product was obtained as a yellow needles (DCM/Ether), mp: 173–175 °C;  $[\alpha]_D^{27} = -317.1$  (c 0.1, MeOH):  $^1\text{H}$  NMR (400 MHz,  $\text{CDCl}_3$ )  $\delta$ : 8.69 (s, 1H), 8.13 (d,  $J = 8.8$  Hz, 1H), 7.96 (d,  $J = 8.0$  Hz, 1H), 7.80 (td,  $J = 6.6$  and 1.5 Hz, 1H), 7.57 (t,  $J = 8.0$  Hz, 1H), 6.88–6.83 (m, 4H), 6.51 (s, 1H), 5.84 (s, 1H), 5.55 (td,  $J = 5.1$  and 1.5 Hz, 1H), 3.69 (s, 3H), 3.54–3.49 (m, 1H), 3.32–3.27 (m, 1H), 2.17 (s, 3H);  $^{13}\text{C}$  NMR (100 MHz,  $\text{CDCl}_3$ )  $\delta$ : 193.3, 162.8, 161.9, 149.8, 136.5, 135.3, 134.8, 132.4, 131.7, 129.9, 129.8, 129.3, 129.2, 128.9, 127.8, 127.3, 127.2, 70.0, 52.6, 37.3, 21.0. HRMS Calcd for  $\text{C}_{23}\text{H}_{20}\text{N}_2\text{O}_2\text{S}$  ( $\text{M}+\text{H}^+$ ): 388.1245, found 388.1244.

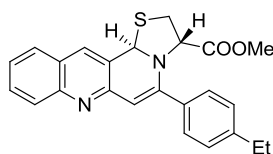

**(3*S*,12*b*R)-Methyl-5-(4-ethylphenyl)-3,12*b*-dihydro-2H-benzo[*b*]thiazolo[2,3-*f*][1,6]naphthyridine-3-carboxylate (5c).** The product was obtained as a yellow needles (DCM/Ether), mp: 155–157 °C;  $[\alpha]_D^{27} = -289.6$  (c 0.1, MeOH):  $^1\text{H}$  NMR (400 MHz,  $\text{CDCl}_3$ )  $\delta$ : 8.23 (s, 1H), 8.11–8.09 (m, 1H), 7.81–7.76 (m, 1H), 7.72–7.68 (m, 1H), 7.66–7.63 (m, 2H), 7.58 (d,  $J = 7.8$  Hz, 1H), 7.55–7.48 (m, 1H), 7.21–7.18 (m, 2H), 6.37 (s, 1H), 4.27 (t,  $J = 6.9$  Hz, 1H), 3.81 (s, 3H), 3.33–3.31 (m, 1H), 3.11–3.07 (m, 1H), 2.66 (q,  $J = 6.9$  Hz, 2H), 1.22 (t,  $J = 7.3$  Hz, 3H);  $^{13}\text{C}$  NMR (100 MHz,  $\text{CDCl}_3$ )  $\delta$ : 172.0, 146.1, 146.0, 137.8, 134.0, 132.2, 131.2, 130.4, 129.8, 128.8, 128.7, 127.5, 128.0, 127.7, 127.3, 126.9, 119.0, 67.4, 64.9, 52.7, 37.8, 28.9, 15.2. HRMS Calcd for  $\text{C}_{24}\text{H}_{22}\text{N}_2\text{O}_2\text{S}$  ( $\text{M}+\text{H}^+$ ): 402.1402, found 402.1403.

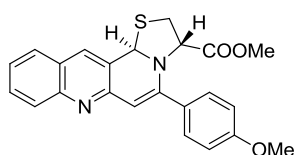

**(3*S*,12*b*R)-Methyl-5-(4-methoxyphenyl)-3,12*b*-dihydro-2H-benzo[*b*]thiazolo[2,3-*f*][1,6]naphthyridine-3-carboxylate (5d).** The product was obtained as a yellow needles (DCM/Ether), mp: 171–172 °C;  $[\alpha]_D^{27} = -319.4$  (c 0.1, MeOH):  $^1\text{H}$  NMR (300 MHz,  $\text{CDCl}_3$ )  $\delta$ : 8.75 (s, 1H), 8.20 (d,  $J = 8.4$  Hz, 1H), 8.02 (d,  $J = 8.1$  Hz, 1H), 7.87 (t,  $J = 7.2$  Hz, 1H), 7.64 (t,  $J = 7.5$  Hz, 1H), 6.93 (d,  $J = 8.4$  Hz, 2H), 6.68–6.60 (m, 3H), 5.93 (s, 1H), 5.60 (t,  $J = 5.4$  Hz, 1H), 3.77 (s, 3H), 3.72 (s, 3H), 3.58–3.52 (m, 1H), 3.40–3.33 (m, 1H);  $^{13}\text{C}$  NMR (75 MHz,  $\text{CDCl}_3$ )  $\delta$ : 193.3, 162.8, 161.9, 158.5, 149.8, 135.4, 134.7, 131.7, 130.5, 130.0, 129.8, 129.2, 127.9, 127.4, 127.1, 113.6, 70.0, 55.1, 52.6, 36.8. HRMS Calcd for  $\text{C}_{23}\text{H}_{20}\text{N}_2\text{O}_3\text{S}$  ( $\text{M}+\text{H}^+$ ): 404.1195, found 404.1195.

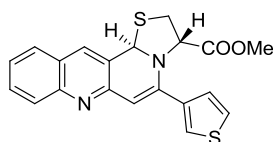

**(3S,12bR)-Methyl-5-(thiophen-3-yl)-3,12b-dihydro-2H-**

**benzo[b]thiazolo[2,3-f][1,6]naphthyridine-3-carboxylate (5e).** The product was obtained as a yellow needles (DCM/Ether), mp: 159–161 °C;  $[\alpha]_D^{30} = -276.7$  (c 0.1, MeOH):  $^1\text{H}$  NMR (400 MHz,  $\text{CDCl}_3$ )  $\delta$ : 8.22 (d,  $J = 3.2$  Hz, 1H), 8.05 (d,  $J = 8.2$  Hz, 1H), 7.77–7.74 (m, 2H), 7.66–7.63 (m, 1H), 7.51–7.48 (m, 1H), 7.36–7.34 (m, 1H), 7.31–7.28 (m, 1H), 6.36–6.33 (m, 1H), 4.27–4.25 (m, 1H), 3.79 (s, 3H), 3.34–3.30 (m, 1H), 3.24–3.22 (m, 1H), 3.11–3.05 (m, 1H);  $^{13}\text{C}$  NMR (100 MHz,  $\text{CDCl}_3$ )  $\delta$ : 172.0, 147.1, 142.6, 137.6, 131.2, 131.0, 129.9, 129.8, 128.8, 127.6, 127.3, 126.9, 125.5, 121.1, 91.8, 87.1, 67.4, 64.8, 52.7, 37.7. HRMS Calcd for  $\text{C}_{20}\text{H}_{16}\text{N}_2\text{O}_2\text{S}_2$  ( $\text{M}+\text{H}^+$ ): 380.0653, found 380.0654.

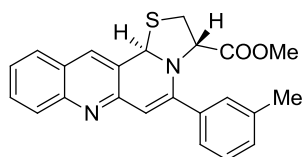

**(3S,12bR)-Methyl-5-(*m*-tolyl)-3,12b-dihydro-2H**

**benzo[b]thiazolo[2,3-f][1,6]naphthyridine-3-carboxylate (5f).** The product was obtained as a yellow needles (DCM/Ether), mp: 172–174 °C;  $[\alpha]_D^{27} = -319.1$  (c 0.1, MeOH):  $^1\text{H}$  NMR (400 MHz,  $\text{CDCl}_3$ )  $\delta$ : 8.24 (s, 1H), 8.10 (d,  $J = 7.68$  Hz, 1H), 7.83–7.78 (m, 1H), 7.73–7.67 (m, 1H), 7.56–7.49 (m, 4H), 7.30–7.26 (m, 1H), 7.22–7.20 (m, 1H), 6.41 (s, 1H), 4.30 (t,  $J = 6.2$  Hz, 1H), 3.84 (s, 3H), 3.38–3.34 (m, 1H), 3.14–3.09 (m, 1H), 2.37 (s, 3H);  $^{13}\text{C}$  NMR (100 MHz,  $\text{CDCl}_3$ )  $\delta$ : 172.2, 147.1, 142.6, 138.1, 137.8, 134.0, 132.6, 131.1, 130.3, 129.7, 129.3, 128.8, 128.2, 127.6, 127.3, 126.9, 121.7, 96.7, 87.1, 67.4, 64.9, 52.7, 37.8, 21.0. HRMS Calcd for  $\text{C}_{23}\text{H}_{20}\text{N}_2\text{O}_2\text{S}$  ( $\text{M}+\text{H}^+$ ): 388.1245, found 388.1247.

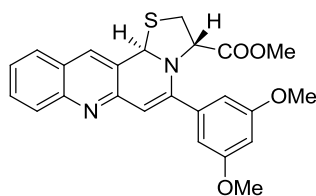

**(3S,12bR)-Methyl-5-(3,5-dimethoxyphenyl)-3,12b-dihydro-2H-**

**benzo[*b*]thiazolo[2,3-*f*][1,6]naphthyridine-3-carboxylate (5g).** The product was obtained as a yellow needles (DCM/Ether), mp: 179–182 °C;  $[\alpha]_D^{27} = -325.1$  (c 0.1, MeOH):  $^1\text{H}$  NMR (400 MHz,  $\text{CDCl}_3$ )  $\delta$ : 8.16 (s, 1H), 7.99–7.97 (m, 1H), 7.68–7.66 (m, 1H), 7.59–7.55 (m, 1H), 7.44–7.40 (m, 2H), 6.80 (t,  $J = 2.28\text{Hz}$ , 1H), 6.74 (t,  $J = 2.28\text{Hz}$ , 1H), 6.40 (d,  $J = 2.28\text{Hz}$ , 1H), 6.28 (s, 1H), 4.19 (t,  $J = 5.96\text{ Hz}$ , 1H), 3.68 (s, 9H), 3.27–3.23 (m, 1H), 3.09–2.99 (m, 1H);  $^{13}\text{C}$  NMR (100 MHz,  $\text{CDCl}_3$ )  $\delta$ : 168.0, 156.49, 156.46, 143.1, 133.7, 127.3, 125.8, 124.7, 123.6, 123.4, 123.0, 119.1, 105.9, 98.2, 92.3, 82.9, 63.4, 60.8, 51.4, 48.6, 33.7, 25.6. HRMS Calcd for  $\text{C}_{24}\text{H}_{22}\text{N}_2\text{O}_4\text{S}$  ( $\text{M}+\text{H}^+$ ): 434.1300, found 434.1302

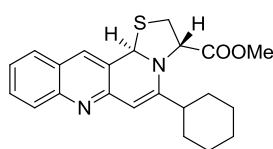

**(3S,12bR)-Methyl-5-cyclohexyl-3,12b-dihydro-2H-**

**benzo[*b*]thiazolo[2,3-*f*][1,6]naphthyridine-3-carboxylate(67:33)(Mixture) (dr=68:32) (5h).** The product was obtained as a yellow needles, mp: 161–163 °C;  $[\alpha]_D^{27} = -301.3$  (c 0.1, MeOH):  $^1\text{H}$  NMR (400 MHz,  $\text{CDCl}_3$ )  $\delta$ : 8.37 (s, 0.5H)(minor), 8.13 (s, 1H)(major), 8.05–8.00 (m, 1.7H)(major + minor), 7.77–7.72 (m, 1.7H) (major + minor), 7.67–7.60 (m, 1.7H) (major + minor), 7.50–7.44 (m, 1.8H) (major + minor), 6.26 (s, 1H) (major), 6.08 (s, 0.5H) (minor), 4.27–4.23 (m, 1H) (major), 4.04–4.02 (m, 0.5H) (minor), 3.81 (s, 3H) (major), 3.79 (s, 1.5H) (minor), 3.48–3.43 (m, 0.5H)(minor), 3.31–3.27 (m, 1H) (major), 3.15–3.10 (m, 0.6H) (minor), 3.08–3.05 (m, 1H) (major), 2.74–2.69 (m, 1.6H) (major + minor), 1.98–1.92 (m, 3H) (major + minor), 1.79–1.76 (m, 3H) (major + minor), 1.67–1.62 (m, 3H) (major + minor);  $^{13}\text{C}$  NMR (100 MHz,  $\text{CDCl}_3$ )  $\delta$ : 172.1, 171.5, 147.5, 146.9, 143.2, 143.1, 137.6, 133.8, 133.2, 133.2, 130.8, 130.1, 129.5, 128.8, 128.7, 127.6, 127.1, 126.9, 126.7, 102.7,

100.7, 79.1, 78.7, 68.6, 67.5, 65.7, 64.8, 52.7, 52.6, 38.7, 37.5, 32.0, 30.0, 29.9, 25.7, 25.0, 24.9. HRMS Calcd for C<sub>22</sub>H<sub>24</sub>N<sub>2</sub>O<sub>2</sub>S (M+H<sup>+</sup>): 380.1558, found 380.1559.

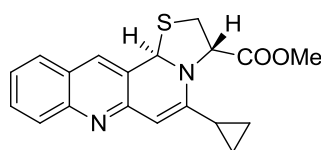

**(3S,12bR)-Methyl-5-cyclopropyl-3,12b-dihydro-2H-benzo[*b*]**

**thiazolo[2,3-*f*][1,6]naphthyridine-3-carboxylate (5i).** The product was obtained as a yellow needles (DCM/Ether), mp: 162–165 °C; [ $\alpha$ ]<sub>D</sub><sup>27.5</sup> = -275.0 (c 0.1, MeOH): <sup>1</sup>H NMR (400 MHz, CDCl<sub>3</sub>)  $\delta$ : 8.17 (s, 1H), 8.02 (d, *J* = 8.76 Hz, 1H), 7.75 (d, *J* = 8.04 Hz, 1H), 7.67–7.63 (m, 1H), 7.51–7.47 (m, 1H), 6.25 (s, 1H), 4.27 (t, *J* = 6.62 Hz, 1H), 3.84 (s, 3H), 3.33–3.30 (m, 1H), 3.10–3.06 (m, 1H), 1.60–1.58 (m, 1H), 1.04–0.96 (m, 4H); <sup>13</sup>C NMR (100 MHz, CDCl<sub>3</sub>)  $\delta$ : 172.0, 171.4, 147.5, 146.8, 142.9, 137.4, 134.0, 133.0, 132.9, 130.9, 130.2, 129.5, 128.6, 128.57, 127.6, 127.55, 127.1, 126.9, 126.6, 102.1, 100.2, 74.4, 74.0, 68.7, 67.4, 65.7, 64.8, 52.6, 52.57, 38.8, 37.6, 9.15, 9.1, 9.0, 8.8, 8.7, 0.4. HRMS Calcd for C<sub>19</sub>H<sub>18</sub>N<sub>2</sub>O<sub>2</sub>S (M+H<sup>+</sup>): 338.1089, found 388.1089

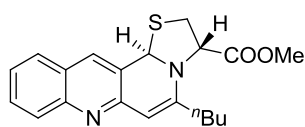

**(3S,12bR)-Methyl-5-butyl-3,12b-dihydro-2H-**

**benzo[*b*]thiazolo[2,3-*f*][1,6]naphthyridine-3-carboxylate (dr=67:33) (5j).** The product was obtained as a yellow needles, mp: 161–163 °C; [ $\alpha$ ]<sub>D</sub><sup>27</sup> = -301.3 (c 0.1, MeOH): <sup>1</sup>H NMR (400 MHz, CDCl<sub>3</sub>)  $\delta$ : 8.29 (s, 0.5H)(minor), 8.08 (s, 1H)(major), 7.98–7.93 (m, 1.5H)(major + minor), 7.83–7.79 (d, *J* = 12.84, 0.3H) (minor), 7.69–7.63 (m, 1.9H) (major + minor), 7.59–7.53 (m, 1.9H) (major + minor), 7.51–7.45 (m, 0.5H) (minor), 7.41–7.35 (m, 1.5H) (major + minor), 7.26–7.21 (m, 0.5H) (minor) 6.18 (s, 1H) (major), 5.97 (s, 0.4H) (minor), 4.19–4.16 (m, 1H) (major), 3.98–3.95 (m, 0.6H) (minor), 3.72–3.70 (m, 4.6H) (major + minor), 3.41–3.31 (m, 1H) (major), 3.24–3.19 (m, 1H) (major), 3.08–2.96 (m, 2H) (major + minor), 2.47–2.42 (q, *J* = 14.2 Hz, 7.32 Hz 2.8H) (major + minor) 1.61–1.53(m, 2.42H) (major + minor),

1.45–1.34 (m, 2.5H) (major + minor), 0.87–0.84 (m, 4H) (major + minor);  $^{13}\text{C}$  NMR (100 MHz,  $\text{CDCl}_3$ )  $\delta$ : 171.9, 171.3, 147.3, 146.7, 142.8, 137.4, 134.0, 132.8, 132.4, 130.9, 130.1, 129.4, 128.4, 127.4, 127.0, 126.8, 126.5, 124.8, 102.6, 98.8, 97.0, 78.9, 68.6, 67.2, 65.6, 64.6, 52.8, 52.5, 52.4, 38.7, 37.4, 30.0, 21.8, 19.3, 13.7, 13.4, 0.8. HRMS Calcd for  $\text{C}_{20}\text{H}_{22}\text{N}_2\text{O}_2\text{S}$  ( $\text{M}+\text{H}^+$ ): 354.1402, found 354.1401.

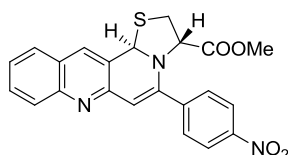

**(3S,12bR)-Methyl-5-(4-nitrophenyl)-3,12b-dihydro-2H**

**benzo[b]thiazolo[2,3-f][1,6]naphthyridine-3-carboxylate (5k).** The product was obtained as a yellow needles (DCM/Ether), mp: 178–180 °C;  $[\alpha]_{\text{D}}^{27.5} = -345.0$  (c 0.1, MeOH):  $^1\text{H}$  NMR (400 MHz,  $\text{CDCl}_3$ )  $\delta$ : 8.16–8.11 (m, 4H), 7.84 (d,  $J = 8.04$  Hz, 1H), 7.75–7.69 (m, 3H), 7.55 (t,  $J = 7.32$  Hz, 1H), 6.91 (s, 1H), 6.38 (s, 1H), 4.83 (d,  $J = 5.88$  Hz, 1H), 3.86 (s, 3H), 3.29–3.26 (m, 1H), 2.98–2.94 (m, 1H);  $^{13}\text{C}$  NMR (100 MHz,  $\text{CDCl}_3$ )  $\delta$ : 170.2, 154.0, 149.1, 147.0, 145.2, 143.3, 132.1, 130.6, 130.5, 130.3, 129.5, 128.8, 128.2, 127.2, 99.9, 70.3, 68.1, 53.1, 37.2, 35.9. HRMS Calcd for  $\text{C}_{22}\text{H}_{17}\text{N}_3\text{O}_4\text{S}$  ( $\text{M}+\text{H}^+$ ): 419.0940, found 419.0943.

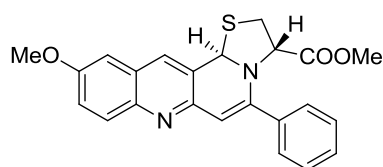

**(3S,12bR)-Methyl-10-methoxy-5-phenyl-3,12b-dihydro-2H-**

**benzo[b]thiazolo[2,3-f][1,6]naphthyridine-3-carboxylate (dr=67:33) (5l).** The product was obtained as a yellow needles (DCM/Ether), mp: 179–181 °C;  $[\alpha]_{\text{D}}^{27.5} = -355.0$  (c 0.1, MeOH):  $^1\text{H}$  NMR (400 MHz,  $\text{CDCl}_3$ )  $\delta$ : 8.25 (s, 0.5H) (minor), 8.07 (s, 1H) (major), 7.92 (t,  $J = 9.16$  Hz, 1.64H) (major + minor), 7.66–7.64 (m, 2H) (major + minor), 7.60–7.58 (m, 1.2H) (major + minor), 7.33–7.29 (m, 5H) (major + minor), 7.28–7.24 (m, 1H) (major + minor), 6.99–6.96 (m, 1.5H) (major + minor), 6.30 (s, 1H) (major), 6.07 (s, 0.4H) (minor), 4.22 (t,  $J = 7.08$  Hz, 1H) (major), 4.06–4.02 (m, 0.5H) (minor), 3.84 (s, 1.5H) (minor), 3.82 (m,

3H) (major), 3.75(s, 3H) (major), 3.72(s, 1.4H) (minor), 3.45–3.41 (m, 1H) (major + minor), 3.45–3.41 (m, 1H) (major + minor), 3.31–3.26 (m, 1H) (major + minor), 3.11–3.00 (m, 2H) (major + minor);  $^{13}\text{C}$  NMR (100 MHz,  $\text{CDCl}_3$ )  $\delta$ : 169.2, 168.8, 155.73, 155.70, 141.2, 140.3, 137.0, 135.4, 131.0, 130.0, 129.4, 127.6, 127.4, 126.5, 125.5, 120.6, 120.0, 119.3, 102.4, 102.2, 93.0, 84.7, 65.8, 64.7, 63.0, 62.2, 58.9, 52.8, 49.9, 36.1, 35.1. HRMS Calcd for  $\text{C}_{23}\text{H}_{20}\text{N}_2\text{O}_3\text{S}$  ( $\text{M}+\text{H}^+$ ): 404.1195, found 404.1195.

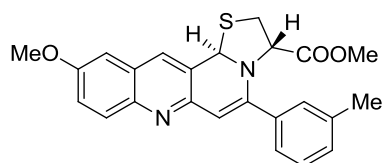

**(3S,12bR)-Methyl-10-methoxy-5-(*m*-tolyl)-3,12b-dihydro-**

**2H-benzo[*b*]thiazolo[2,3-*f*][1,6]naphthyridine-3-carboxylate (dr=62:38) (5m).** The product was obtained as a yellow needles (DCM/Ether), mp: 173–175 °C;  $[\alpha]_{\text{D}}^{27.5} = -319.0$  (c 0.1, MeOH):  $^1\text{H}$  NMR (400 MHz,  $\text{CDCl}_3$ )  $\delta$ : 8.31 (s, 0.6H)(minor), 8.12 (s, 1H)(major), 7.97 (t,  $J=9.16\text{Hz}$  2H)(major + minor), 7.52–7.44 (m, 3.8H) (major + minor), 7.32–7.21 (m, 4.1H) (major + minor), 7.18–7.16 (m, 1.8H) (major + minor), 7.03–7.02 (m, 2H) (major + minor), 6.35 (s, 0.9H) (major), 6.13 (s, 0.6H) (minor), 4.27 (t,  $J=6.62\text{Hz}$  1H) (major), 4.09 (t,  $J=5.8\text{Hz}$  0.8H) (minor), 3.96–3.88 (m, 5.3H) (major + minor), 3.81–3.78 (m, 3.1H) (major + minor), 3.51–3.46 (m, 0.7H) (major), 3.36–3.32 (m, 1H) (major), 3.17–3.06 (m, 2.2H) (major + minor) 2.35–2.34(m, 5.4H) (major + minor);  $^{13}\text{C}$  NMR (100 MHz,  $\text{CDCl}_3$ )  $\delta$ : 171.9, 171.5, 158.5, 158.3, 143.8, 43.1, 139.84, 139.82, 138.0, 137.97, 137.95, 133.7, 132.7, 132.5, 130.3, 130.2, 130.0, 129.9, 129.1, 128.2, 128.17, 128.1, 123.3, 122.5, 121.9, 121.8, 105.1, 104.9, 95.9, 94.1, 87.1, 86.6, 68.5, 67.4, 65.6, 64.9, 55.5, 55.4, 52.6, 52.5, 38.7, 37.8, 21.1. HRMS Calcd for  $\text{C}_{24}\text{H}_{22}\text{N}_2\text{O}_3\text{S}$  ( $\text{M}+\text{H}^+$ ): 418.1351, found 418.1350.



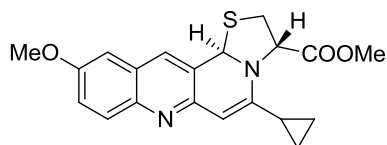

**(3*S*,12*bR*)-Methyl-5-cyclopropyl-10-methoxy-3,12*b*-**

**dihydro-2*H*-benzo[*b*]thiazolo[2,3-*f*][1,6]naphthyridine-3-carboxylate (dr=68:32) (5*n*).**

The product was obtained as a yellow needles, mp: 161–163 °C;  $[\alpha]_D^{27} = -275.3$  (c 0.1, MeOH):  $^1\text{H}$  NMR (400 MHz,  $\text{CDCl}_3$ )  $\delta$ : 8.15 (s, 0.5H)(minor), 7.97 (s, 1H)(major), 7.82 (t,  $J=9.52\text{Hz}$  1.8H)(major + minor), 7.24–7.18 (m, 1.8H) (major + minor), 6.90 (s, 2H) (major + minor), 6.13 (s, 1H) (major) 5.91 (s, 0.5H) (minor), 4.17 (t,  $J=6.6\text{Hz}$  1H) (major ), 3.99 (t,  $J=6.2\text{Hz}$  0.4H) ( minor), 3.78–3.73 (m, 9H) (major + minor), 3.22–3.21(m, 1H), 3.07–2.95 (m, 2H) (major + minor), 1.16–1.08 (m, 1.5H) (major + minor), 0.94–0.78 (m, 6.2H) (major + minor) ;  $^{13}\text{C}$  NMR (100 MHz,  $\text{CDCl}_3$ )  $\delta$ : 171.8, 171.4, 158.1, 157.9, 143.6, 142.8, 140.1, 140.0, 137.6, 133.2, 132.6, 130.0, 129.9, 129.6, 127.6, 122.9, 122.1, 105.0, 104.7, 100.9, 99.1, 74.2, 73.8, 68.6, 67.3, 65.6, 64.7, 55.3, 55.28, 53.3, 52.5, 52.4, 38.7, 37.5, 15.0, 8.8, 8.7, 8.6, 8.4, 0.3. HRMS Calcd for  $\text{C}_{20}\text{H}_{20}\text{N}_2\text{O}_3\text{S}$  ( $\text{M}+\text{H}^+$ ): 368.1195, found 368.1196.

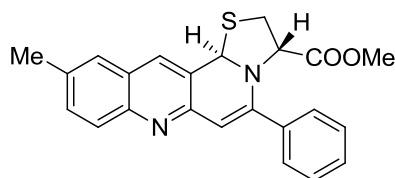

**(3*S*,12*bR*)-Methyl-10-methyl-5-phenyl-3,12*b*-dihydro-2*H*-**

**benzo[*b*]thiazolo[2,3-*f*][1,6]naphthyridine-3-carboxylate (5*o*).** The product was obtained

as a yellow needles (DCM/Ether), mp: 177–179 °C;  $[\alpha]_D^{29} = -357.0$  (c 0.1, MeOH):  $^1\text{H}$  NMR (400 MHz,  $\text{CDCl}_3$ )  $\delta$ : 8.74 (s, 1H), 8.17 (d,  $J = 8.72\text{ Hz}$ , 1H), 7.84 (s, 1H), 7.77 (dd,  $J=6.8$  and  $1.84\text{ Hz}$ , 1H), 7.24–7.22 (m, 3H), 7.14–7.12 (m, 2H), 6.61 (s, 1H), 5.96 (s, 1H), 5.72–5.70 (m, 1H), 3.83 (s, 3H), 3.75–3.70 (m, 1H), 3.47–3.41 (m, 1H), 2.66 (s, 3H);  $^{13}\text{C}$  NMR (100 MHz,  $\text{CDCl}_3$ )  $\delta$ : 193.6, 162.8, 161.0, 137.3, 135.7, 135.4, 134.2, 134.0, 129.4, 128.7, 128.4, 128.2, 127.9, 127.0, 126.8, 69.8, 52.6, 37.8, 29.6, 21.5. HRMS Calcd for  $\text{C}_{23}\text{H}_{20}\text{N}_2\text{O}_2\text{S}$  ( $\text{M}+\text{H}^+$ ): 388.1245, found 388.1244.

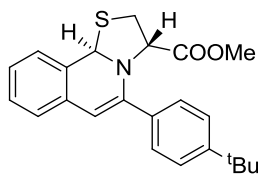

**(3*S*,10*b**R*)-Methyl-5-(4-(*tert*-butyl)phenyl)-3,10*b*-dihydro-2*H*-**

**thiazolo[2,3-*a*]isoquinoline-3-carboxylate (dr=55:45) (6).** The product was obtained as a yellow needles, mp: 161–163 °C;  $[\alpha]_D^{27} = -299.3$  (c 0.1, MeOH):  $^1\text{H}$  NMR (400 MHz,  $\text{CDCl}_3$ )  $\delta$ : 7.54–7.39 (m, 1.1H)(major + minor), 7.31–7.27 (m, 0.7H) (major + minor), 7.24–7.13 (m, 0.5H) (major + minor), 6.18 (s, 0.12H) (major), 5.96–5.92 (m, 0.2H) (major + minor), 4.20–4.17 (m, 0.18H) (major), 3.94–3.85 (m, 0.16H) (minor), 3.72–3.69 (m, 1H) (major), 3.42–3.35 (m, 0.4H) (major + minor), 3.28–3.24 (m, 0.24H)(minor), 3.07–2.99 (m, 0.52H) (major + minor), 1.24 (s, 2.1H) (major + minor), 1.17–1.09 (m, 0.7H) (major + minor) ;  $^{13}\text{C}$  NMR (100 MHz,  $\text{CDCl}_3$ )  $\delta$ : 171.1, 171.0, 170.6, 170.5, 150.8, 150.7, 143.4, 140.4, 140.6, 138.6, 136.6, 132.1, 132.0, 131.4, 130.3, 130.2, 129.0, 127.9, 127.6, 127.4, 127.3, 127.2, 127.0, 126.5, 126.2, 125.9, 124.4, 124.3, 123.7, 123.0, 122.2, 121.7, 120.8, 119.1, 119.0, 96.1, 94.5, 85.6, 85.1, 69.1, 69.2, 68.5, 67.7, 64.9, 64.8, 64.5, 64.4, 64.1, 64.0, 39.2, 38.2, 37.9, 36.9, 36.4, 33.8, 30.9, 30.2, 28.7, 27.3, 14.2 . HRMS Calcd for  $\text{C}_{23}\text{H}_{25}\text{NO}_2\text{S}$  ( $\text{M}+\text{H}^+$ ): 379.1606, found 379.1606.

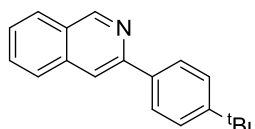

**3-(4-(*tert*-Butyl)phenyl)isoquinoline (7).**<sup>2</sup> This compound was obtained as a off white solid;  $^1\text{H}$  NMR (300 MHz,  $\text{CDCl}_3$ )  $\delta$ : 9.25 (s, 1H), 8.00–7.97 (m, 3H), 7.90 (d,  $J = 8.10$  Hz, 1H), 7.79 (d,  $J = 8.4$  Hz, 1H), 7.60 (t,  $J = 7.2$  Hz, 1H), 7.52–7.45 (m, 3H), 1.31 (s, 9H);  $^{13}\text{C}$  NMR (75 MHz,  $\text{CDCl}_3$ )  $\delta$ : 151.3, 150.6, 150.3, 135.8, 135.7, 129.4, 126.6, 126.5, 125.8 (2C), 125.6, 124.7, 115.0, 33.6, 30.3. HRMS Calcd for  $\text{C}_{19}\text{H}_{19}\text{N}$  ( $\text{M}+\text{H}^+$ ): 261.1517, found: 261.1519.

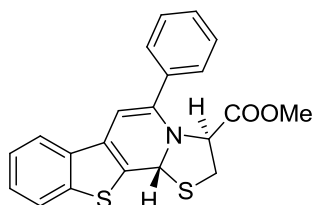

**(3S,11bR)-Methyl-5-phenyl-3,11b-dihydro-2H-benzo[4,5]thieno**

**[2,3-c]thiazolo[3,2-a]pyridine-3-carboxylate (66:34) (8a).** The product was obtained as a yellow needles, mp: 161–163 °C;  $[\alpha]_D^{31} = -301.3$  (c 0.1, MeOH):  $^1\text{H}$  NMR (400 MHz,  $\text{CDCl}_3$ )  $\delta$ : 7.89–7.84 (m, 1.8H)(major + minor), 7.71–7.66 (m, 1.8H) (major + minor), 7.56–7.53 (m, 4.0H) (major + minor), 7.36–7.24 (m, 9.2H) (major + minor), 6.32 (s, 1H) (major), 6.12 (s, 0.6H) (minor), 4.29 (t,  $J=6.64\text{Hz}$ , 1H ) (major), 3.97 (t,  $J=3.64\text{Hz}$ , 0.5H ) (minor), 3.71–3.70 (m 5.04H) (major + minor), 3.43–3.39 (m, 1.1H) (major + minor), 3.16–3.06 (m, 2.03H) (major + minor) ;  $^{13}\text{C}$  NMR (100 MHz,  $\text{CDCl}_3$ )  $\delta$ : 171.7, 170.8, 152.7, 146.0, 139.9, 139.4, 137.5, 137.2, 131.5, 131.4, 128.5, 128.4, 128.2, 125.5, 124.9, 124.6, 123.1, 122.9, 122.7, 122.4, 122.3, 117.1, 114.6, 97.2, 96.8, 81.8, 81.2, 66.0, 65.6, 64.5, 64.3, 52.54, 52.50, 39.0, 37.5 . HRMS Calcd for  $\text{C}_{21}\text{H}_{17}\text{NO}_2\text{S}_2$  ( $\text{M}+\text{H}^+$ ): 379.0701, found 379.0703.

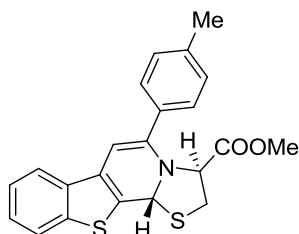

**(3S,11bR)-Methyl-5-(p-tolyl)-3,11b-dihydro-2H-benzo[4,5]**

**thieno[2,3-c]thiazolo[3,2-a]pyridine-3-carboxylate (dr=59:41) (8b).** The product was obtained as a yellow needles, mp: 162–164 °C;  $[\alpha]_D^{31} = -312.3$  (c 0.1, MeOH):  $^1\text{H}$  NMR (400 MHz,  $\text{CDCl}_3$ )  $\delta$ : 8.03–7.98 (m, 1.9H)(major + minor), 7.84–7.79 (m, 1.9H) (major + minor), 7.60–7.57 (m, 3.9H) (major + minor), 7.49–7.38 (m, 3.8H) (major + minor), 7.23 (d,  $J = 7.32$  Hz, 4H) (major + minor), 6.46 (s, 1H) (major), 6.26 (s, 0.7H) (minor), 4.42 (t,  $J=6.6\text{Hz}$ , 1H ) (major), 4.09 (t,  $J=8.04\text{Hz}$  0.7H ) (minor), 3.82 (s, 5.8H ) (major + minor), 3.54–3.52 (m, 1.44H) (major + minor), 3.27–3.19 (m, 1.8H) (major + minor), 2.41 (s, 5.4H) (major + minor);  $^{13}\text{C}$  NMR (100 MHz,  $\text{CDCl}_3$ )  $\delta$ : 171.6, 170.8, 152.2, 145.6, 139.8, 138.5, 138.4,

137.4, 137.1, 131.3, 131.2, 128.9, 125.4, 124.7, 122.9, 122.5, 122.3, 122.1, 119.7, 119.5, 117.1, 114.7, 97.3, 97.0, 81.1, 80.5, 65.9, 65.5, 64.4, 64.2, 52.3, 38.8, 37.4, 21.2, 20.7..  
HRMS Calcd for C<sub>22</sub>H<sub>19</sub>NO<sub>2</sub>S<sub>2</sub> (M+H<sup>+</sup>): 393.0857, found 393.0855.

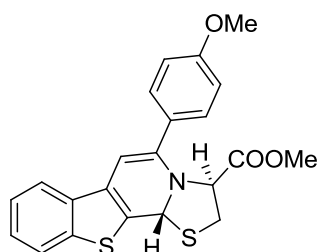

**(3*S*,11*b**R*)-Methyl-5-(4-methoxyphenyl)-3,11*b*-dihydro-2*H*-**

**benzo[4,5]thieno[2,3-*c*]thiazolo[3,2-*a*]pyridine-3-carboxylate (dr=60:40) (8c).** The product was obtained as a yellow needles, mp: 167–169 °C;  $[\alpha]_D^{27} = -311.3$  (c 0.1, MeOH): <sup>1</sup>H NMR (400 MHz, CDCl<sub>3</sub>) δ: 7.96–7.90 (m, 1H)(major + minor), 7.81–7.74 (m, 1.1H) (major + minor), 7.57–7.53 (m, 1.9H) (major + minor), 7.46–7.26 (m, 2.2H) (major + minor), 6.93–6.90 (m, 2H) (major + minor), 6.40 (s, 0.5H) (major), 6.19 (s, 0.34H) (minor), 4.41–4.37 (m, 0.5H) (major + minor), 4.08–4.03 (m, 0.56H) (major + minor) 3.84–3.81 (m, 5.95H) (major + minor), 3.53–3.44 (m, 1.2H) (major + minor), 3.24–3.14 (m, 1.1H) (major + minor); <sup>13</sup>C NMR (100 MHz, CDCl<sub>3</sub>) δ: 171.9, 171.0, 159.9, 159.8, 151.9, 145.3, 140.0, 139.6, 137.7, 137.4, 133.2, 133.1, 125.6, 125.0, 124.95, 124.7, 123.3, 122.9, 122.6, 122.4, 117.7, 115.2, 115.0, 114.1, 97.4, 97.0, 85.6, 80.1, 66.3, 65.9, 64.7, 64.6, 55.3, 52.7, 52.6, 39.2, 37.7. HRMS Calcd for C<sub>22</sub>H<sub>19</sub>NO<sub>3</sub>S<sub>2</sub> (M+H<sup>+</sup>): 409.0806, found 409.0806.

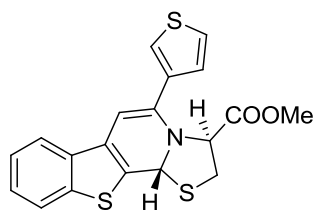

**(3*S*,11*b**R*)-Methyl-5-(thiophen-3-yl)-3,11*b*-dihydro-2*H*-benzo[4,5]**

**thieno[2,3-*c*]thiazolo[3,2-*a*]pyridine-3-carboxylate (dr=75:25) (8d).** The product was obtained as a yellow needles, mp: 161–163 °C;  $[\alpha]_D^{27} = -290.3$  (c 0.1, MeOH): <sup>1</sup>H NMR (400 MHz, CDCl<sub>3</sub>) δ: 7.95–7.89 (m, 1.9H)(major + minor), 7.78–7.74 (m, 2H) (major + minor),

7.43–7.40 (m, 4H) (major + minor), 7.34–7.31 (m, 1H) (major + minor), 7.27–7.24 (m, 1H) (major + minor), 7.16 (d,  $J=5.84\text{Hz}$ , 1H) (major + minor), 6.38 (s, 1H) (major), 6.17 (s, 0.35H) (minor), 4.38–4.36 (m, 1H) (major + minor), 4.06–4.02 (m, 0.4H) (major + minor), 3.80–3.79 (m, 4.2H) (major + minor), 3.50–3.47 (m, 1.4H) (major + minor), 3.23–3.14 (m, 1.4H) (major + minor);  $^{13}\text{C}$  NMR (100 MHz,  $\text{CDCl}_3$ )  $\delta$ : 171.9, 171.1, 152.5, 145.9, 140.0, 139.6, 139.2, 138.1, 137.7, 137.4, 132.5, 132.2, 132.1, 130.5, 129.5, 129.4, 129.0, 128.8, 128.7, 128.5, 128.3, 125.6, 125.5, 125.0, 124.8, 123.3, 122.9, 122.8, 122.6, 122.4, 117.3, 114.8, 114.0, 97.5, 97.1, 81.5, 81.0, 66.2, 65.8, 64.6, 64.5, 52.7, 52.6, 39.2, 37.7. HRMS Calcd for  $\text{C}_{19}\text{H}_{15}\text{NO}_2\text{S}_3$  ( $\text{M}+\text{H}^+$ ): 385.0265, found 385.0266.

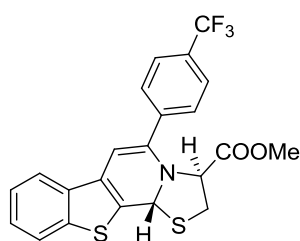

**(3S,11bR)-Methyl-5-(4-(trifluoromethyl)phenyl)-3,11b-dihydro-**

**2H-benzo[4,5]thieno[2,3-c]thiazolo[3,2-a]pyridine-3-carboxylate (dr=50:50) (8e).** The product was obtained as a yellow needles, mp: 161–163 °C;  $[\alpha]_{\text{D}}^{27} = -301.3$  (c 0.1, MeOH):  $^1\text{H}$  NMR (400 MHz,  $\text{CDCl}_3$ )  $\delta$ : 7.86–7.81 (m, 1.9H)(major + minor), 7.71–7.66 (m, 1.9H) (major + minor), 7.63–7.61 (m, 3H) (major + minor), 7.55–7.53 (m, 3H) (major + minor), 7.38–7.24 (m, 4H) (major + minor), 6.31 (s, 1H) (major), 6.11(s, 0.5H) (minor), 4.29 (t,  $J=5.92\text{Hz}$ , 1H) (major + minor), 3.99 (t,  $J=7.8\text{Hz}$ , 0.5H) (minor), 3.72 (m, 4.5H) (major + minor), 3.42–3.41 (m, 1.2H) (major + minor), 3.17–3.07 (m, 1.9H) (major + minor);  $^{13}\text{C}$  NMR (100 MHz,  $\text{CDCl}_3$ )  $\delta$ : 171.8, 170.9, 154.2, 147.4, 139.7, 139.2, 137.5, 137.2, 131.7, 131.6, 126.8, 126.4, 125.6, 125.2, 125.1, 125.0, 124.8, 122.9, 122.52, 122.50, 122.3, 116.3, 113.9, 95.8, 95.3, 84.3, 83.7, 66.0, 65.7, 64.5, 64.2, 52.5, 39.0, 37.5. HRMS Calcd for  $\text{C}_{22}\text{H}_{16}\text{F}_3\text{NO}_2\text{S}_2$  ( $\text{M}+\text{H}^+$ ): 447.0575, found 447.0574

## NOESY Experiment

### NOESY Experiment of **5a**:

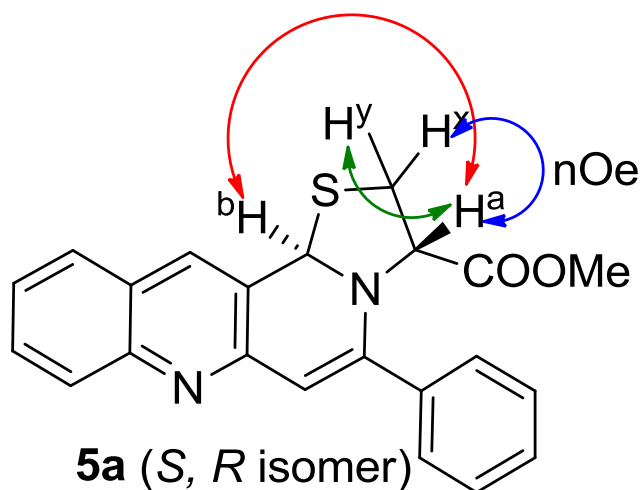

**Results:** The relative configuration of the new stereogenic center at  $H^b$  in product **5a** was determined by NOESY experiments.  $^1\text{H}$  NMR spectra of **5a** show that  $H^b$  appears at 6.39 as a singlet and  $H^a$  at 4.29–4.27 as multiplet. No distinct NOE effect was observed between  $H^b$  and  $H^a$  in compound **5a**. This suggested that  $H^b$  and  $H^a$  are located in *trans*-orientation.

## References:

1. (a) A. K. Verma; S. K. R. Kotla; D. Choudhary; M. Patel; R. K. Tiwari, *J. Org. Chem.* 2013, **78**, 4386; (b) A. K. Verma; V. Rustagi; T. Aggarwal; A. P. Singh, *J. Org. Chem.* 2010, **75**, 7691; (c) M. Zahid; V. O. Iaroshenko; A. S. Saghyan; C. Fischer; P. Langer *Tetrahedron* 2013, **69**, 3451; (d) A. Chandra; B. Singh; S. Upadhyay; R. M. Singh, *Tetrahedron* 2008, **64**, 11680; (e) V. Rustagi; T. Aggarwal; A. K. Verma, *Green Chem.* 2011, **13**, 1640; (f) V. Rustagi; R. K. Tiwari; A. K. Verma, *Eur. J. Org. Chem.* 2012, **24**, 4590.
2. D. Yang, S. Burugupalli, D. Daniel, Y. Chen *J. Org. Chem.* 2012, **77**, 4466

# Copies of $^1\text{H}$ NMR, $^{13}\text{C}$ NMR

## $^1\text{H}$ NMR

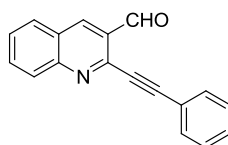

**1a**

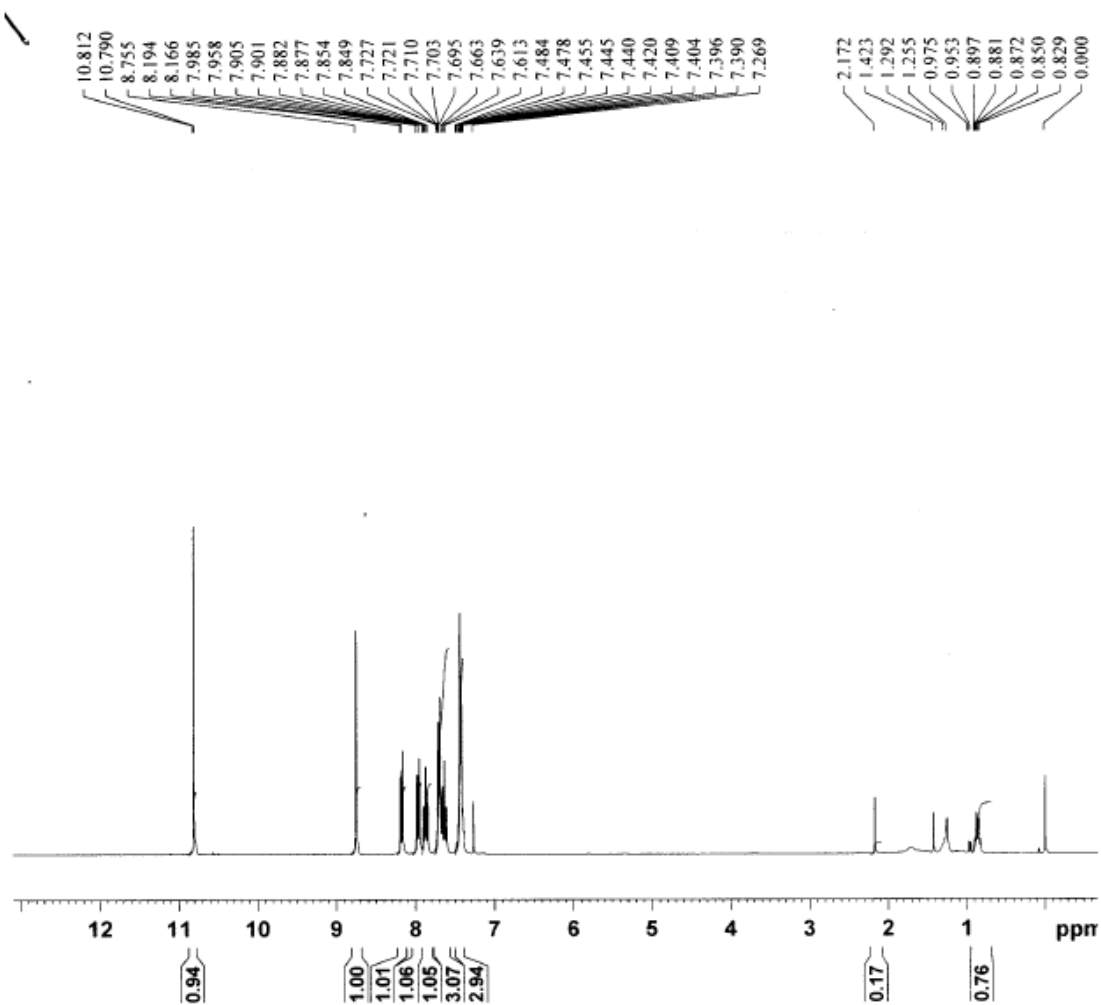



# <sup>13</sup>C NMR

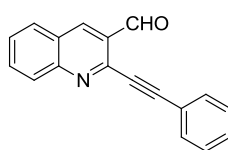

**1a**

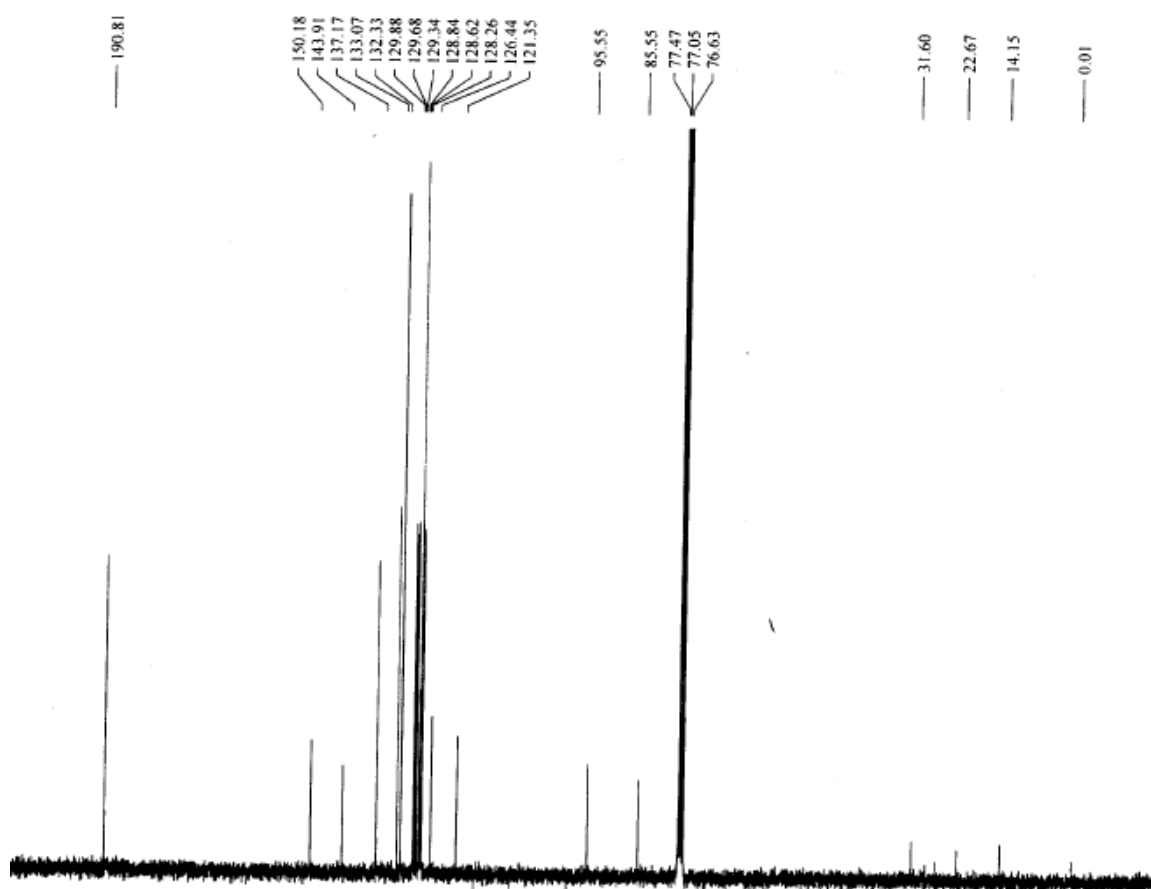

# <sup>1</sup>H NMR

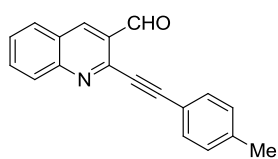

**1b**

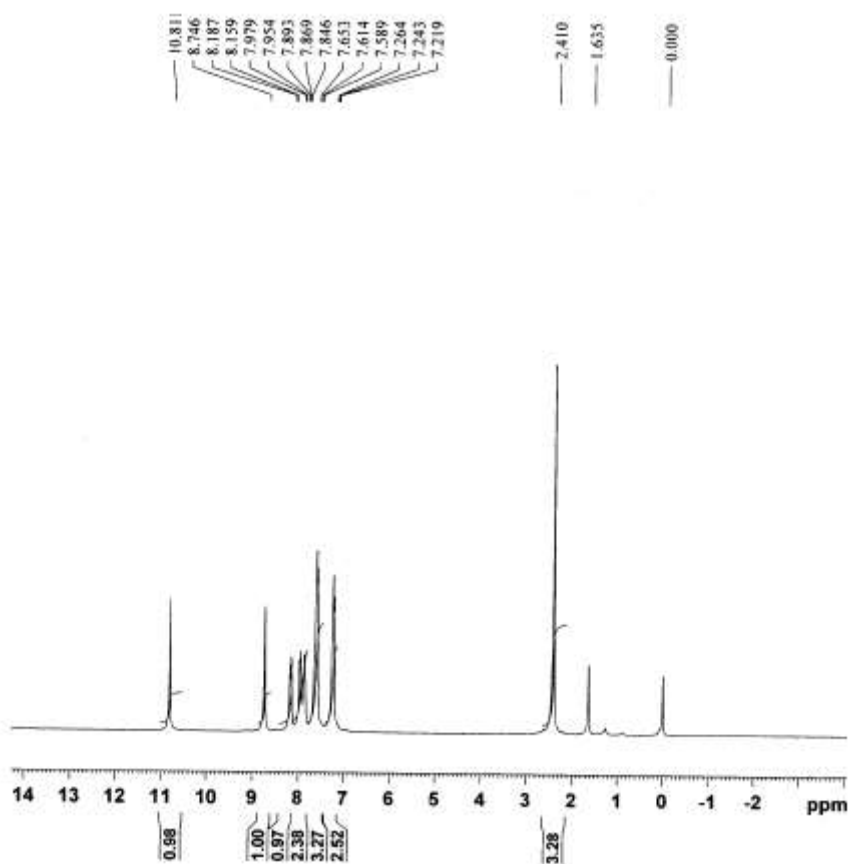

# <sup>13</sup>C NMR

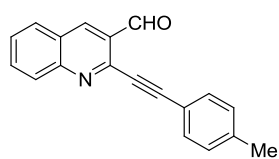

**1b**

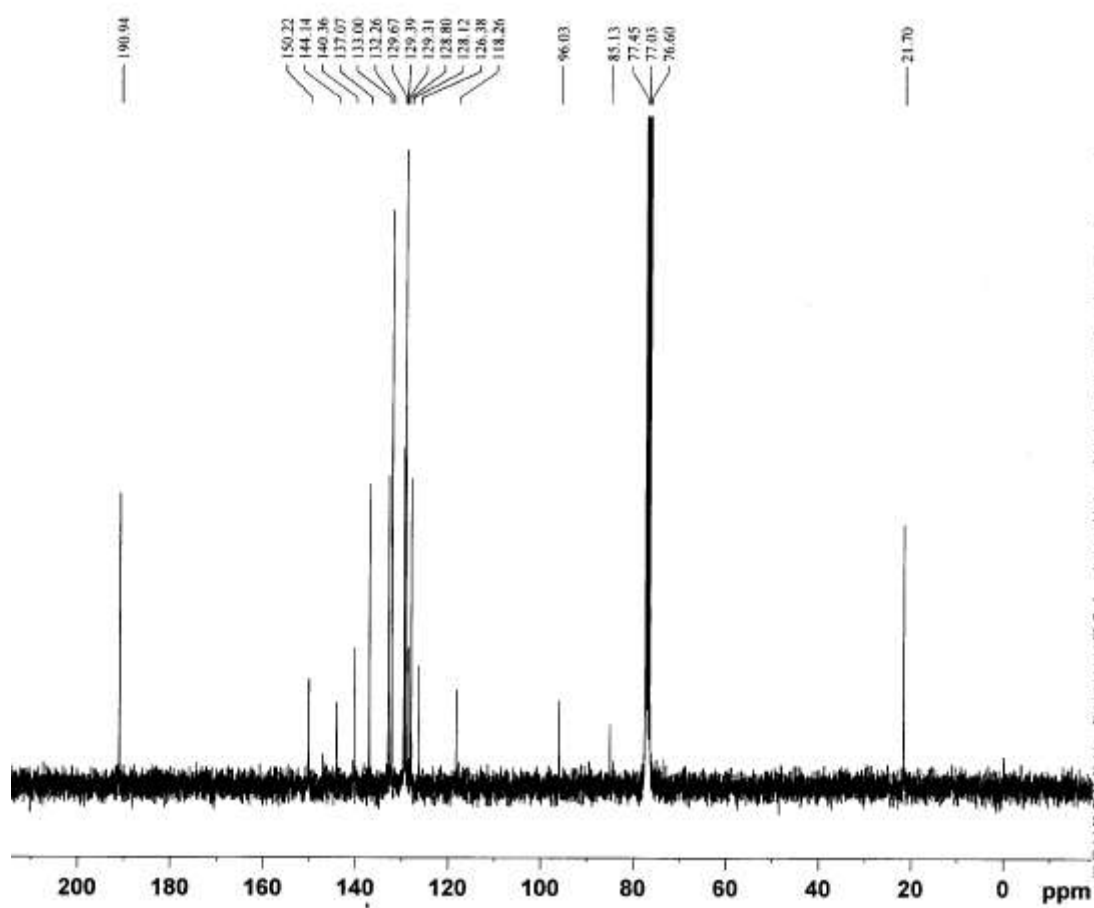

# <sup>1</sup>H NMR

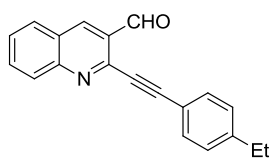

**1c**

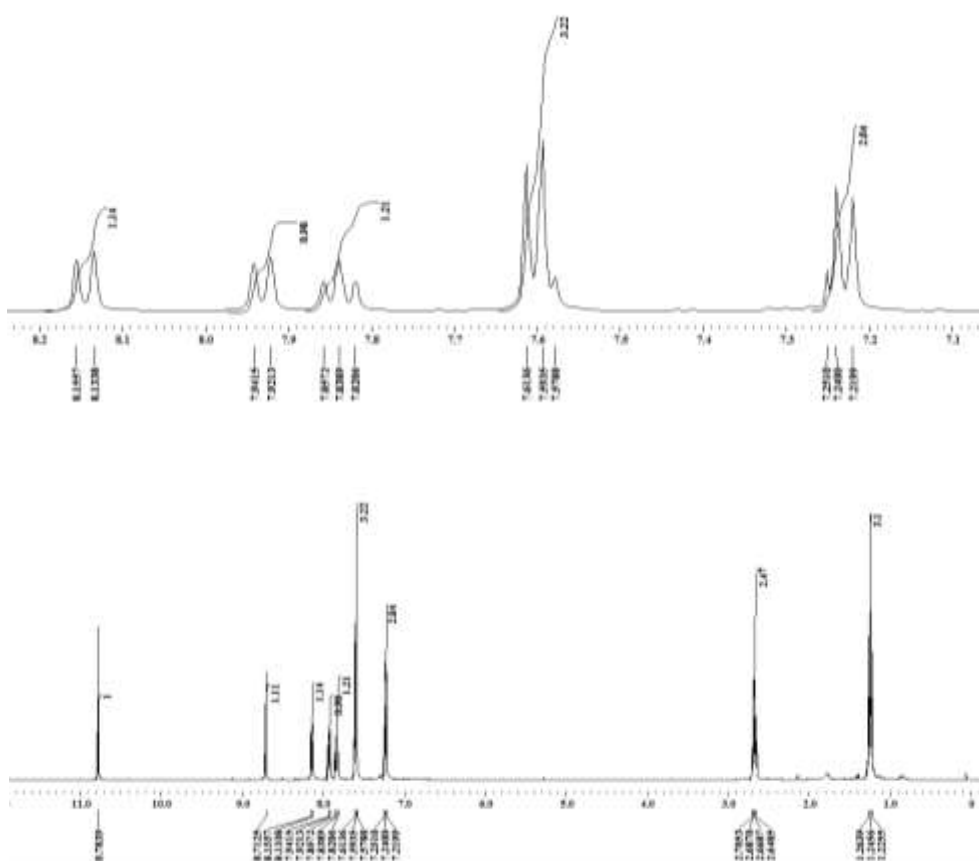

<sup>13</sup>C NMR

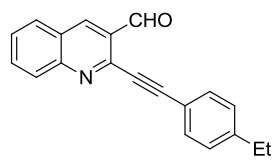

1c

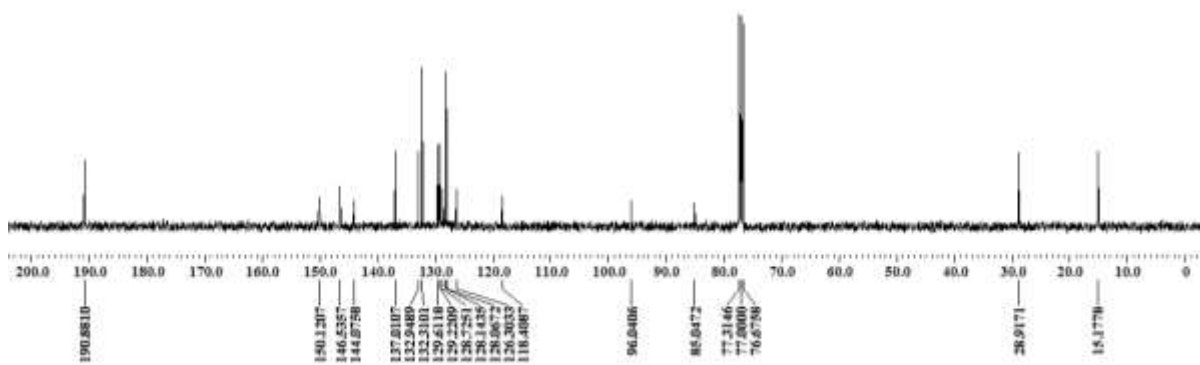

# <sup>1</sup>H NMR

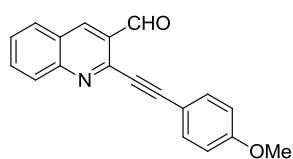

**1d**

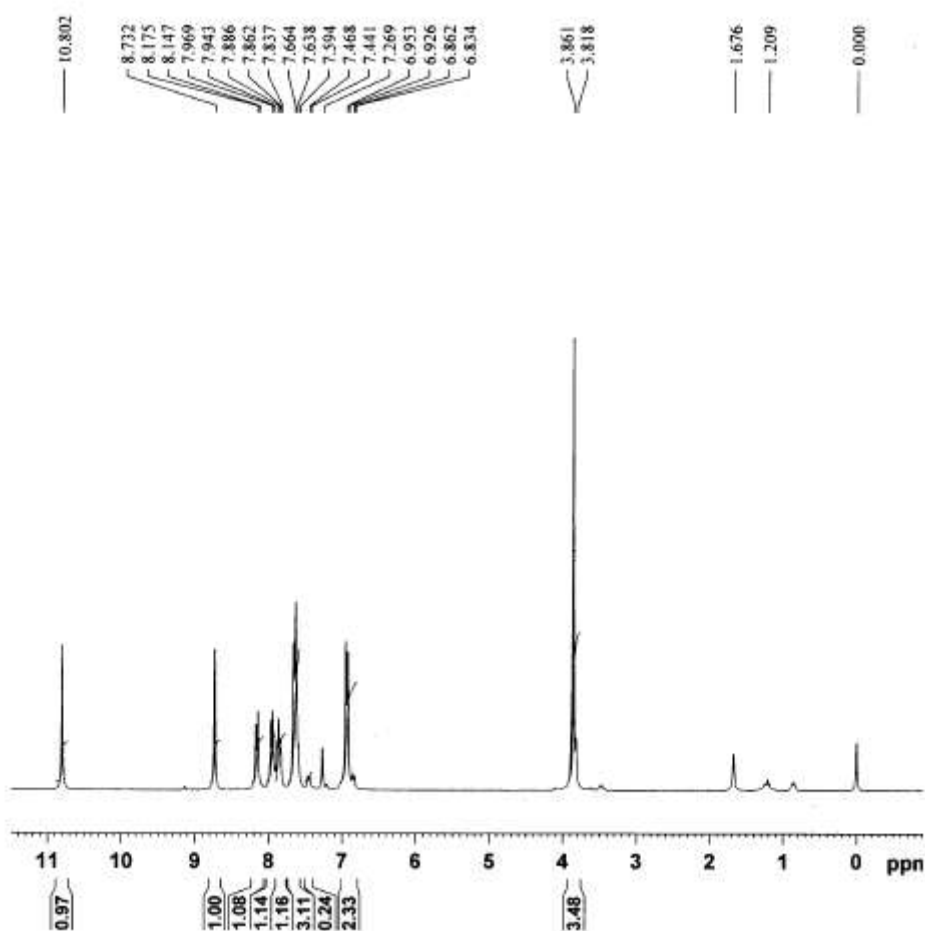

# $^{13}\text{C}$ NMR

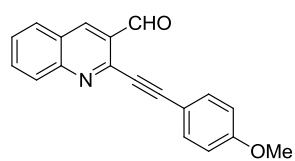

**1d**

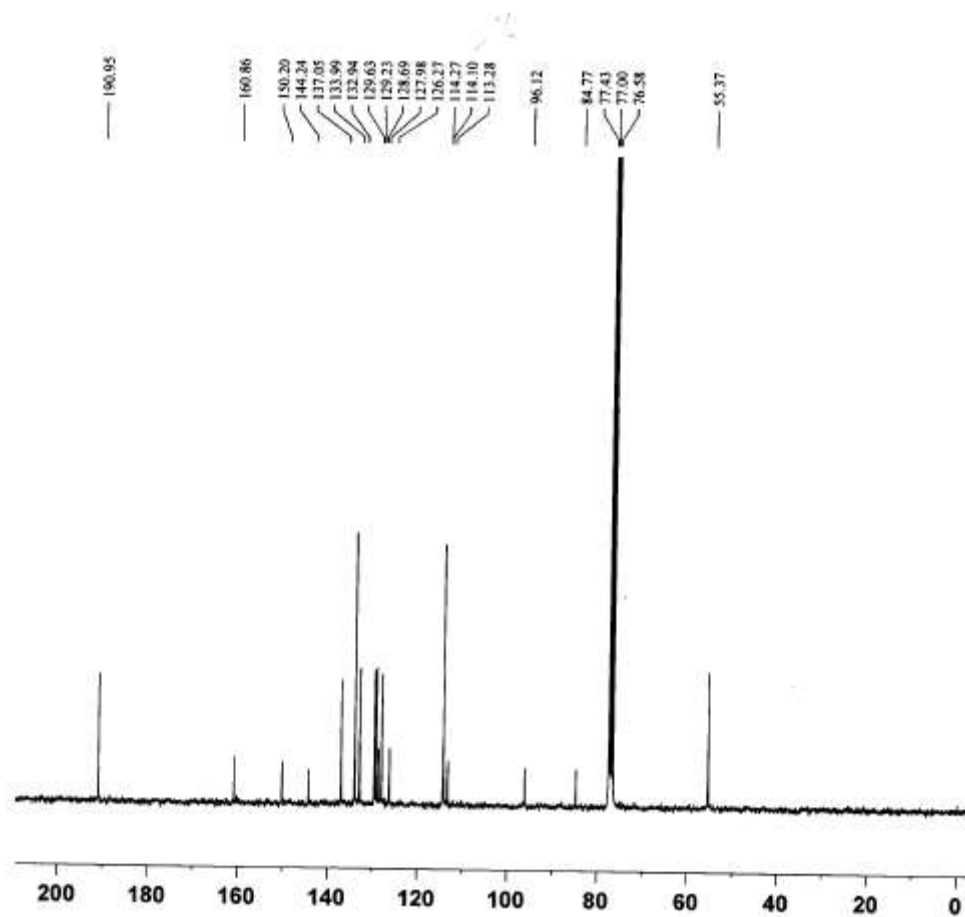

# <sup>1</sup>H NMR

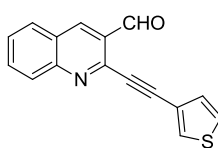

**1e**

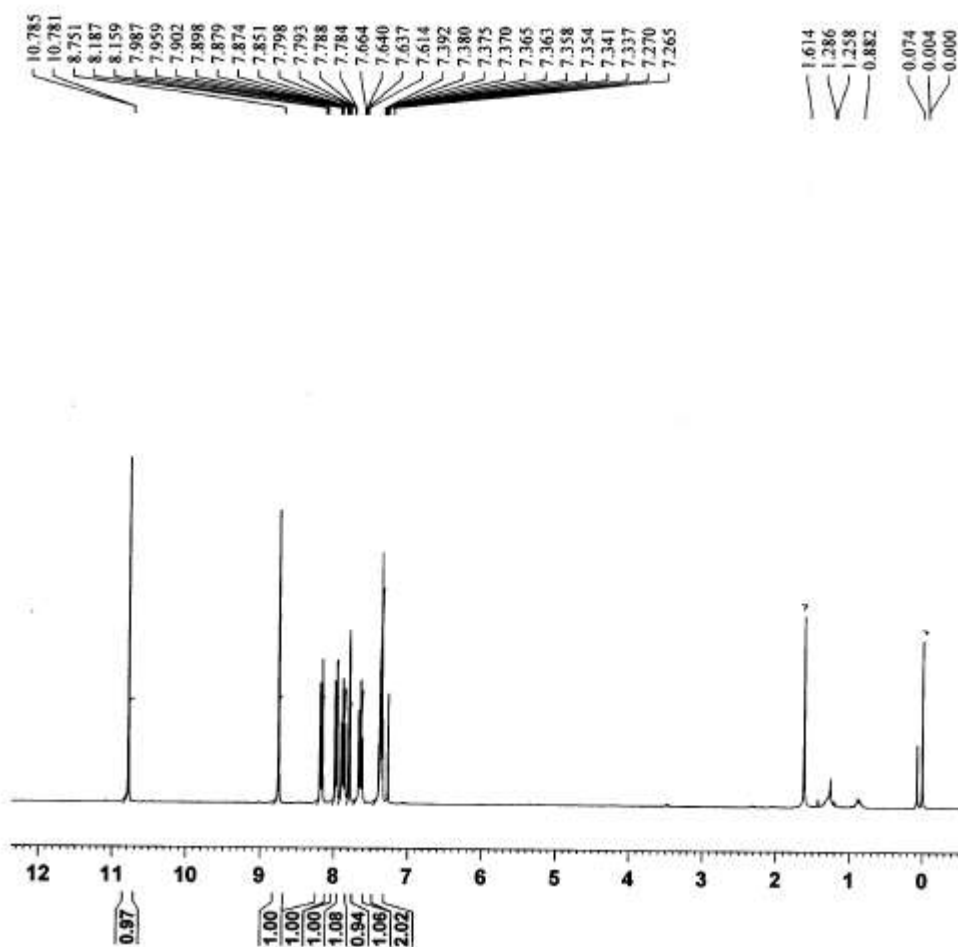



# <sup>13</sup>C NMR



**1e**

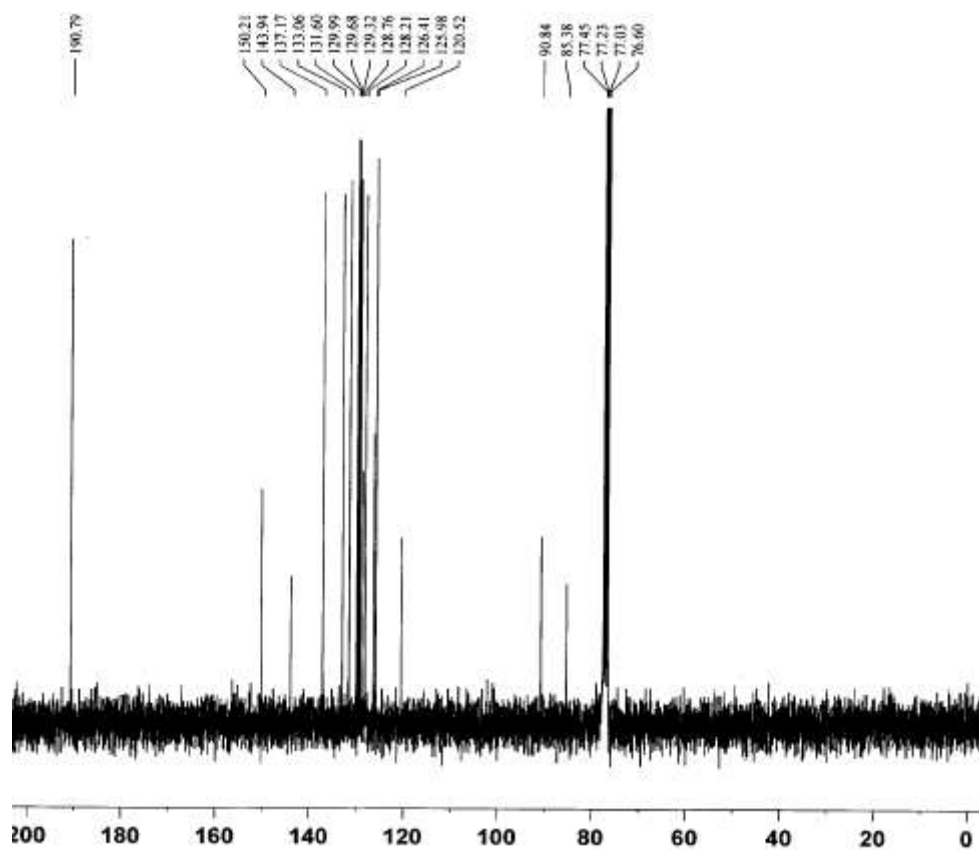

# <sup>1</sup>H NMR

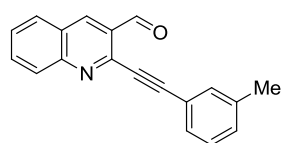

**1f**

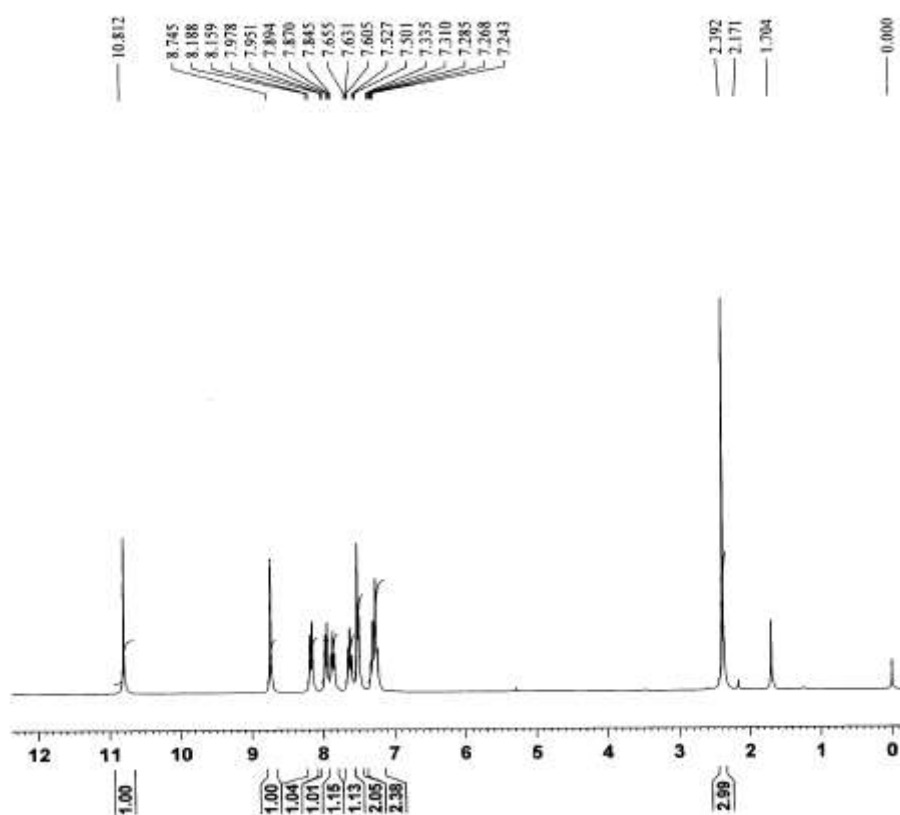

<sup>13</sup>C NMR

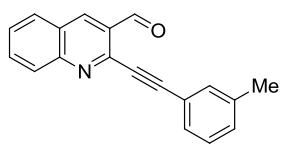

**1f**

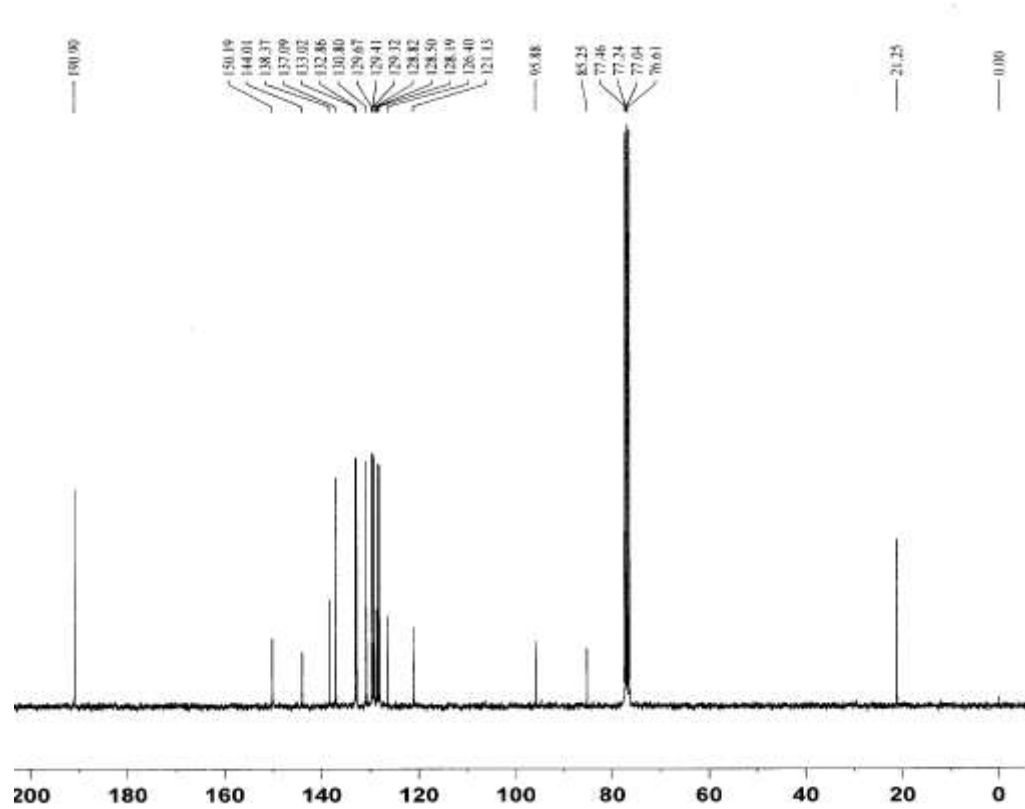

# <sup>1</sup>H NMR

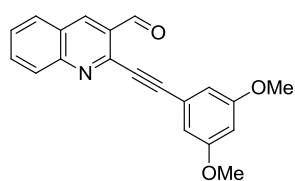

**1g**

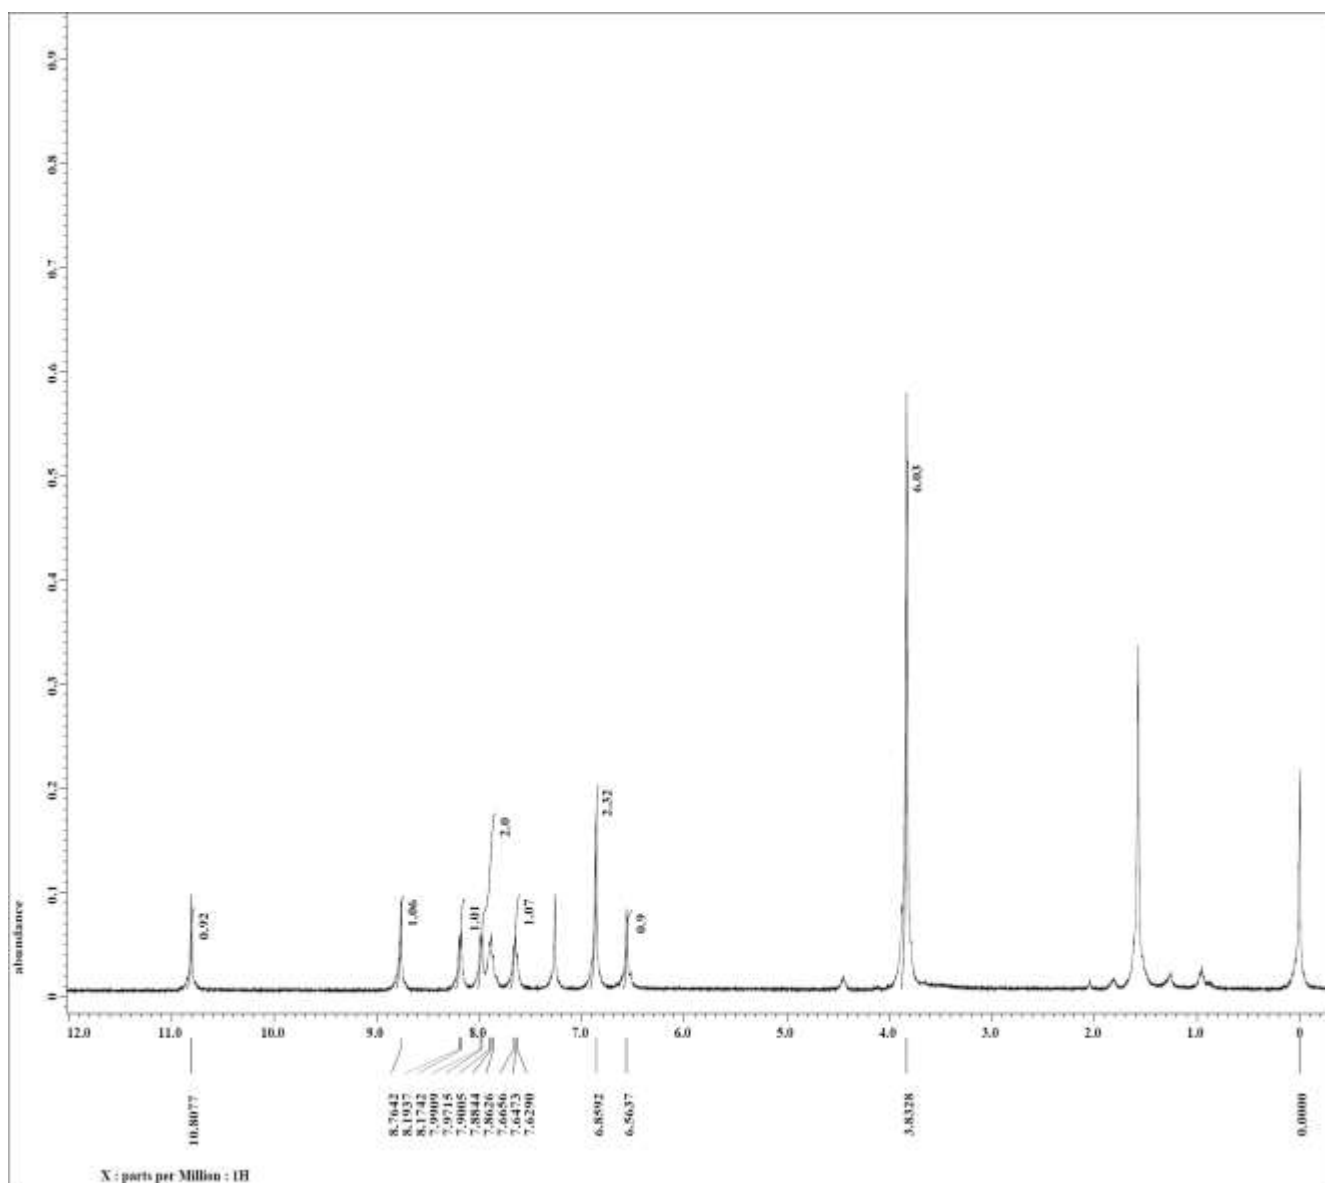

<sup>13</sup>C NMR

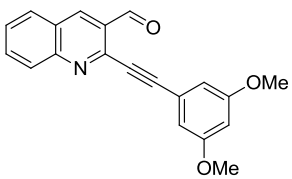

1g

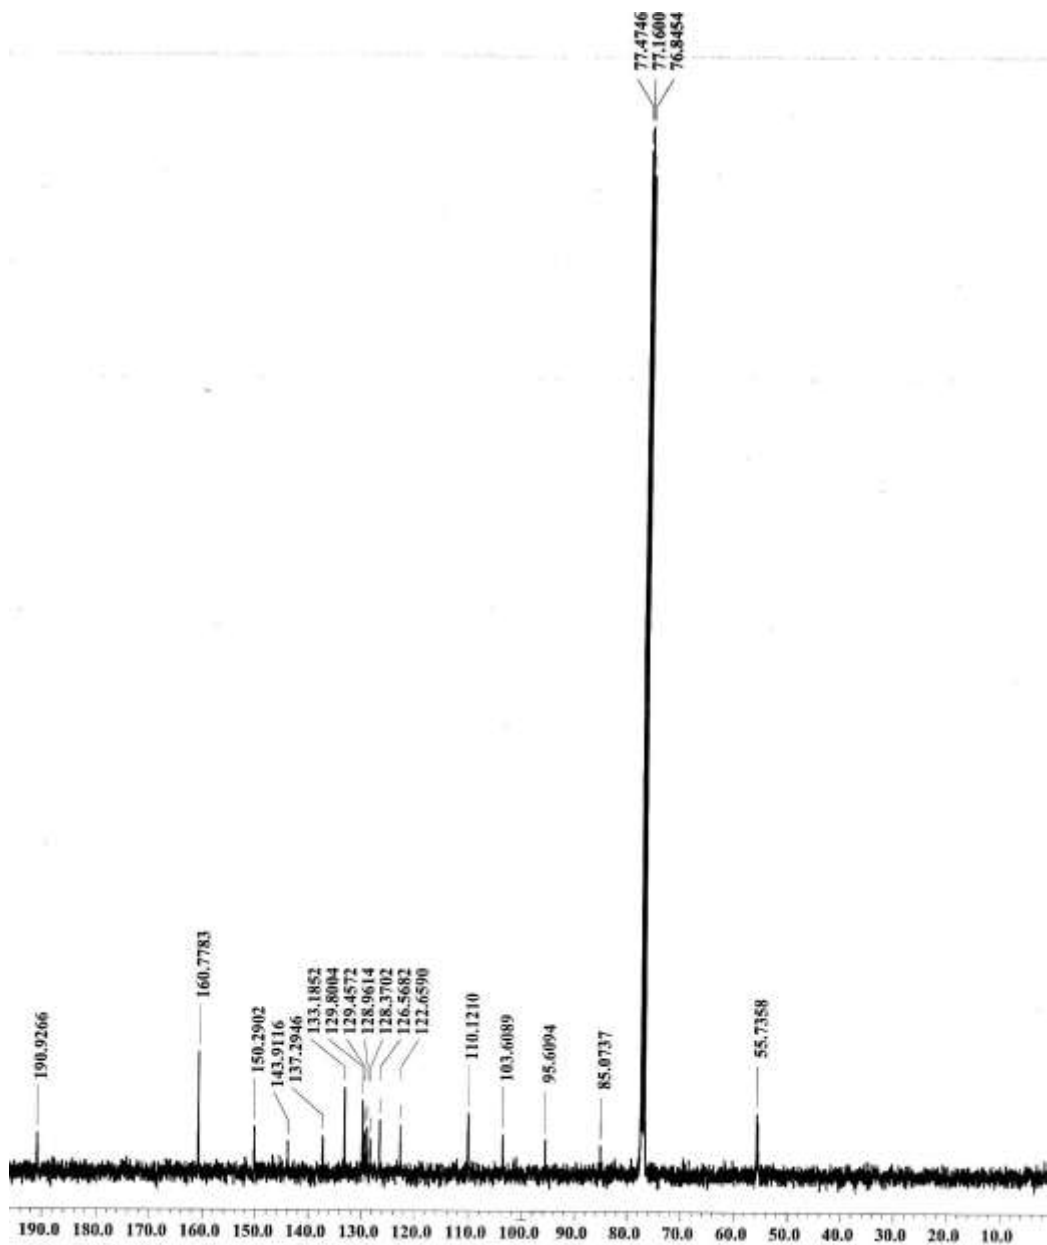

# <sup>1</sup>H NMR

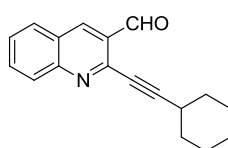

**1h**

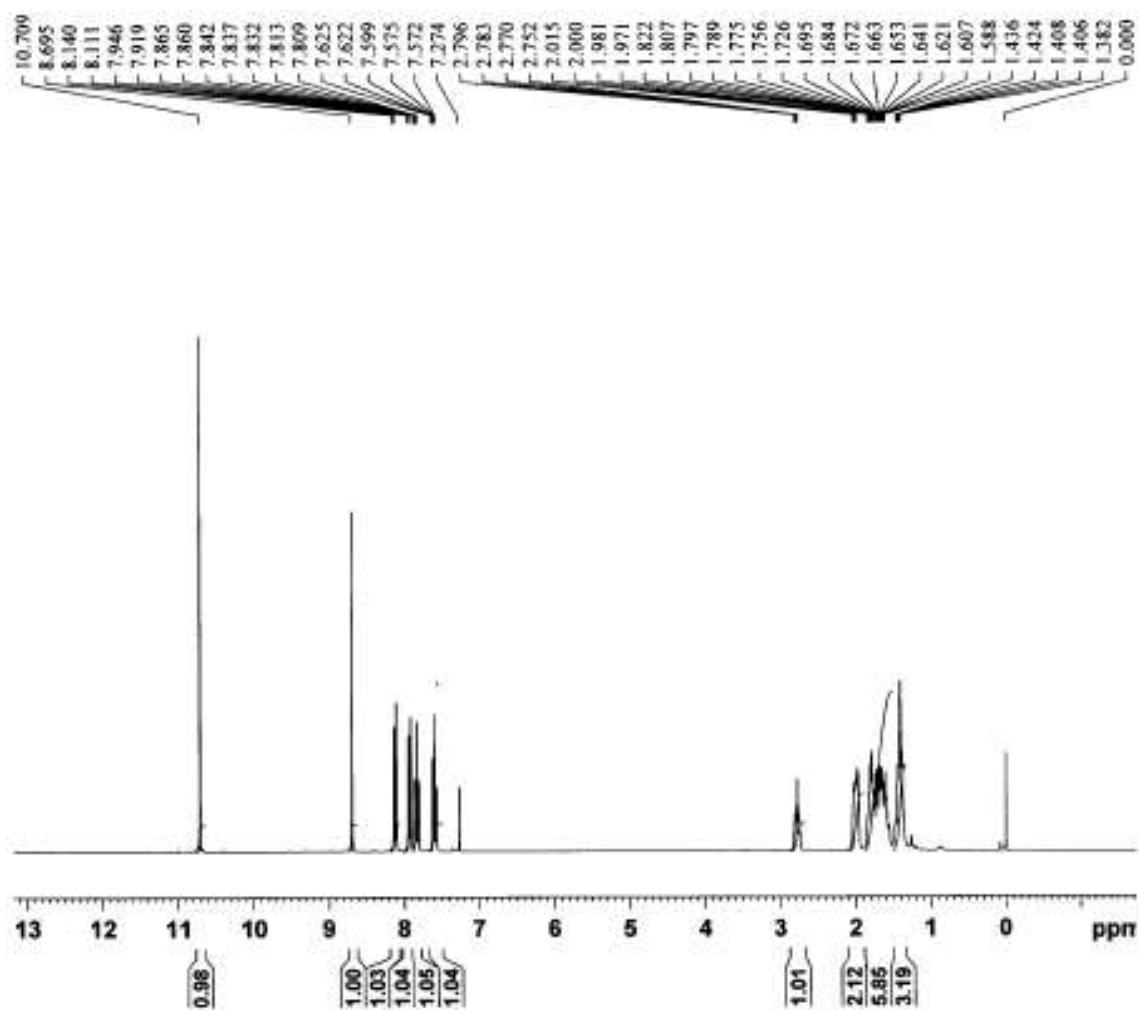

# <sup>13</sup>C NMR

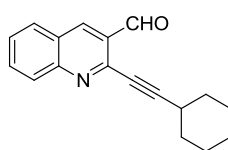

**1h**

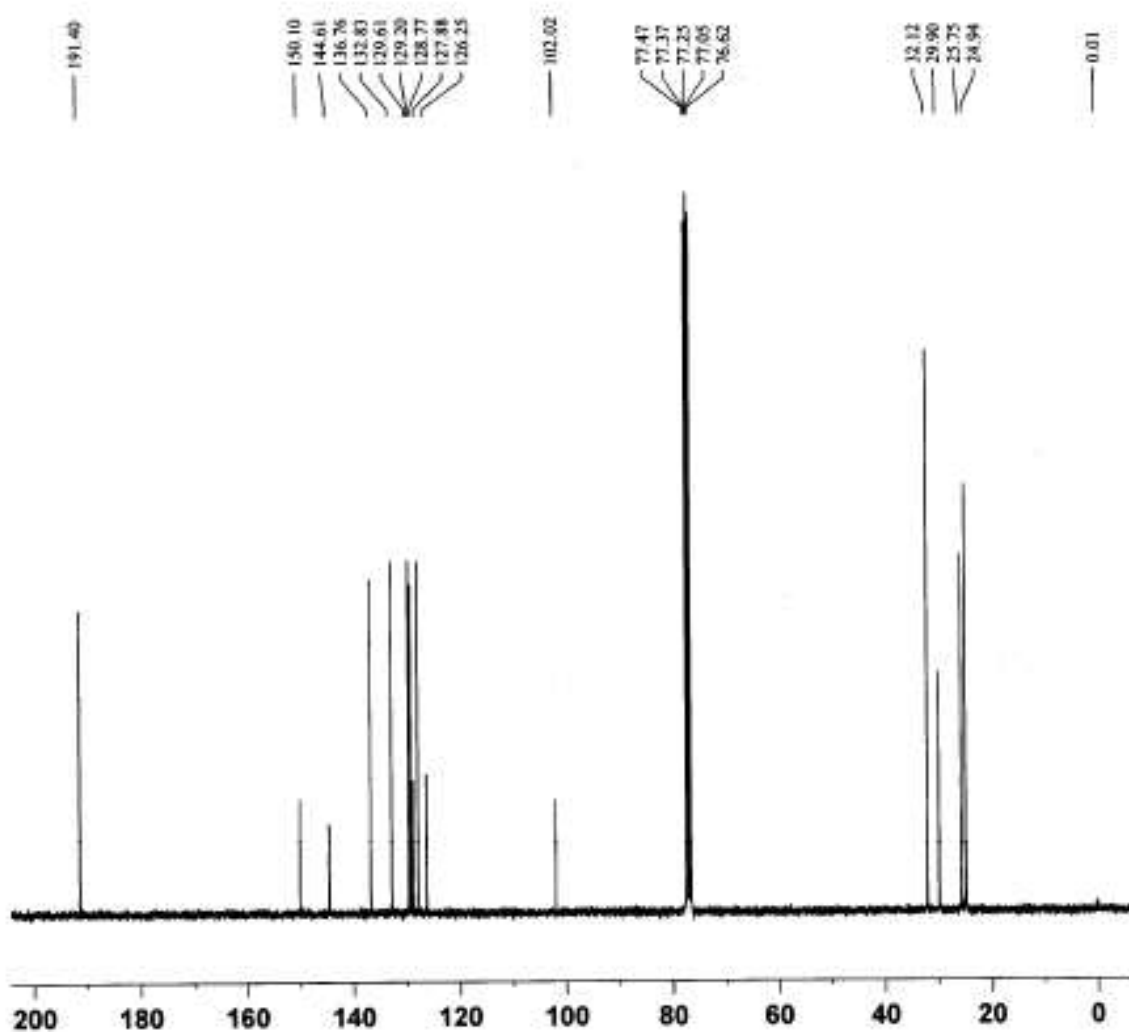

# <sup>1</sup>H NMR

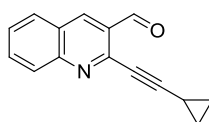

**1i**

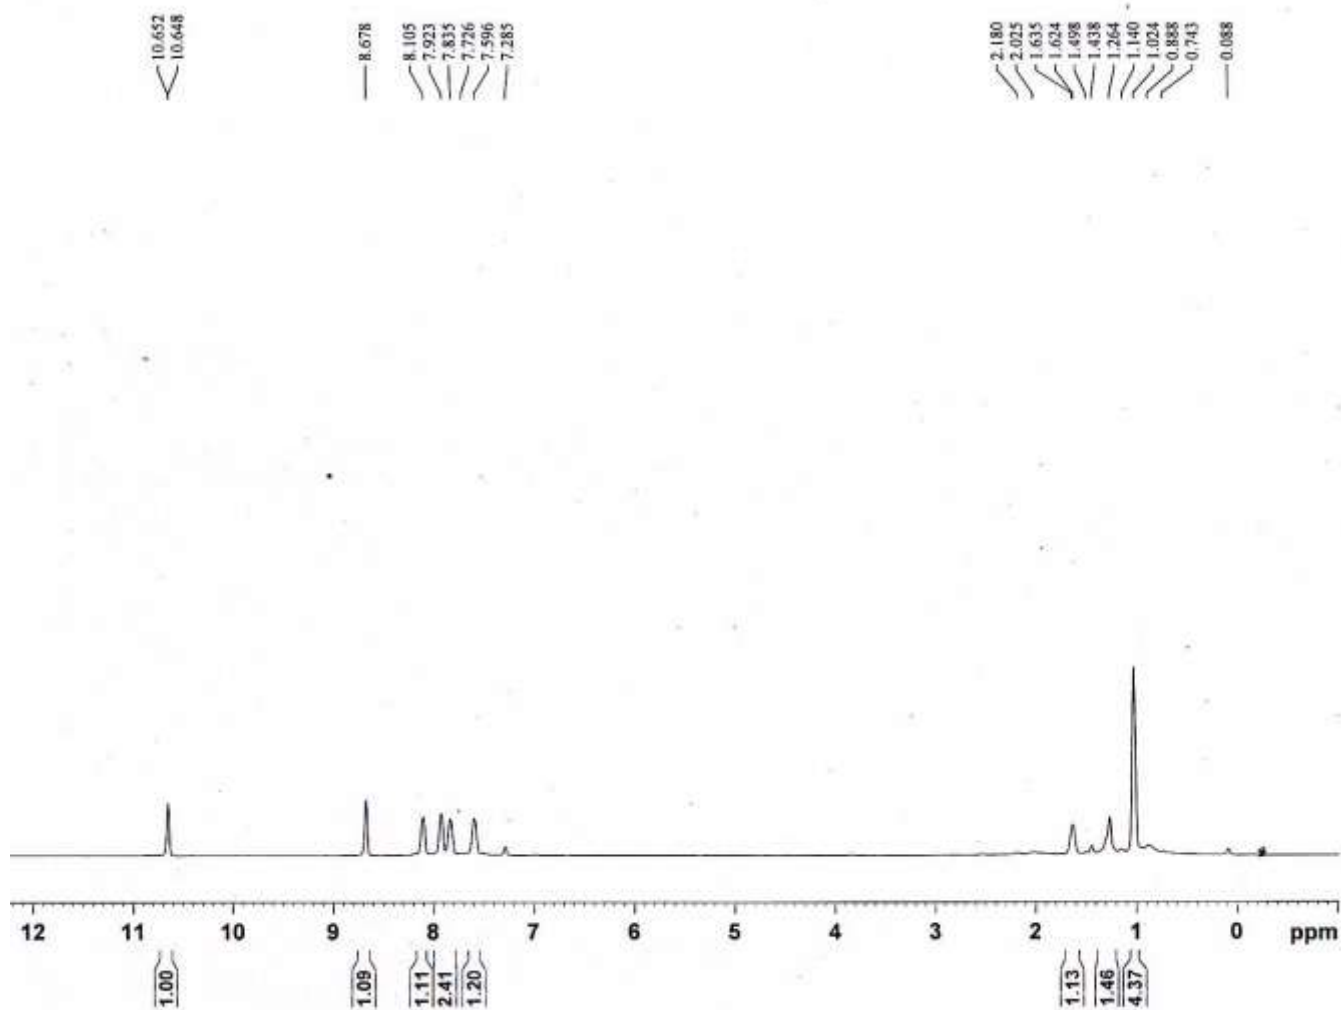



# <sup>13</sup>C NMR



**1i**

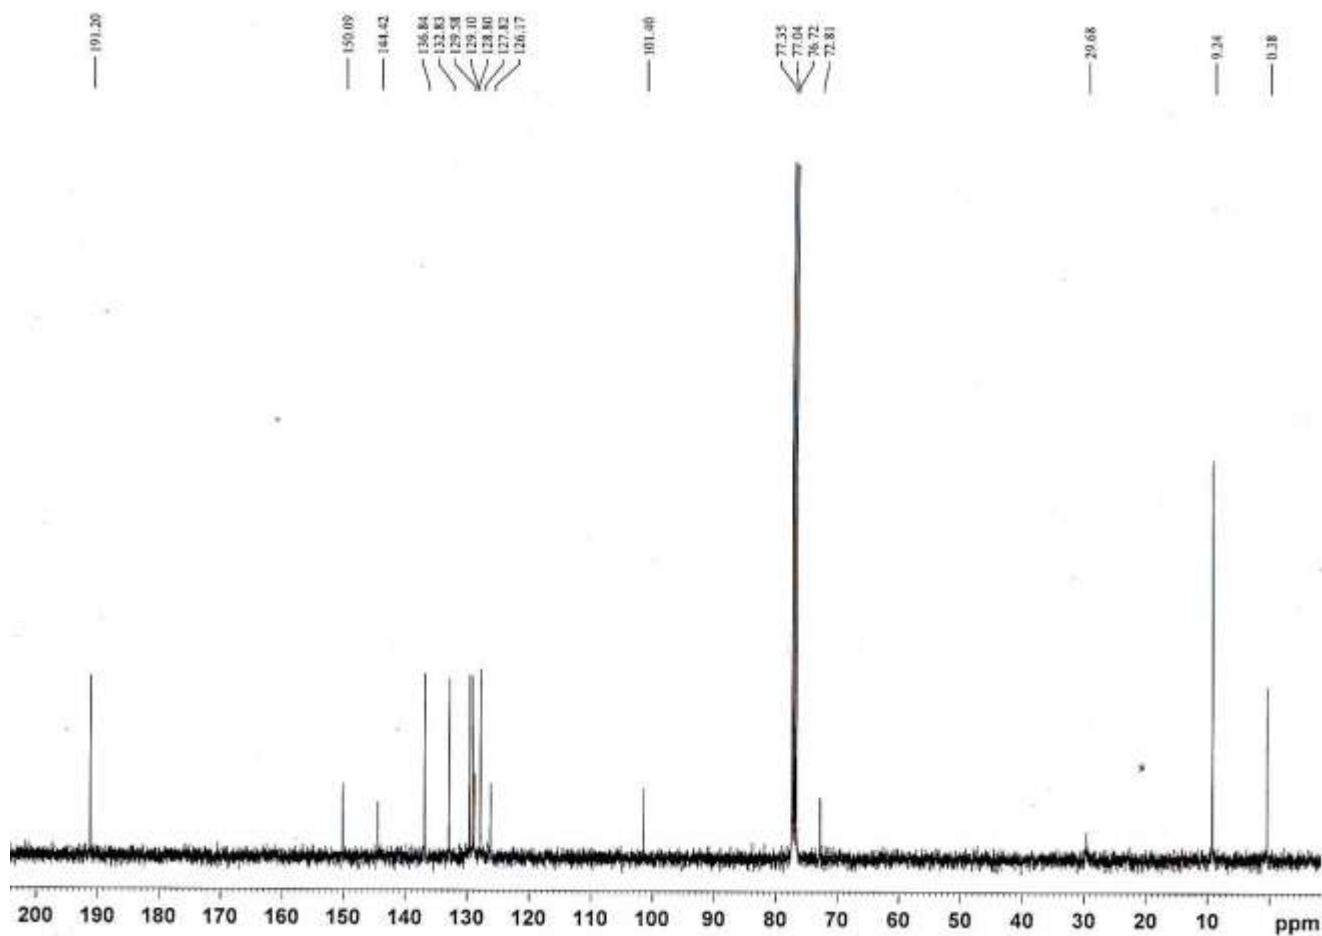

# <sup>1</sup>H NMR

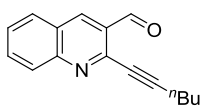

**1j**

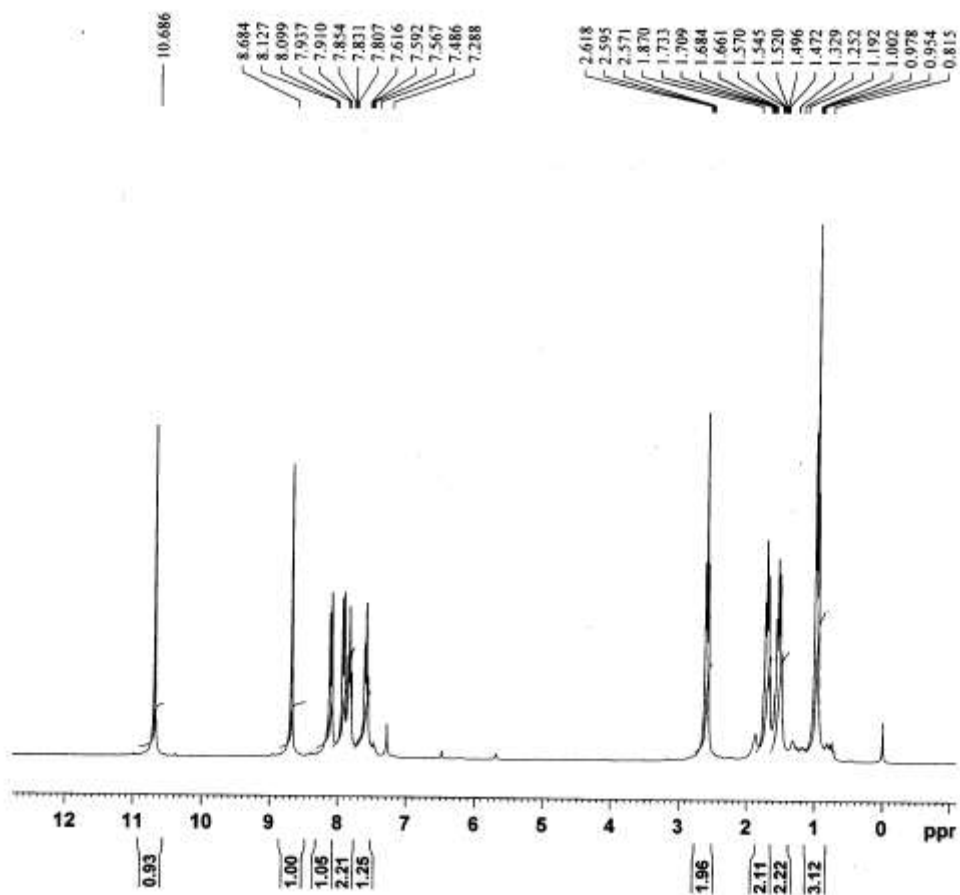

# <sup>13</sup>C NMR



**1j**

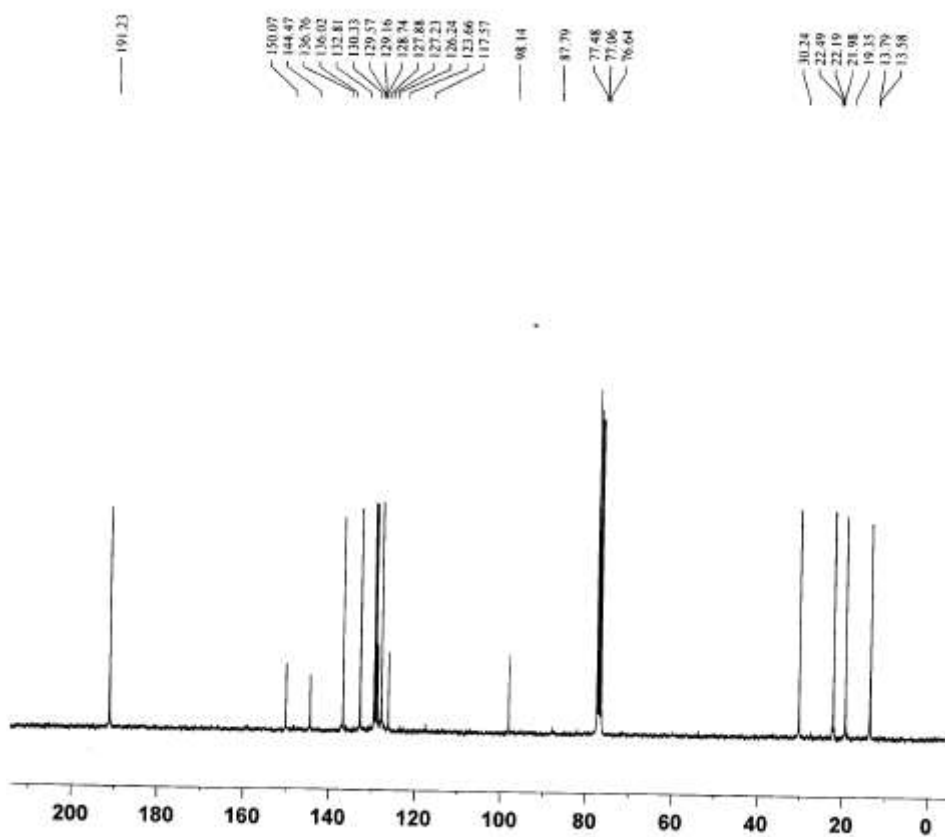

## <sup>1</sup>H NMR

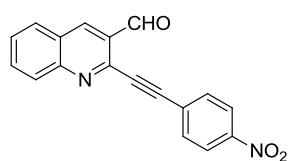

**1k**

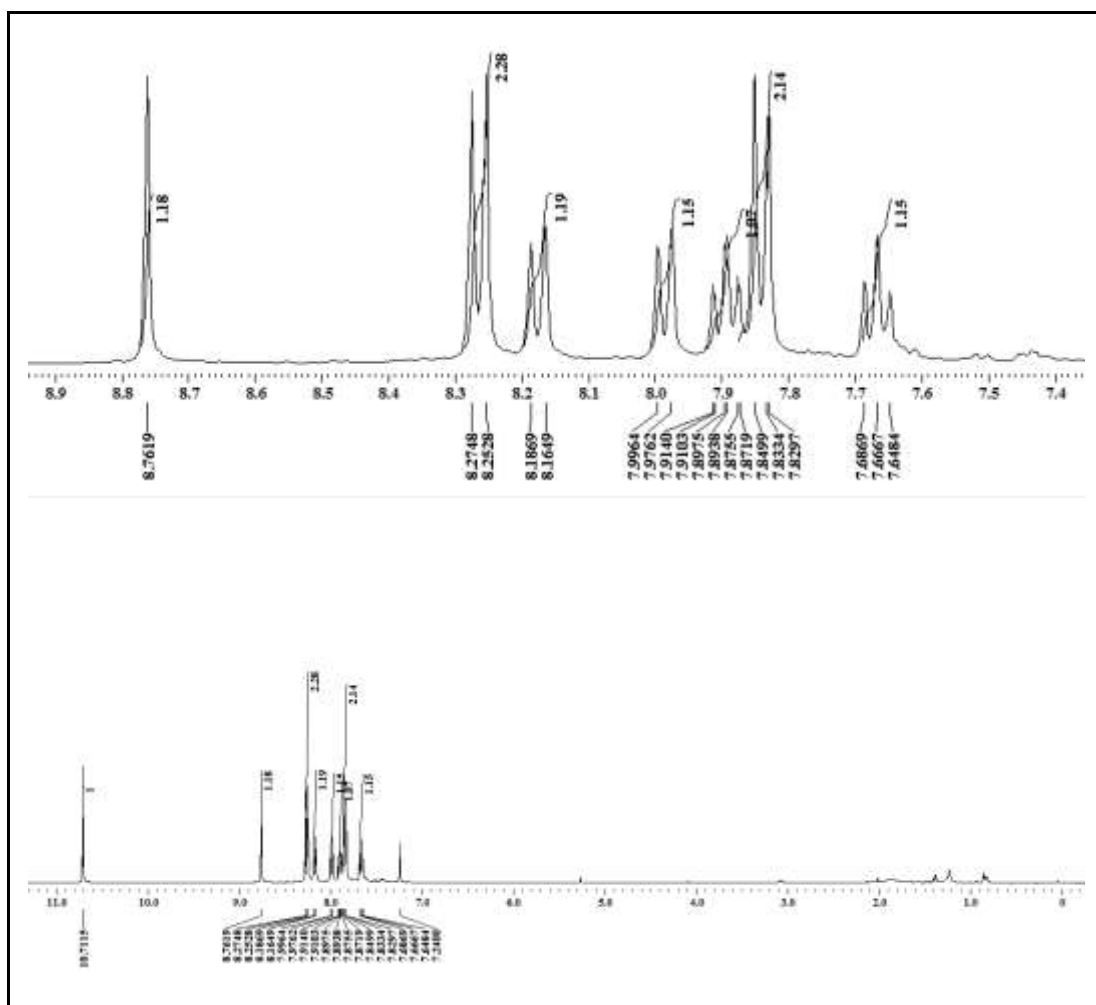

# <sup>13</sup>C NMR

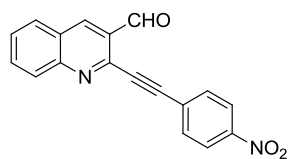

**1k**

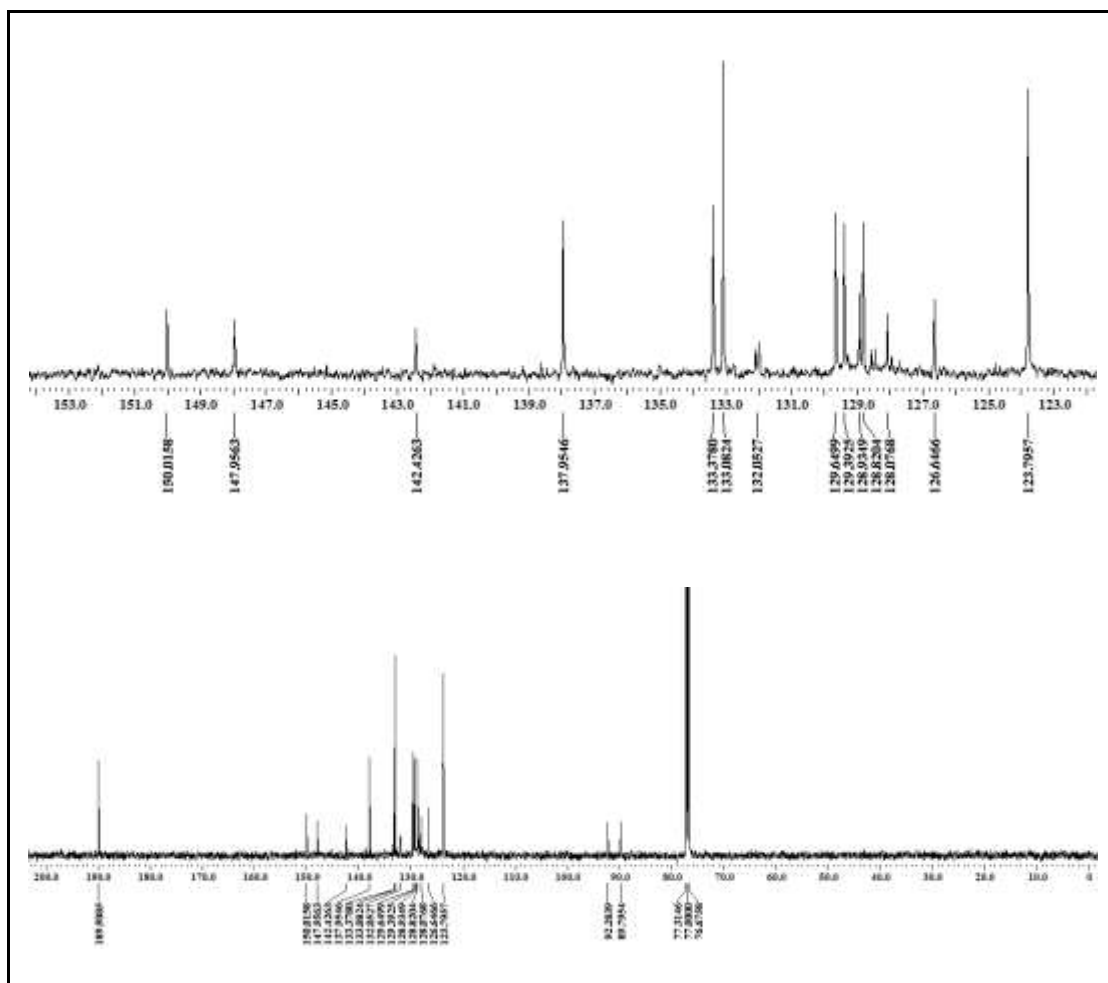

# <sup>1</sup>H NMR

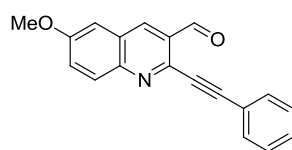

**11**

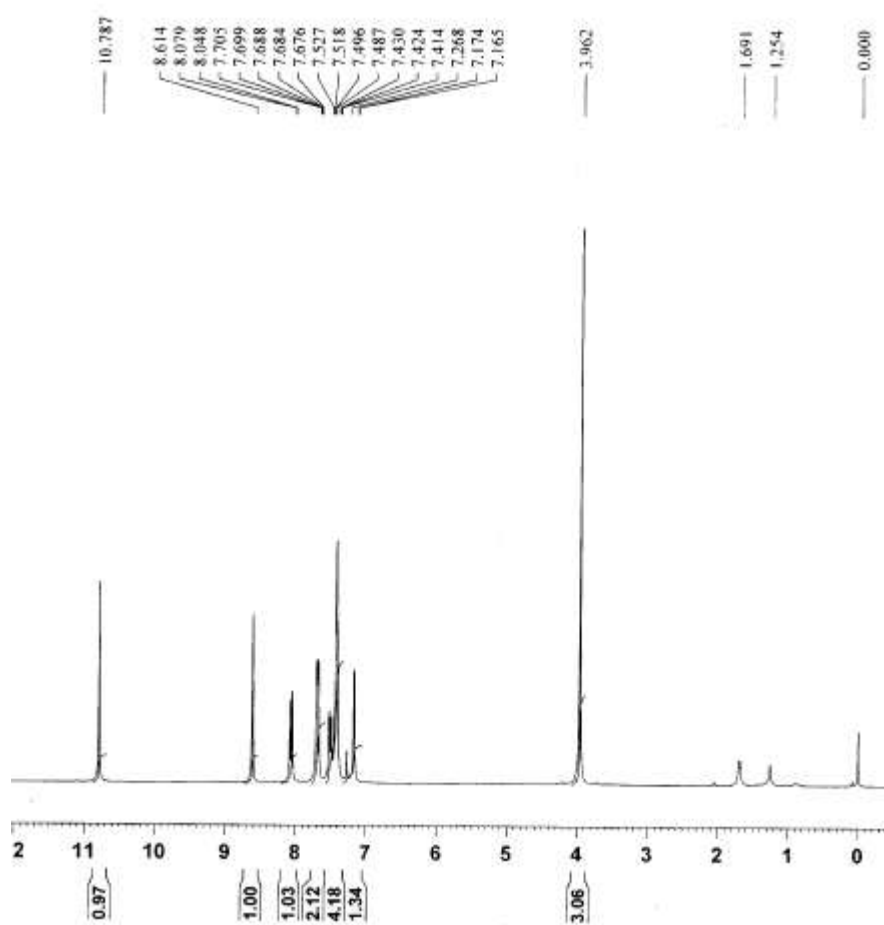

# <sup>13</sup>C NMR

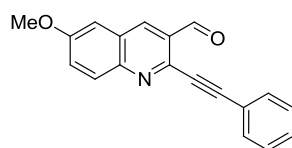

**11**

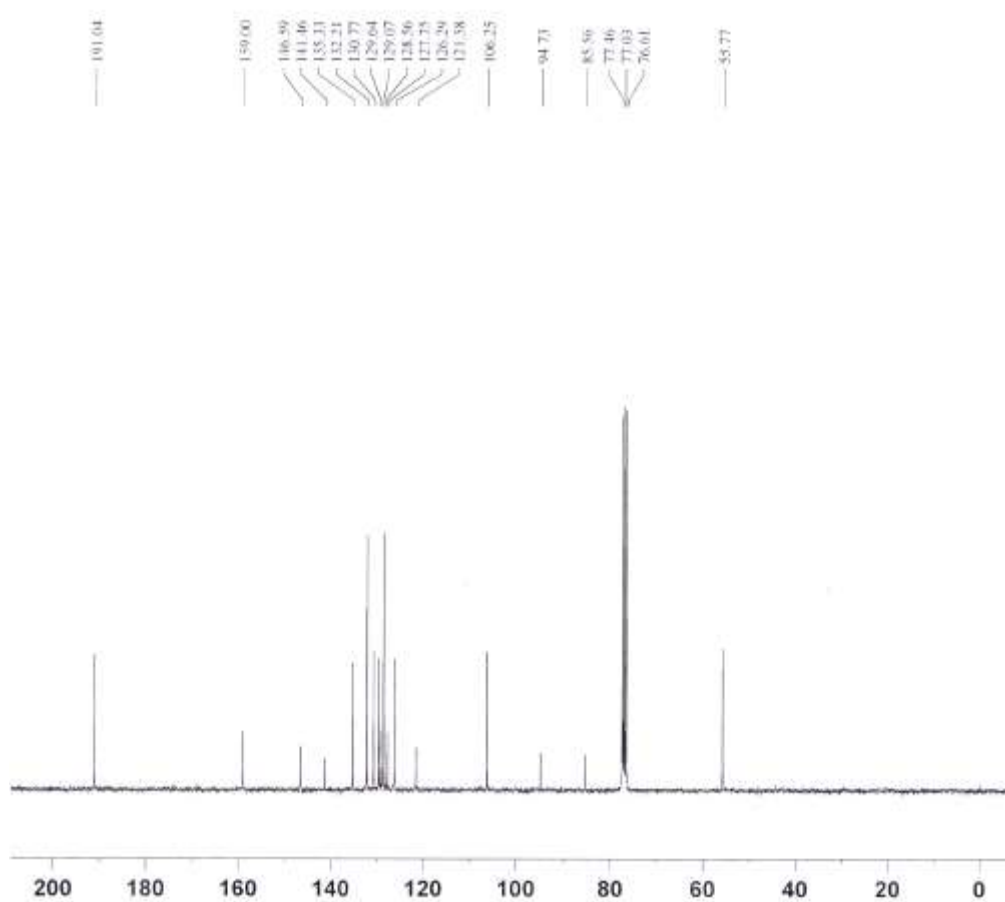

# <sup>1</sup>H NMR

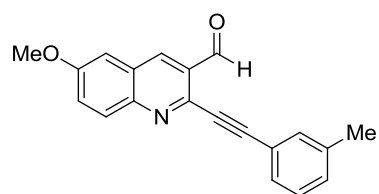

**1m**

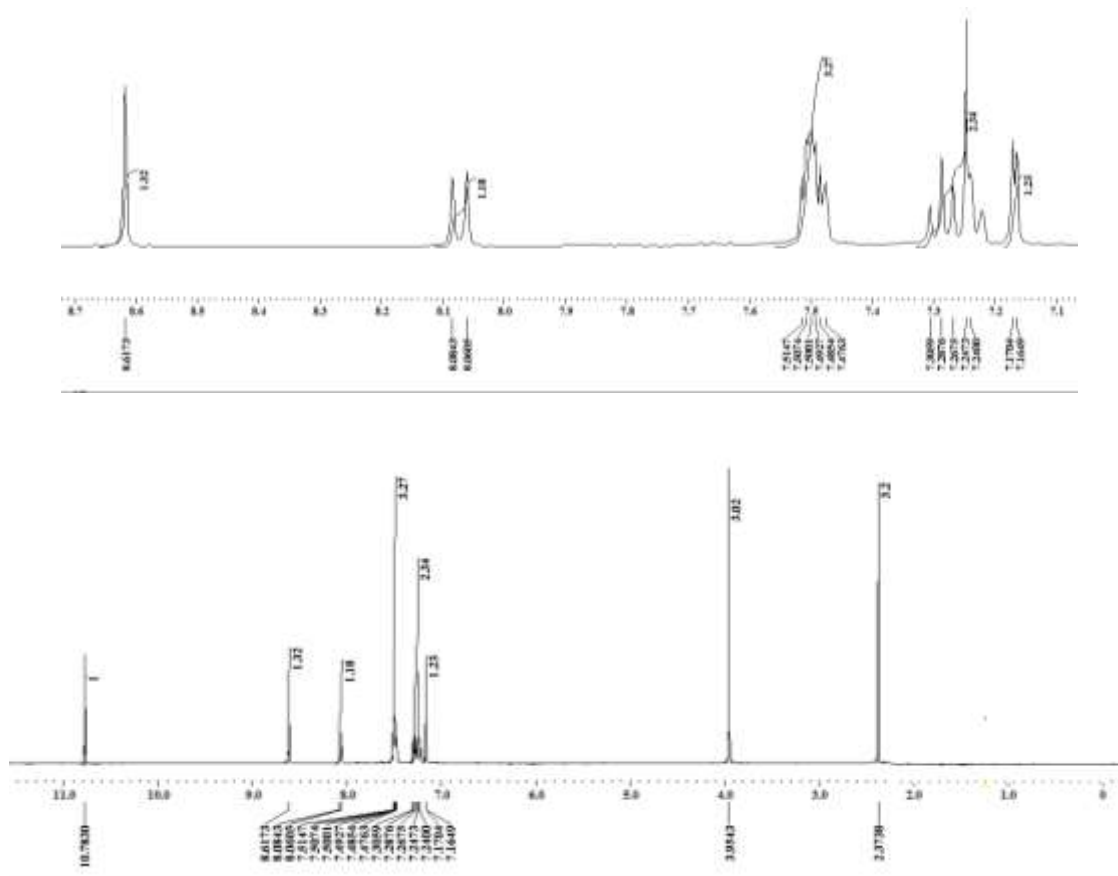



<sup>13</sup>C NMR

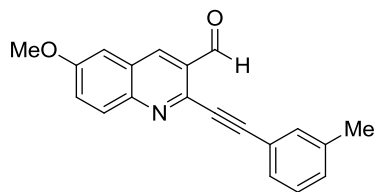

1m

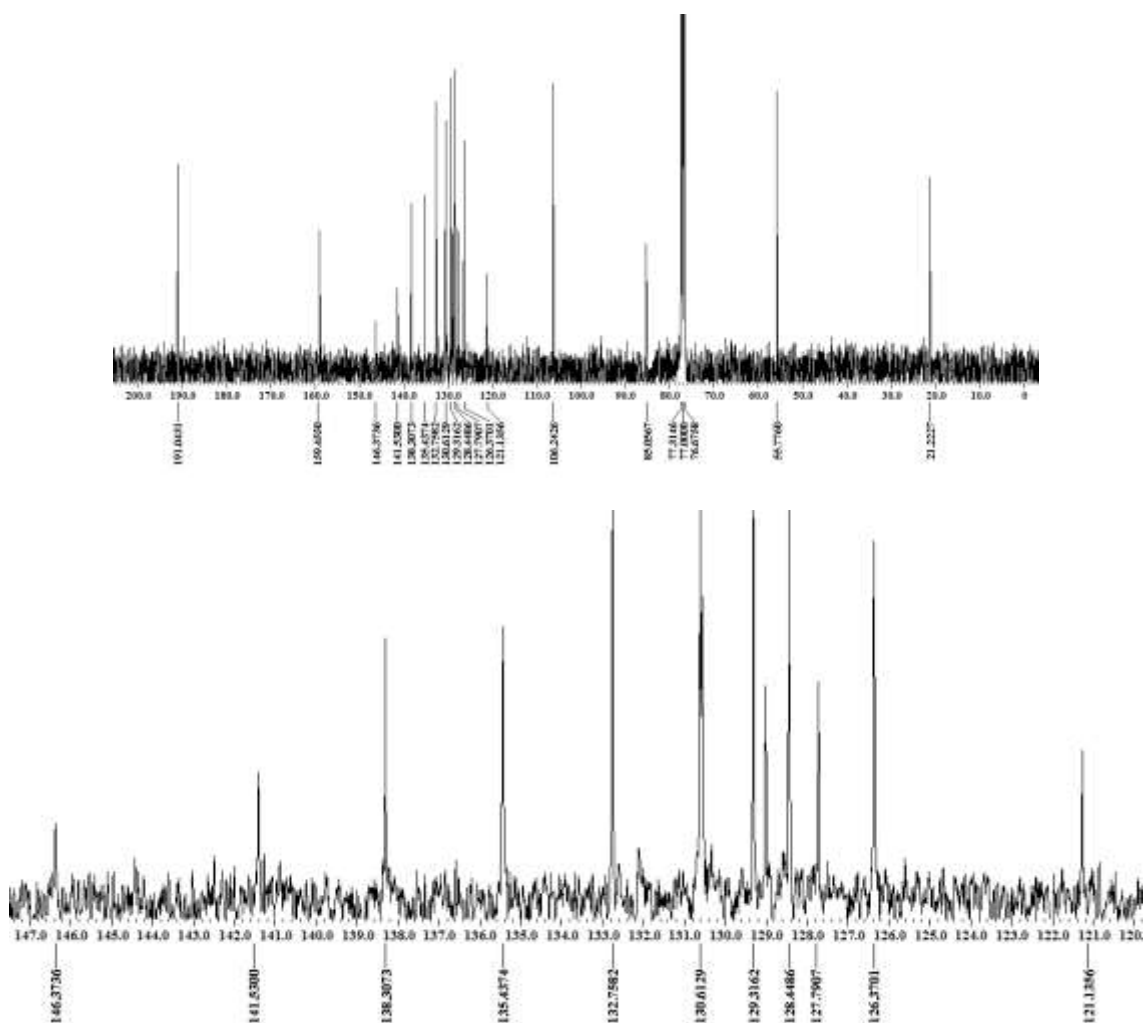

# <sup>1</sup>H NMR

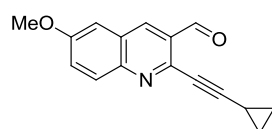

**1n**

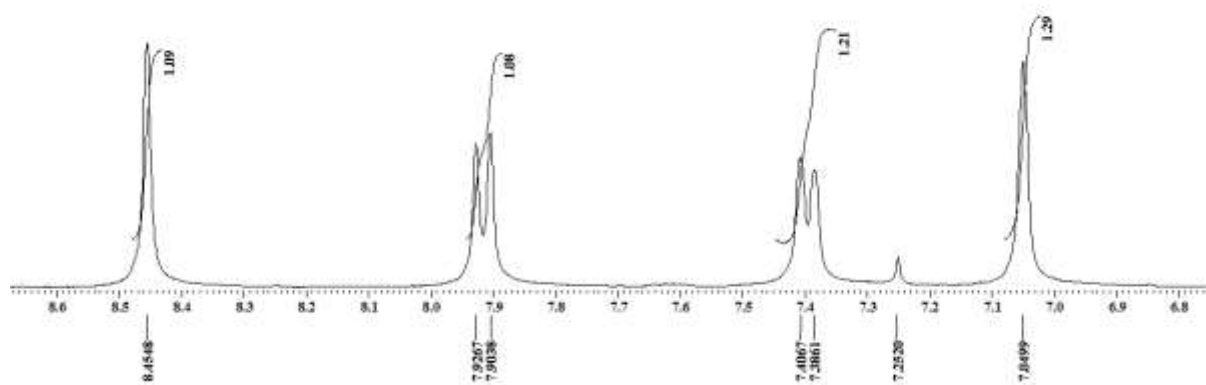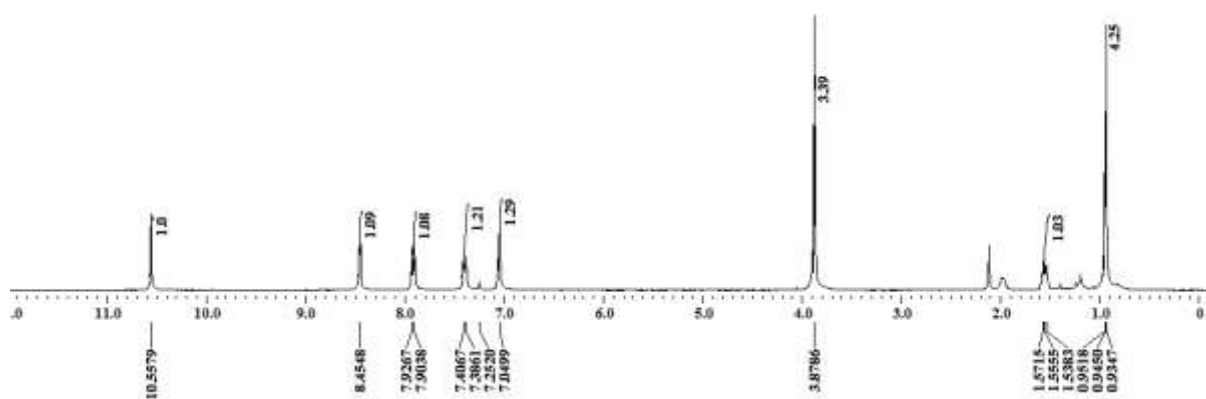

# <sup>13</sup>C NMR

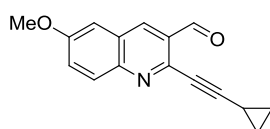

**1n**

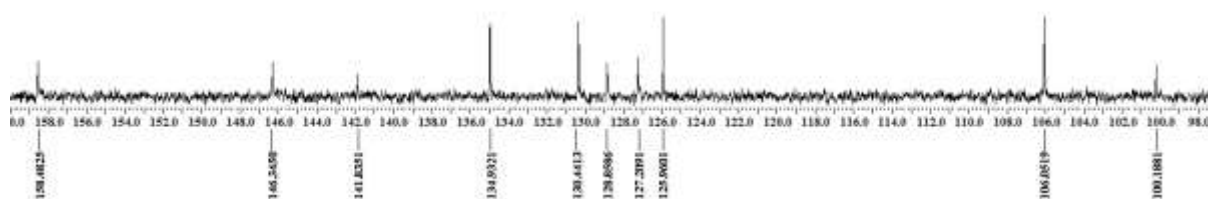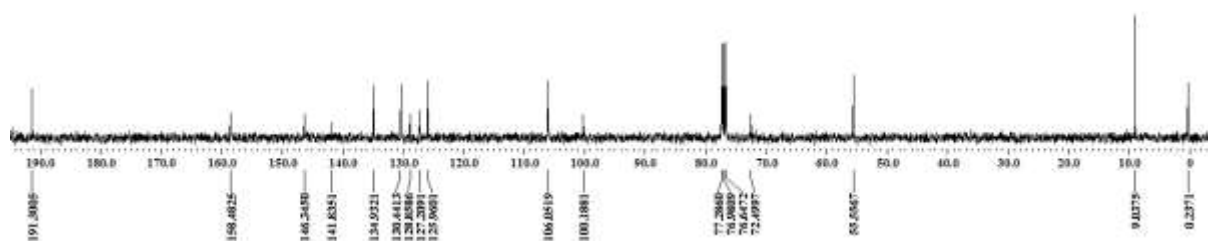

# <sup>1</sup>H NMR

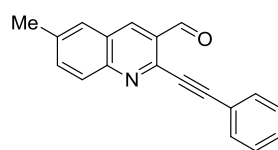

**10**

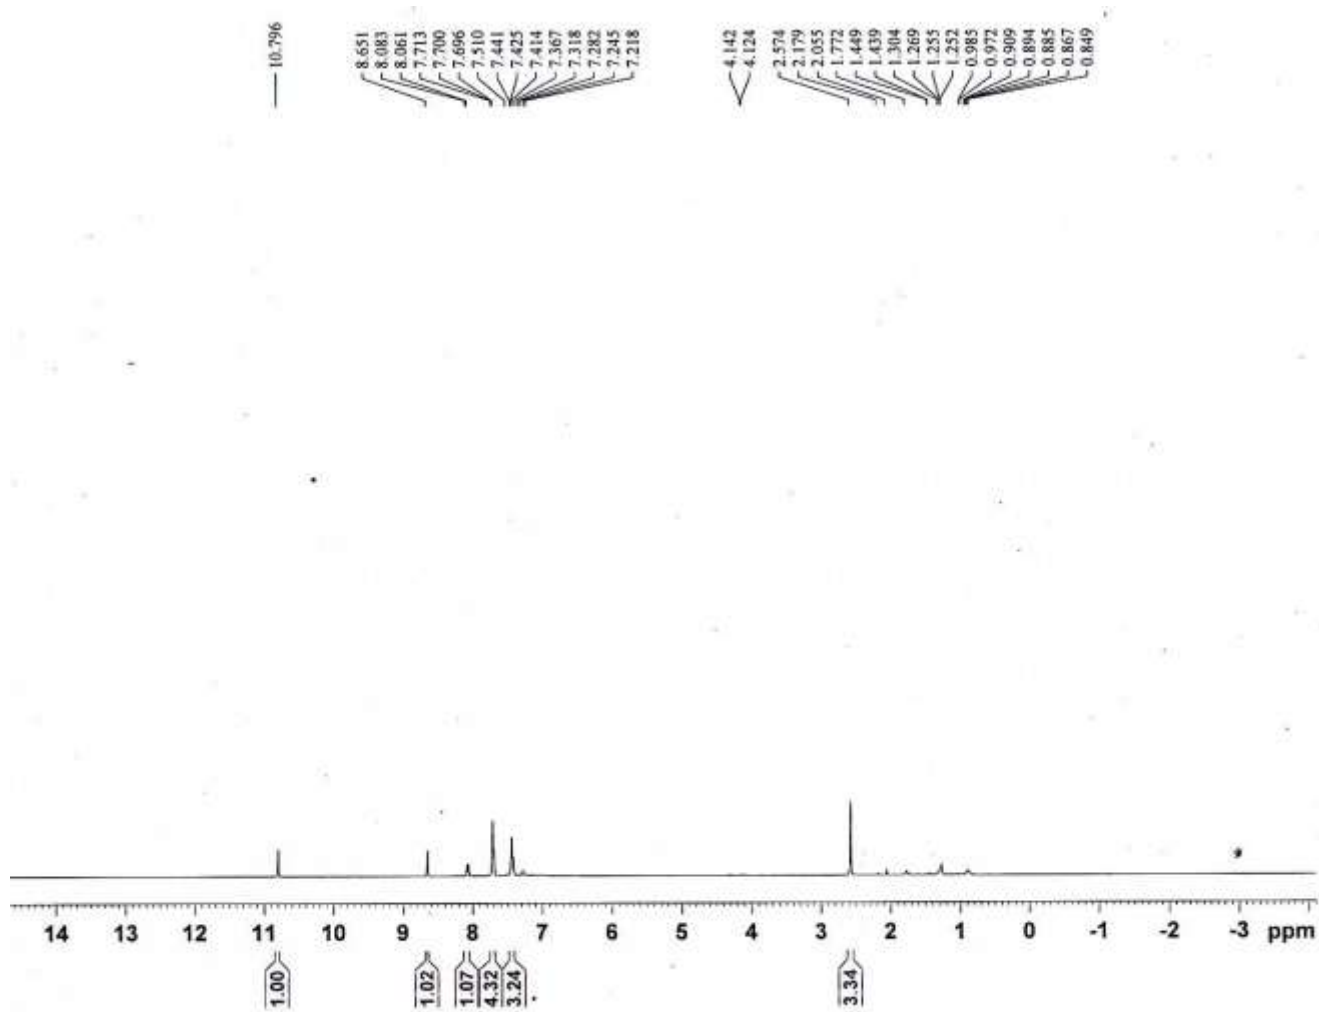

# <sup>13</sup>C NMR



**10**

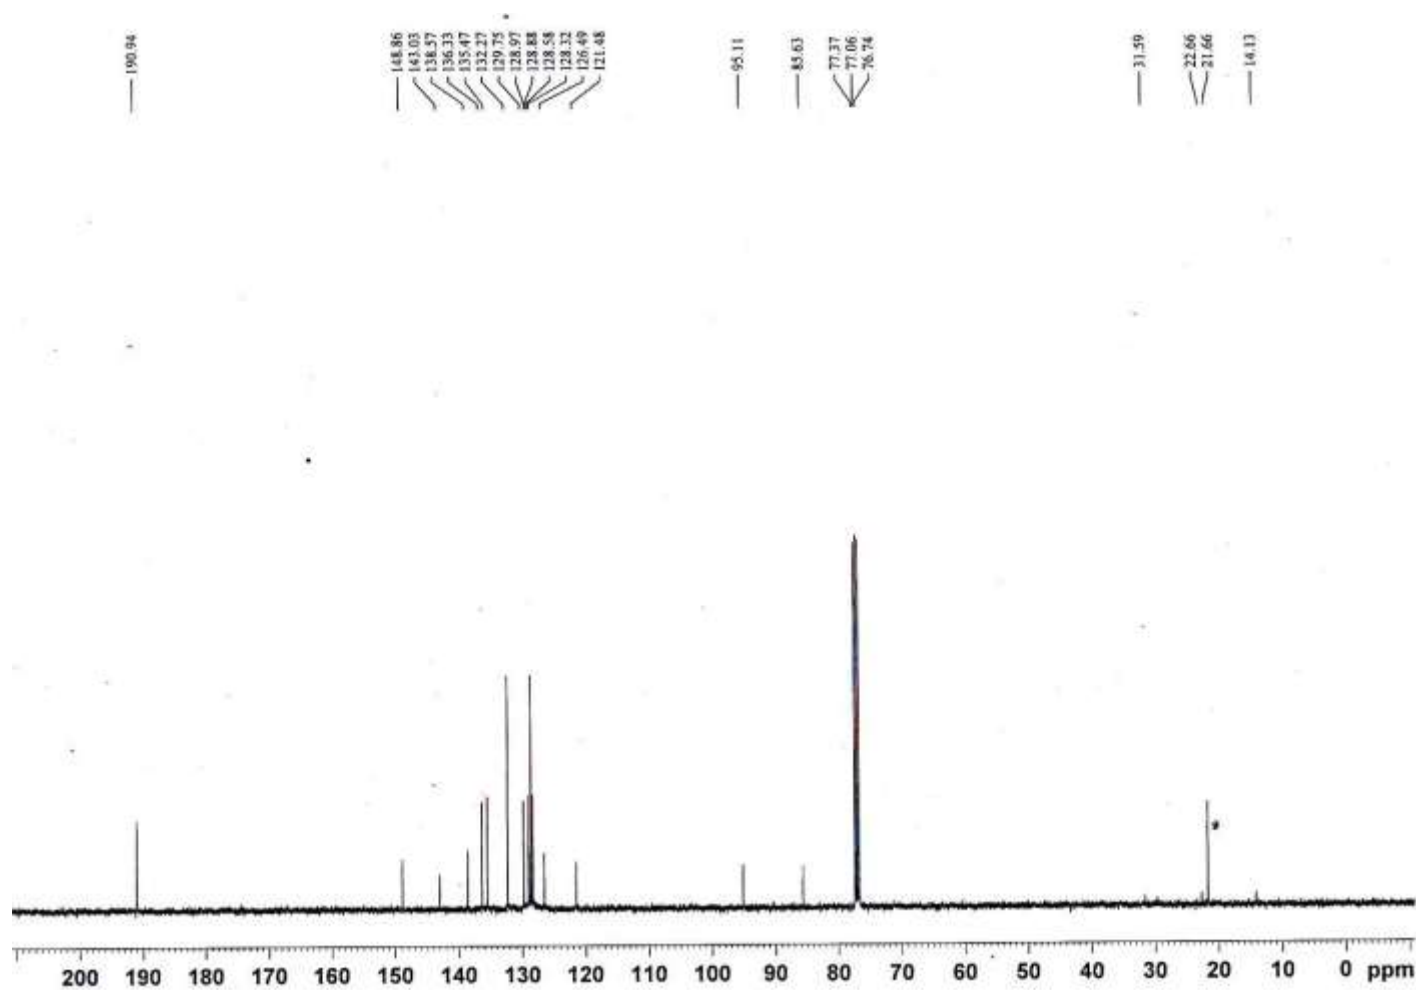

<sup>1</sup>H NMR

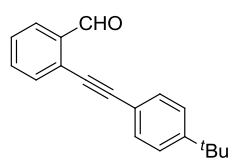

2

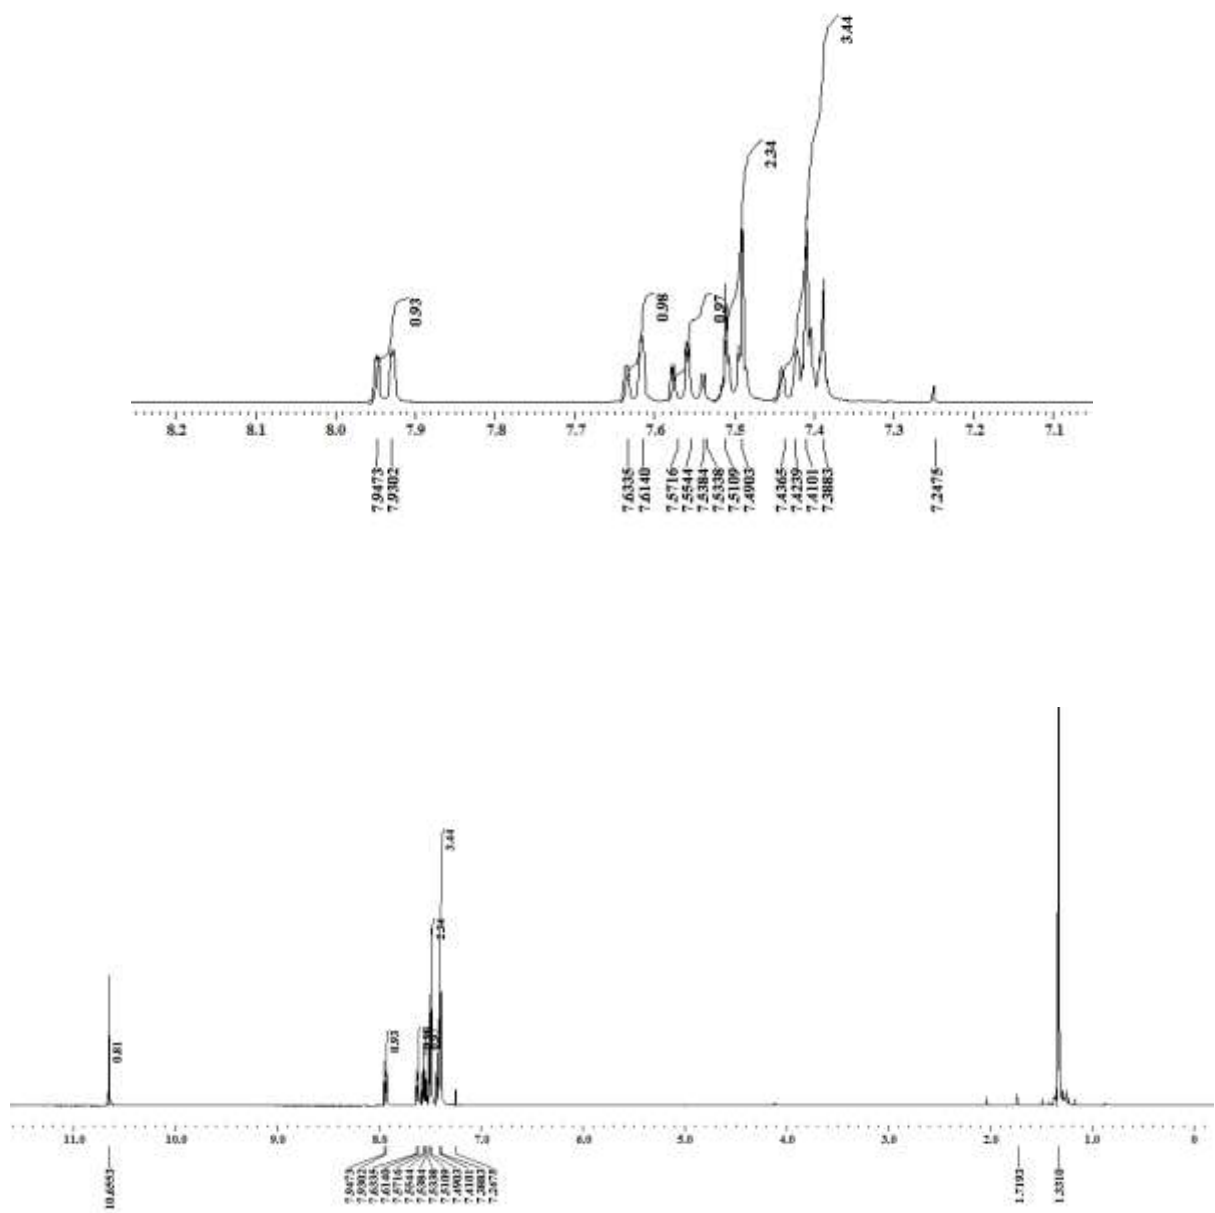

<sup>13</sup>C NMR

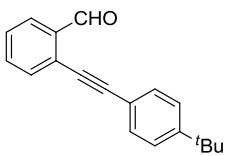

2

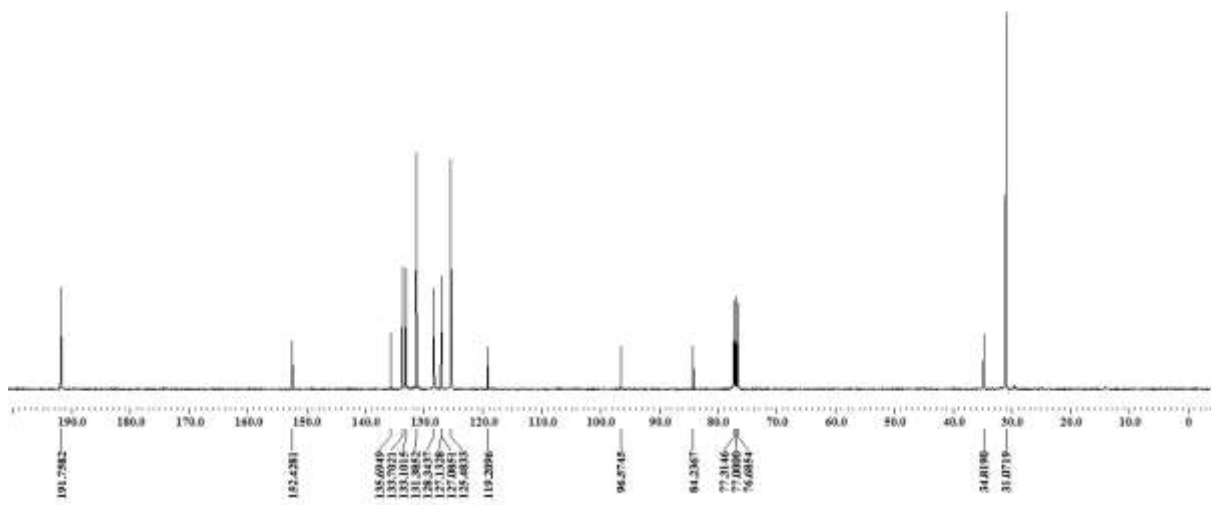

<sup>1</sup>H NMR

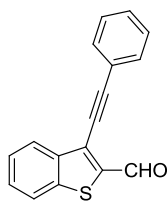

3a

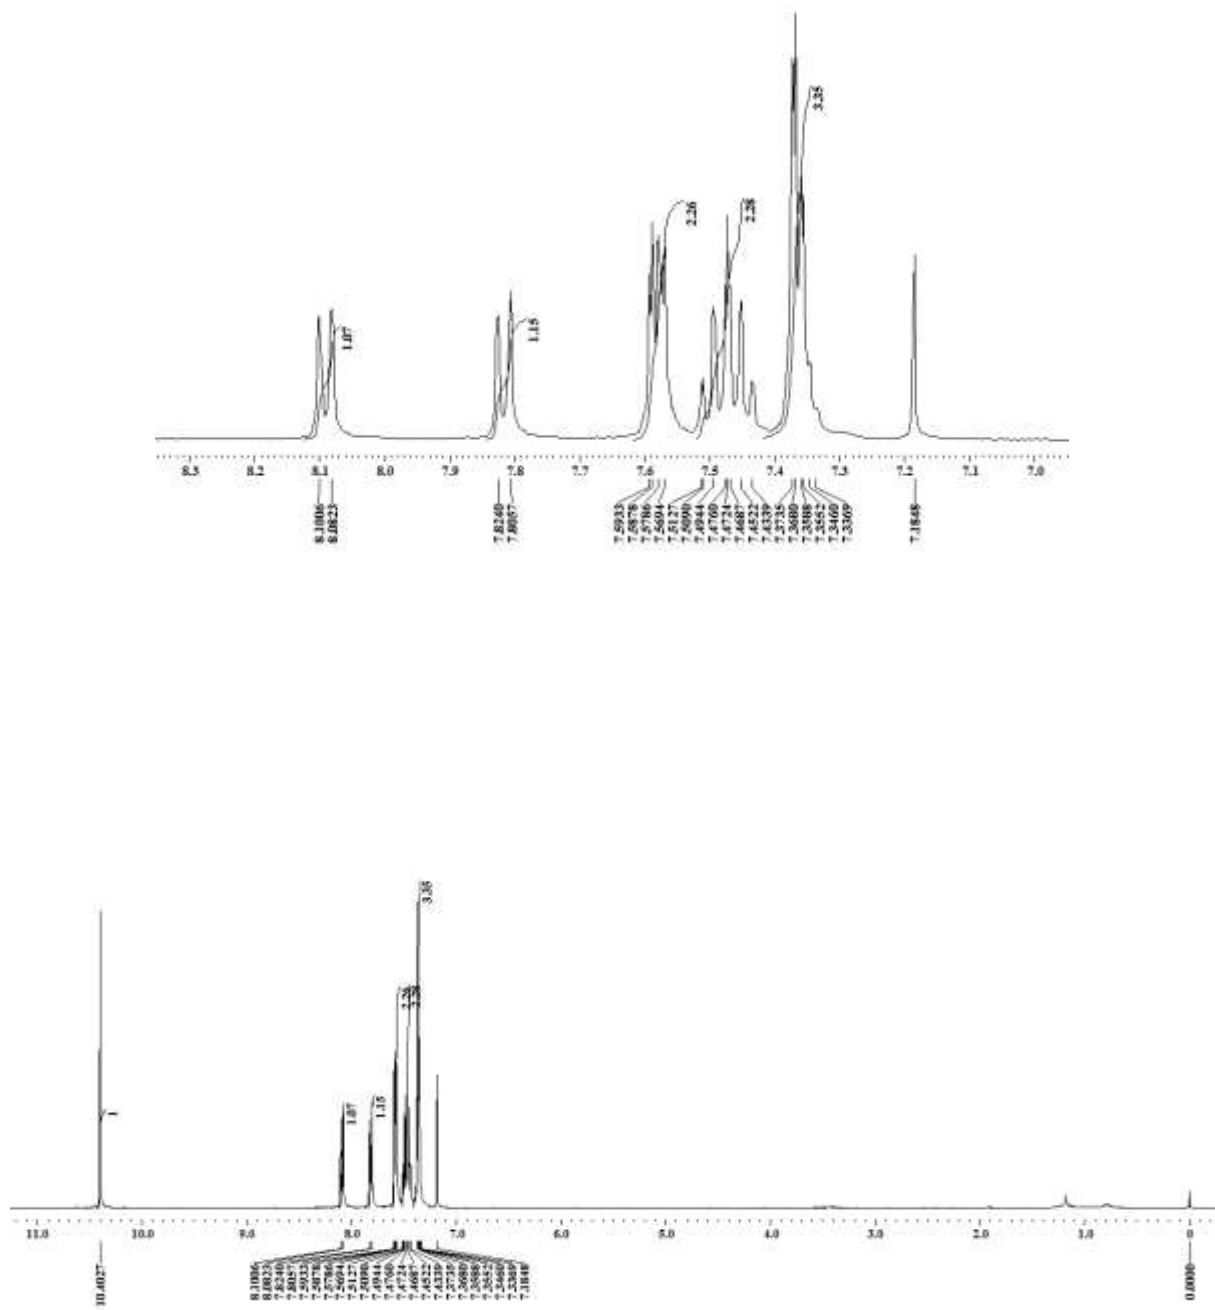



<sup>13</sup>C NMR

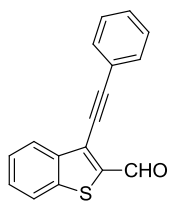

**3a**

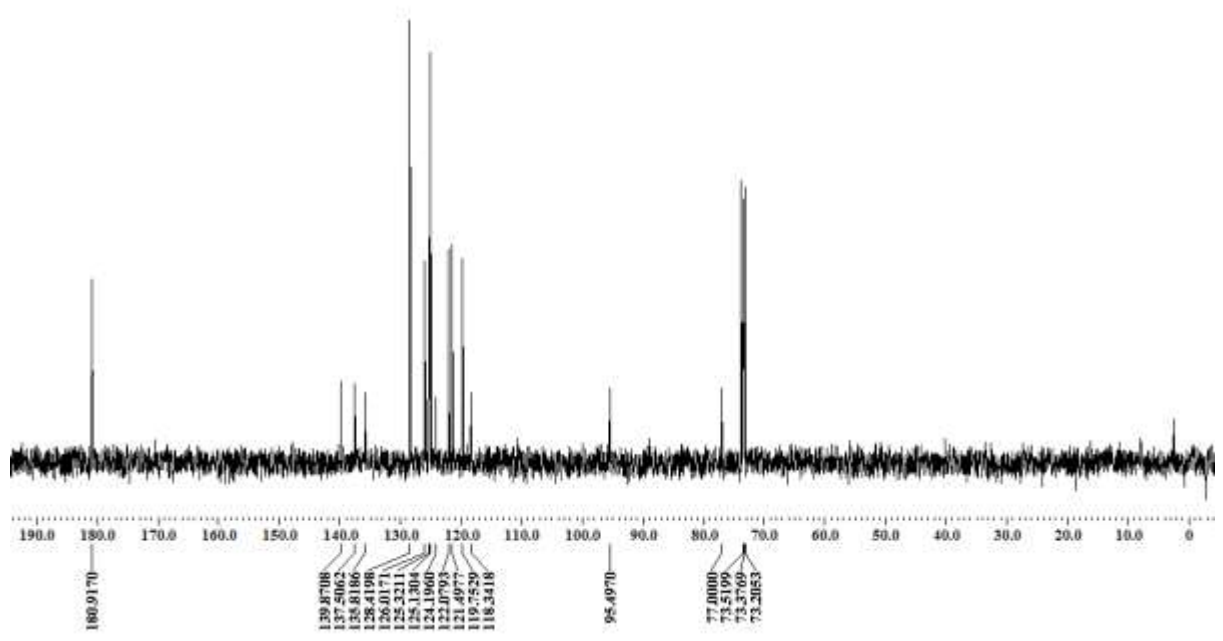

# <sup>1</sup>H NMR

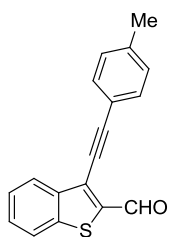

**3b**

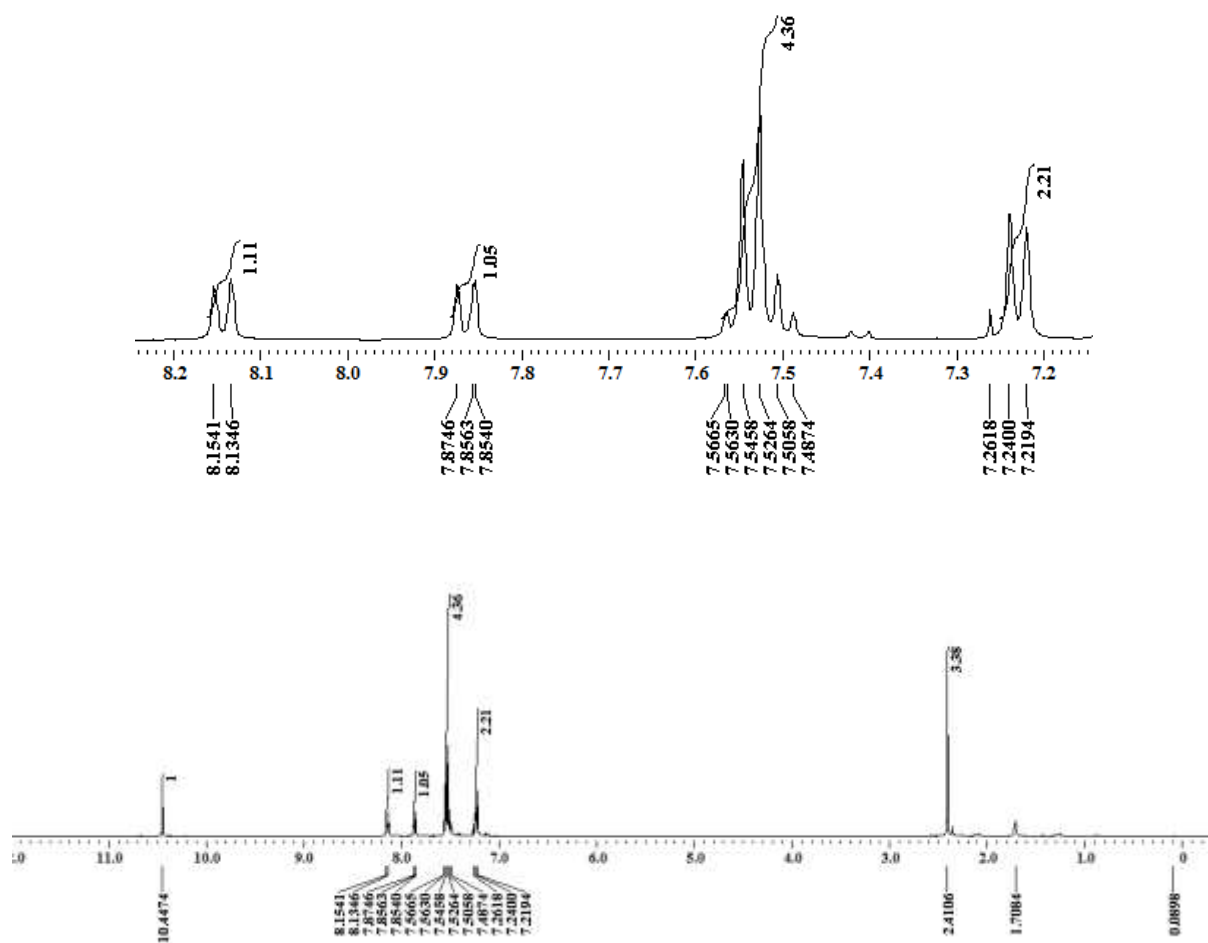

<sup>13</sup>C NMR

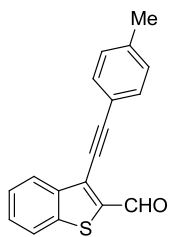

3b

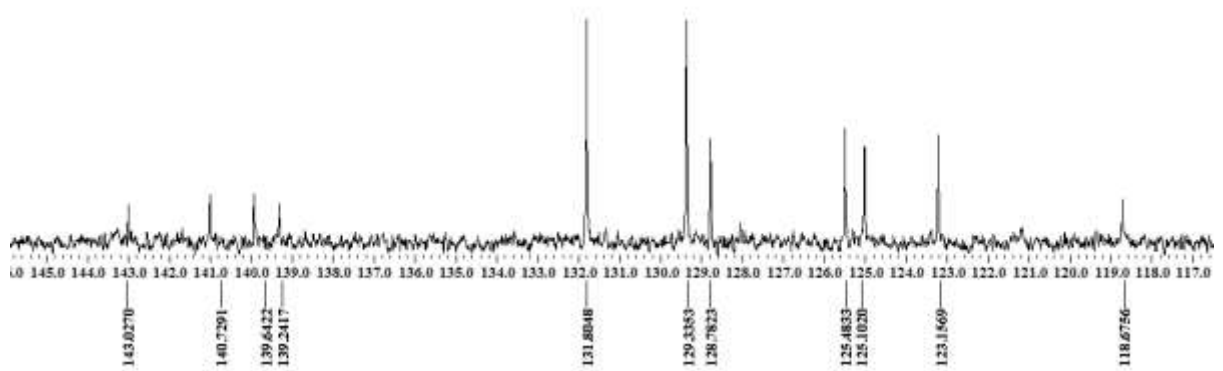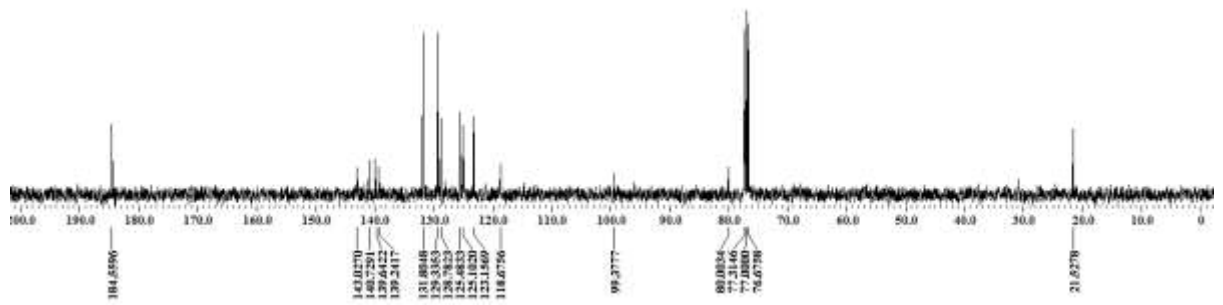

# <sup>1</sup>H NMR

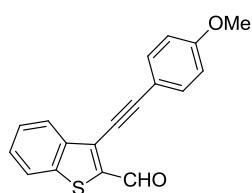

**3c**

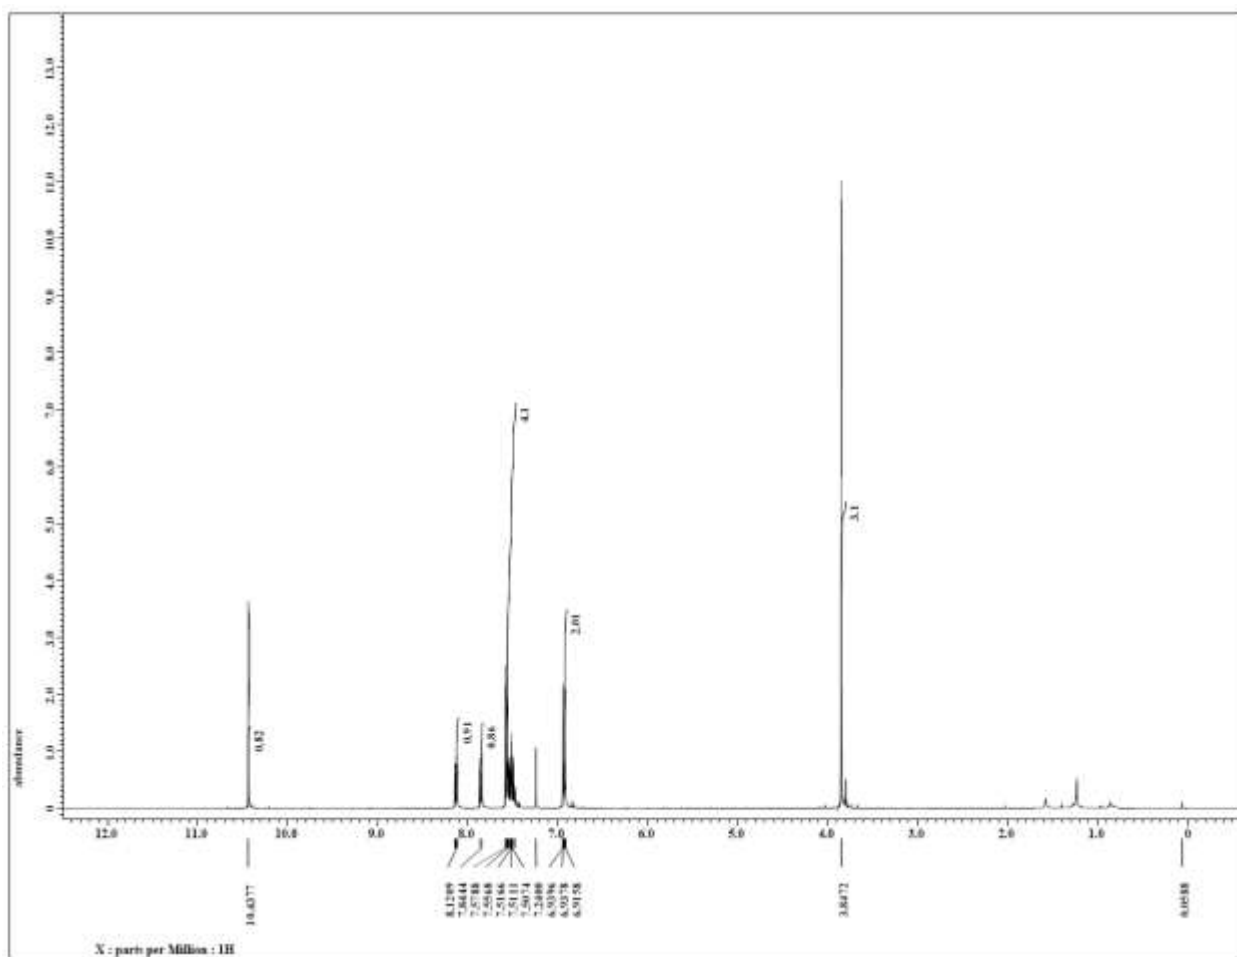

# <sup>13</sup>C NMR

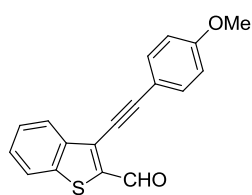

**3c**

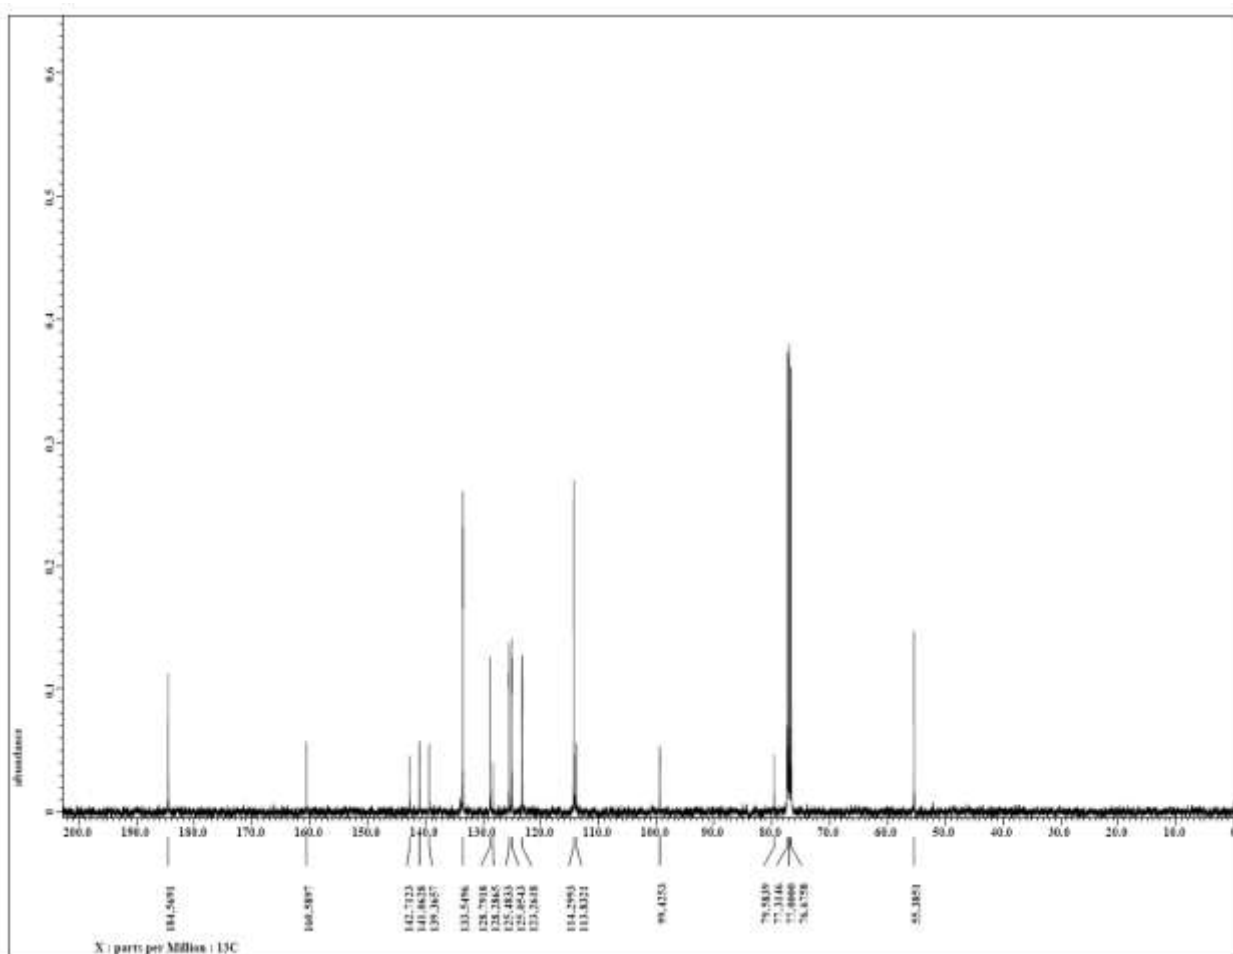

<sup>1</sup>H NMR

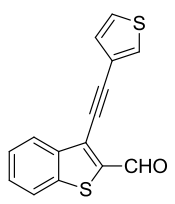

3d

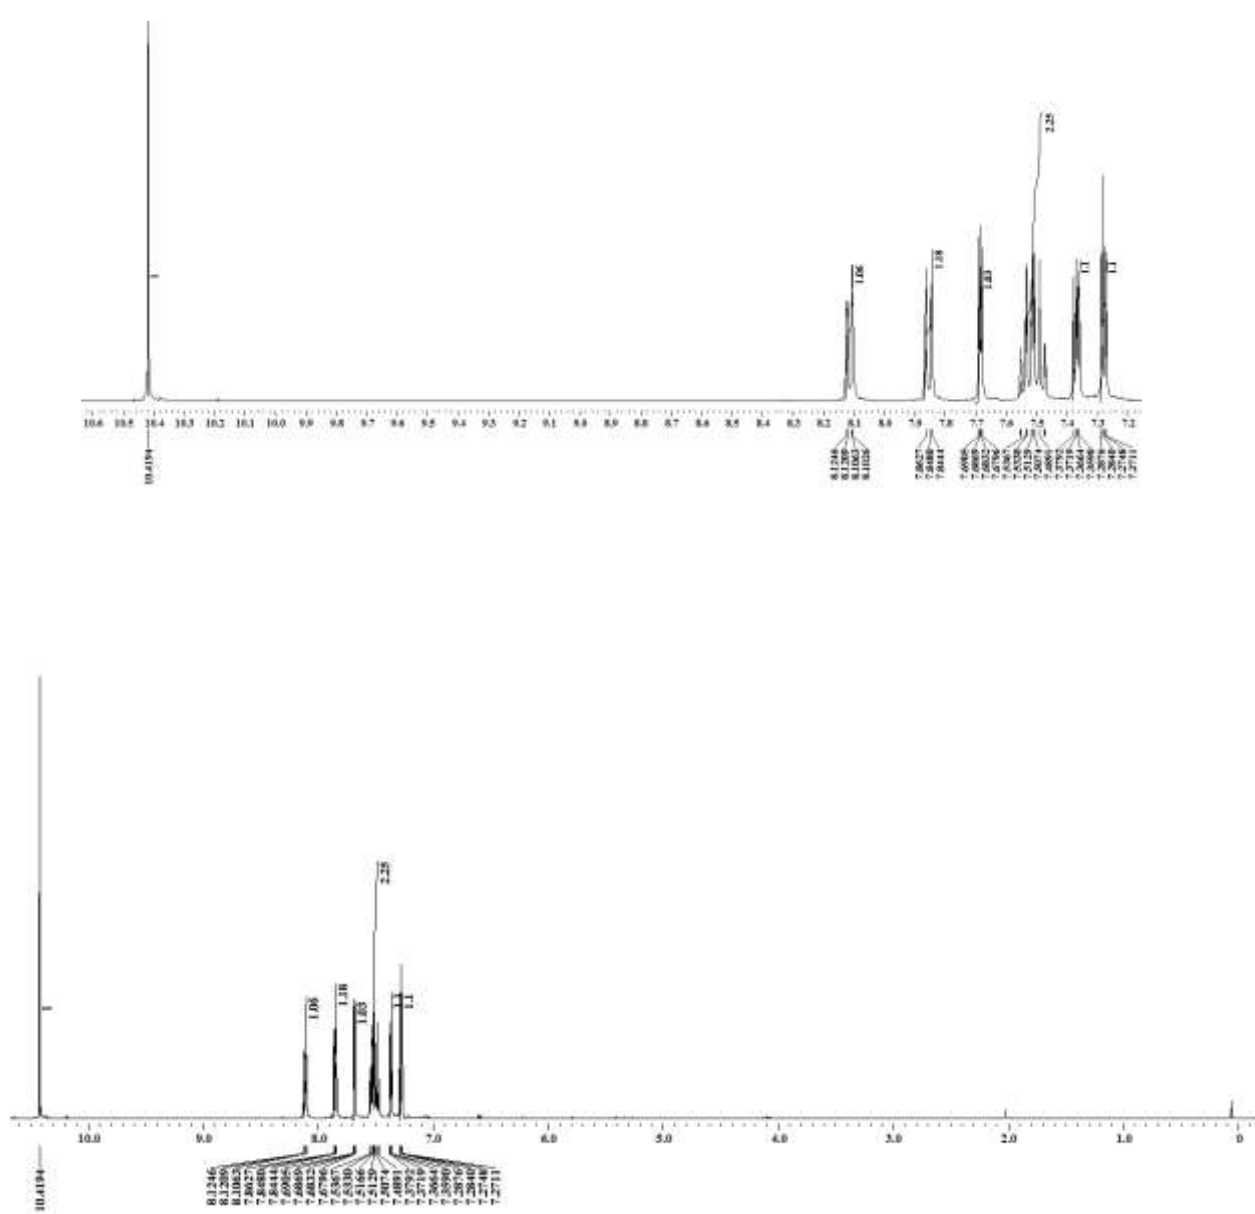

# <sup>13</sup>C NMR

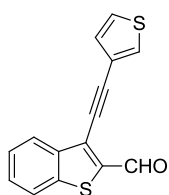

**3d**

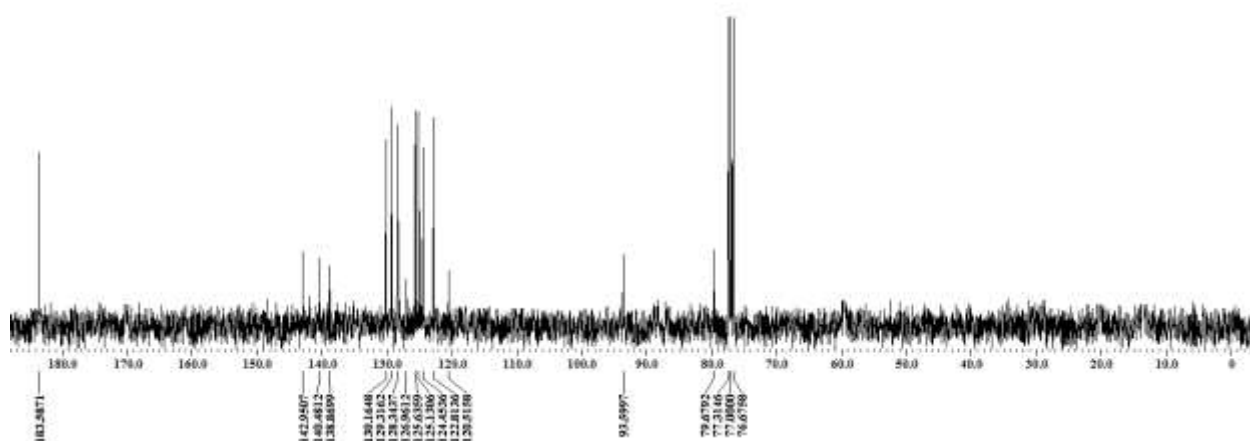

<sup>1</sup>H NMR

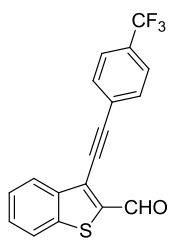

3e

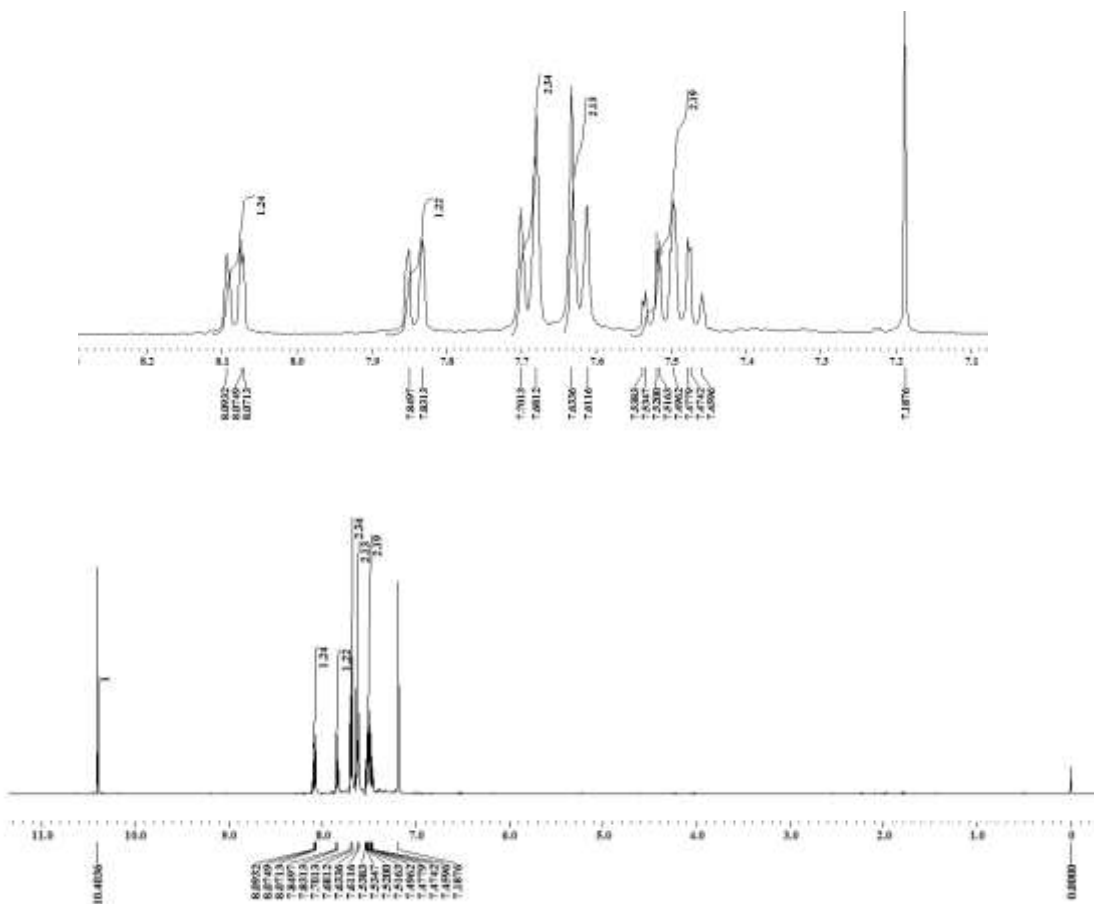



# <sup>13</sup>C NMR

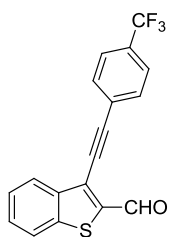

**3e**

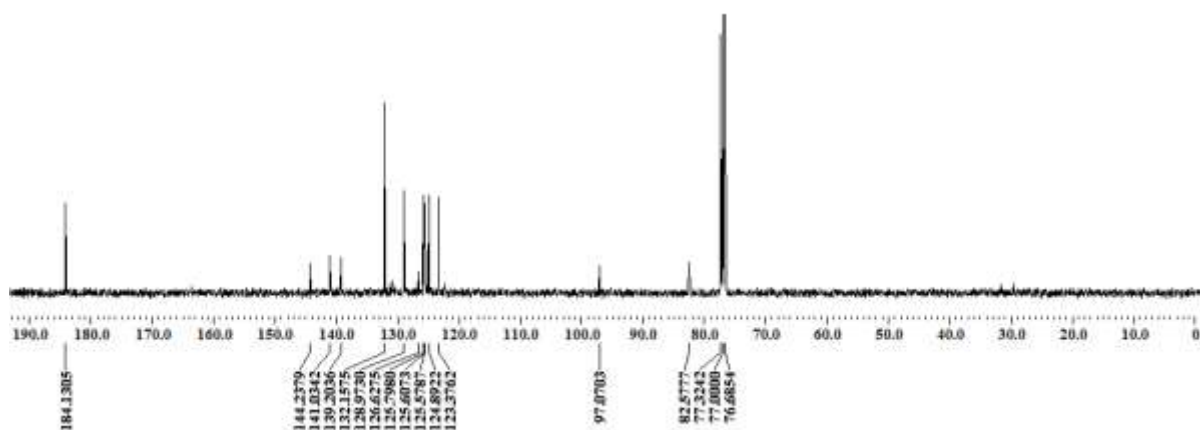

# <sup>1</sup>H NMR

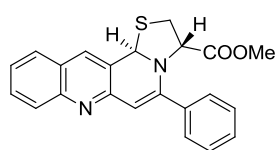

**5a**

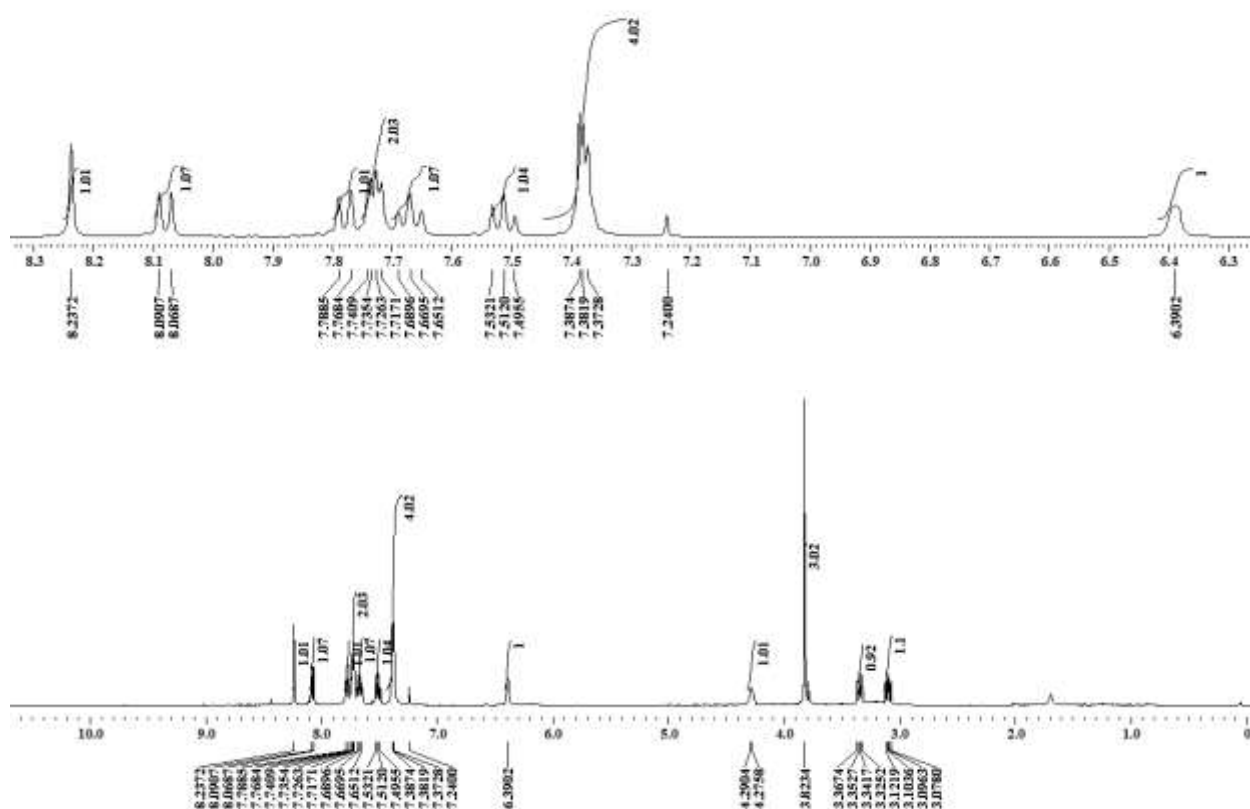

# <sup>13</sup>C NMR

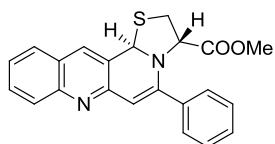

**5a**

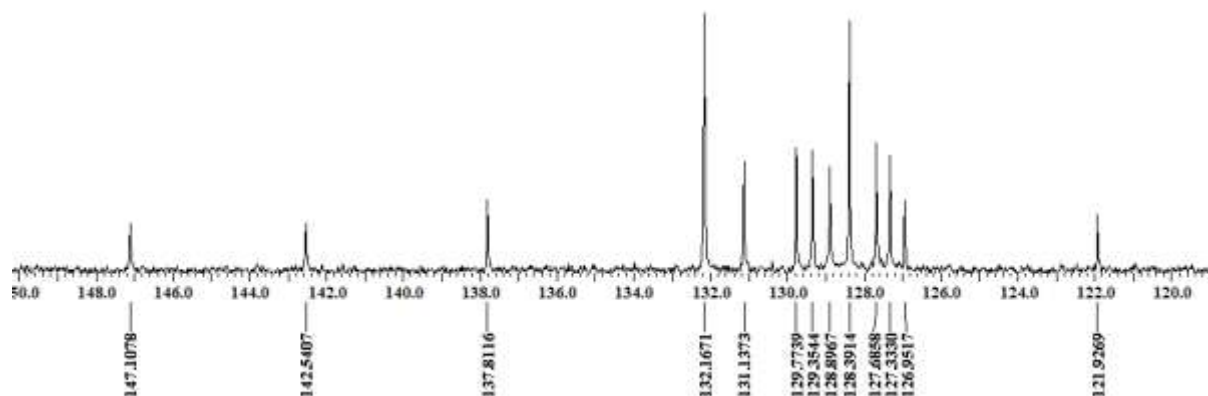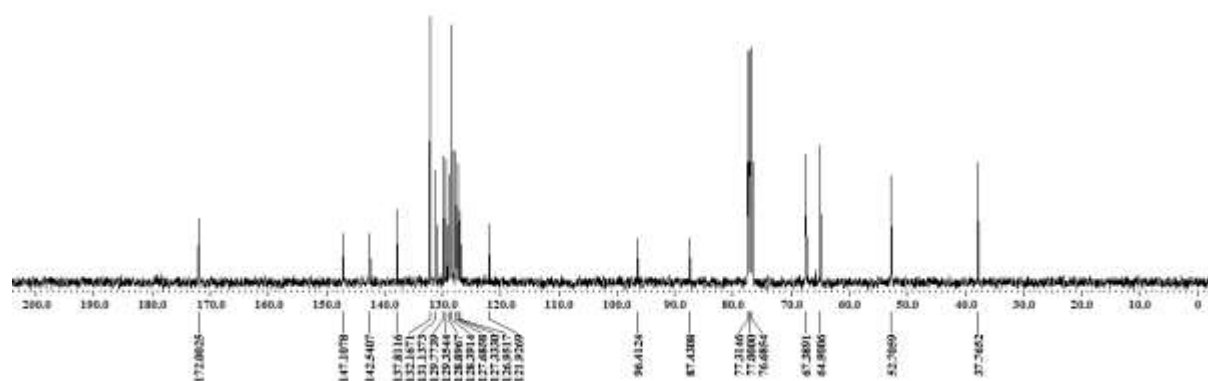

# <sup>1</sup>H NMR

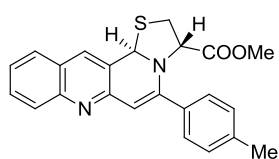

**5b**

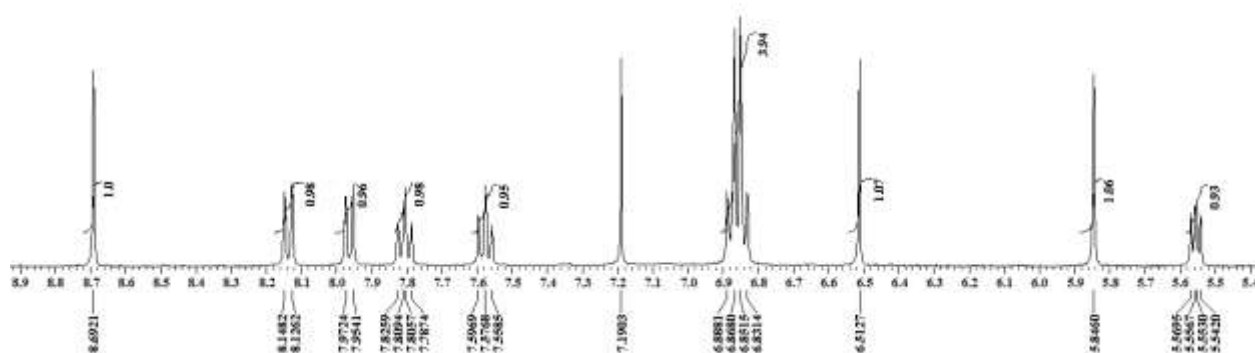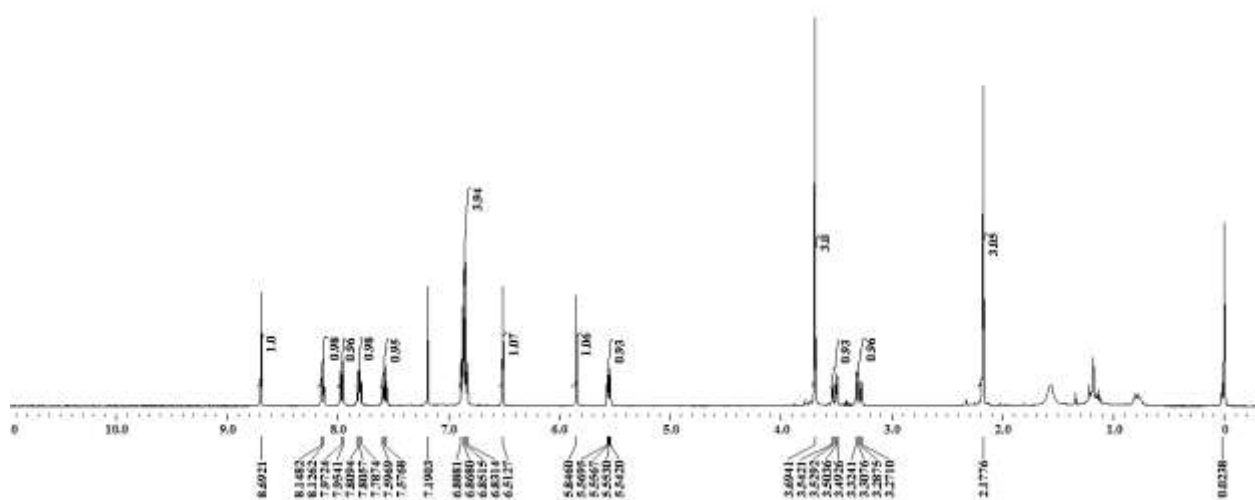

# <sup>13</sup>C NMR

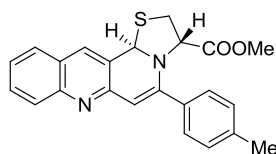

**5b**

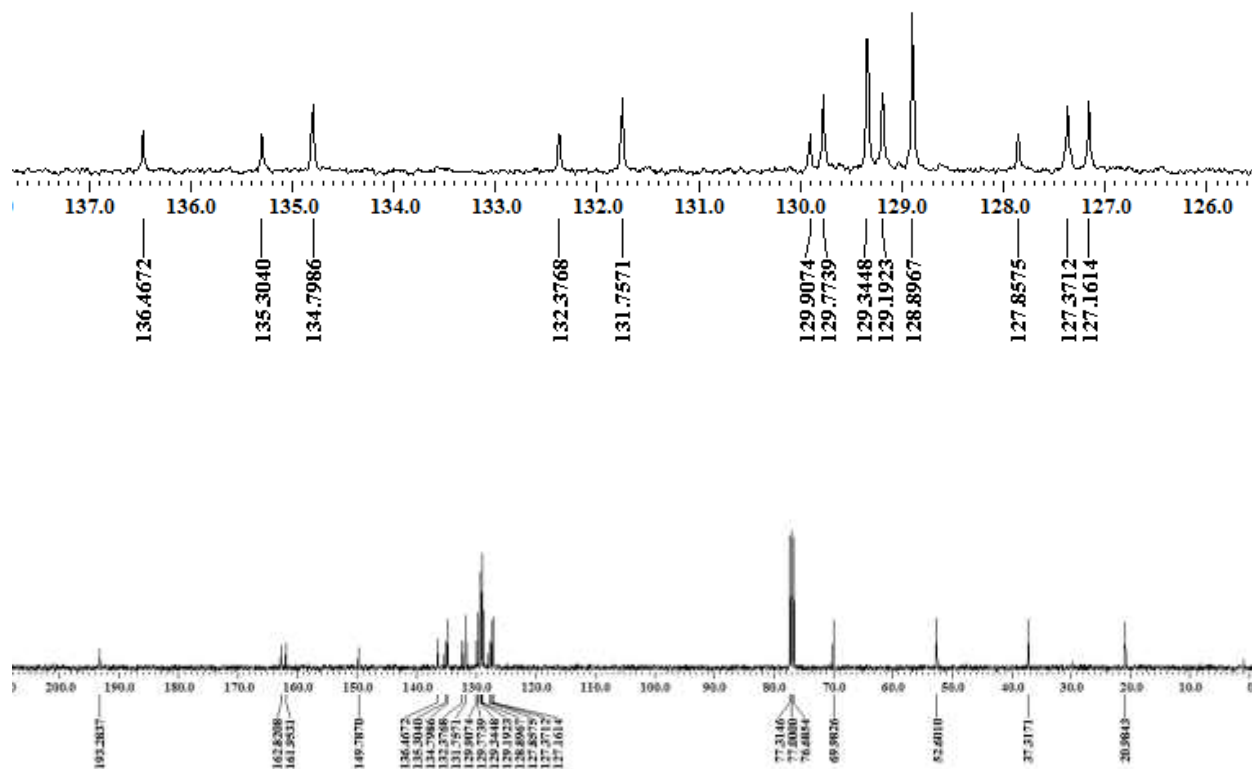

# <sup>1</sup>H NMR

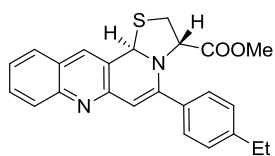

**5c**

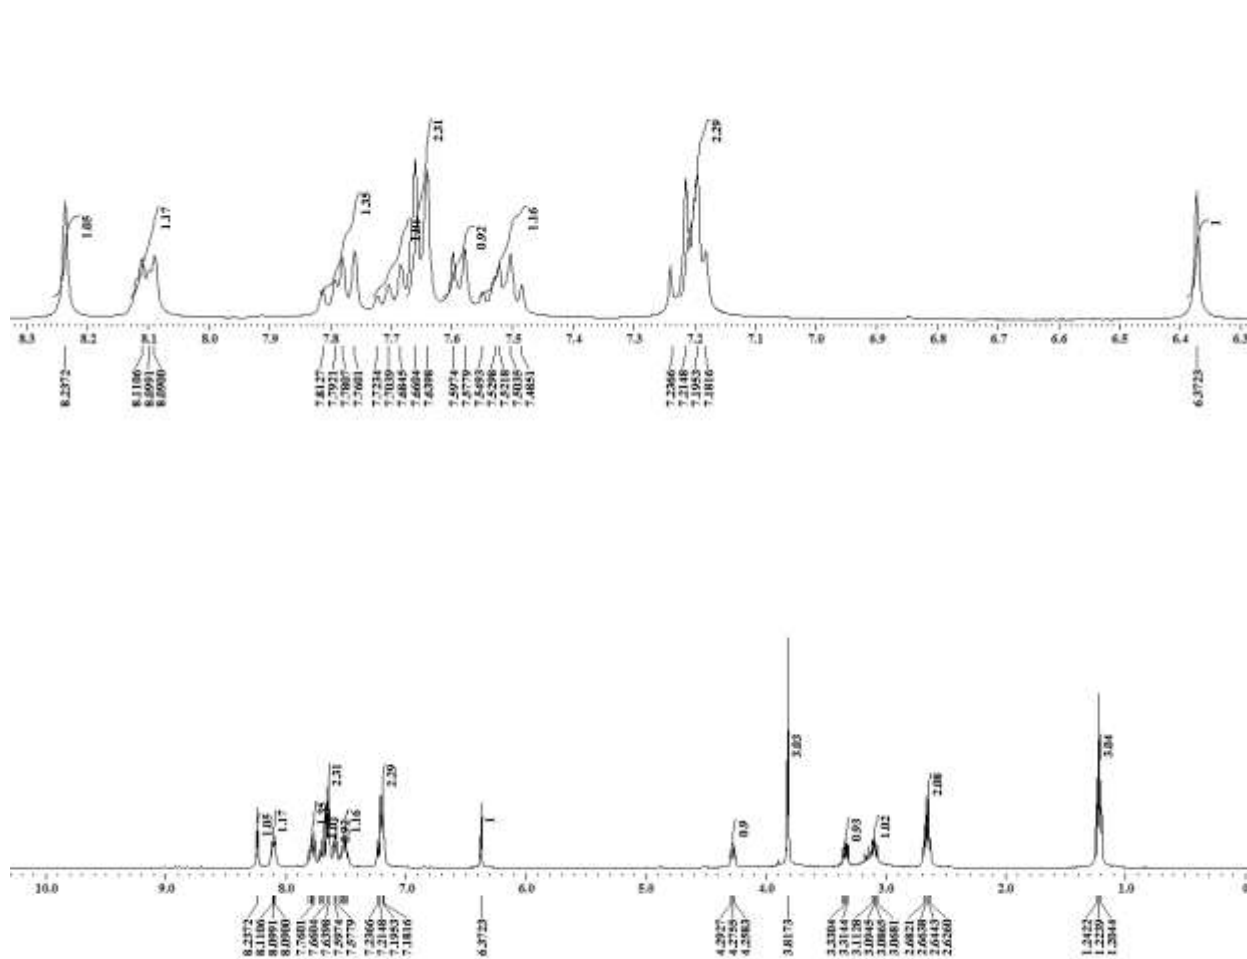

# <sup>13</sup>C NMR

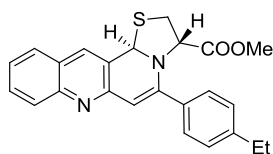

5c

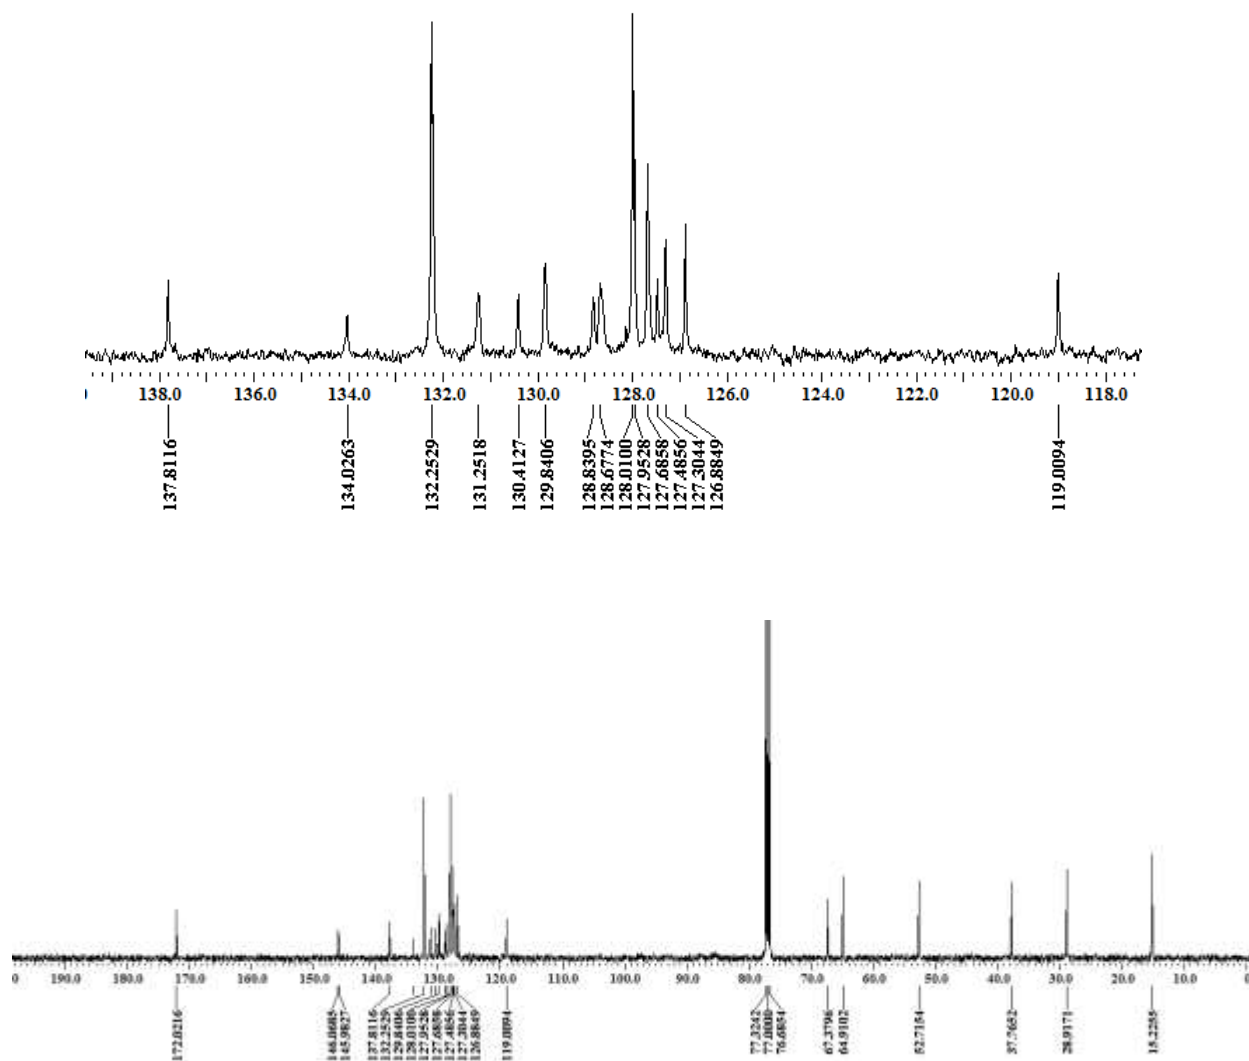

# <sup>1</sup>H NMR

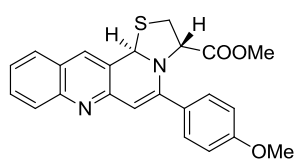

**5d**

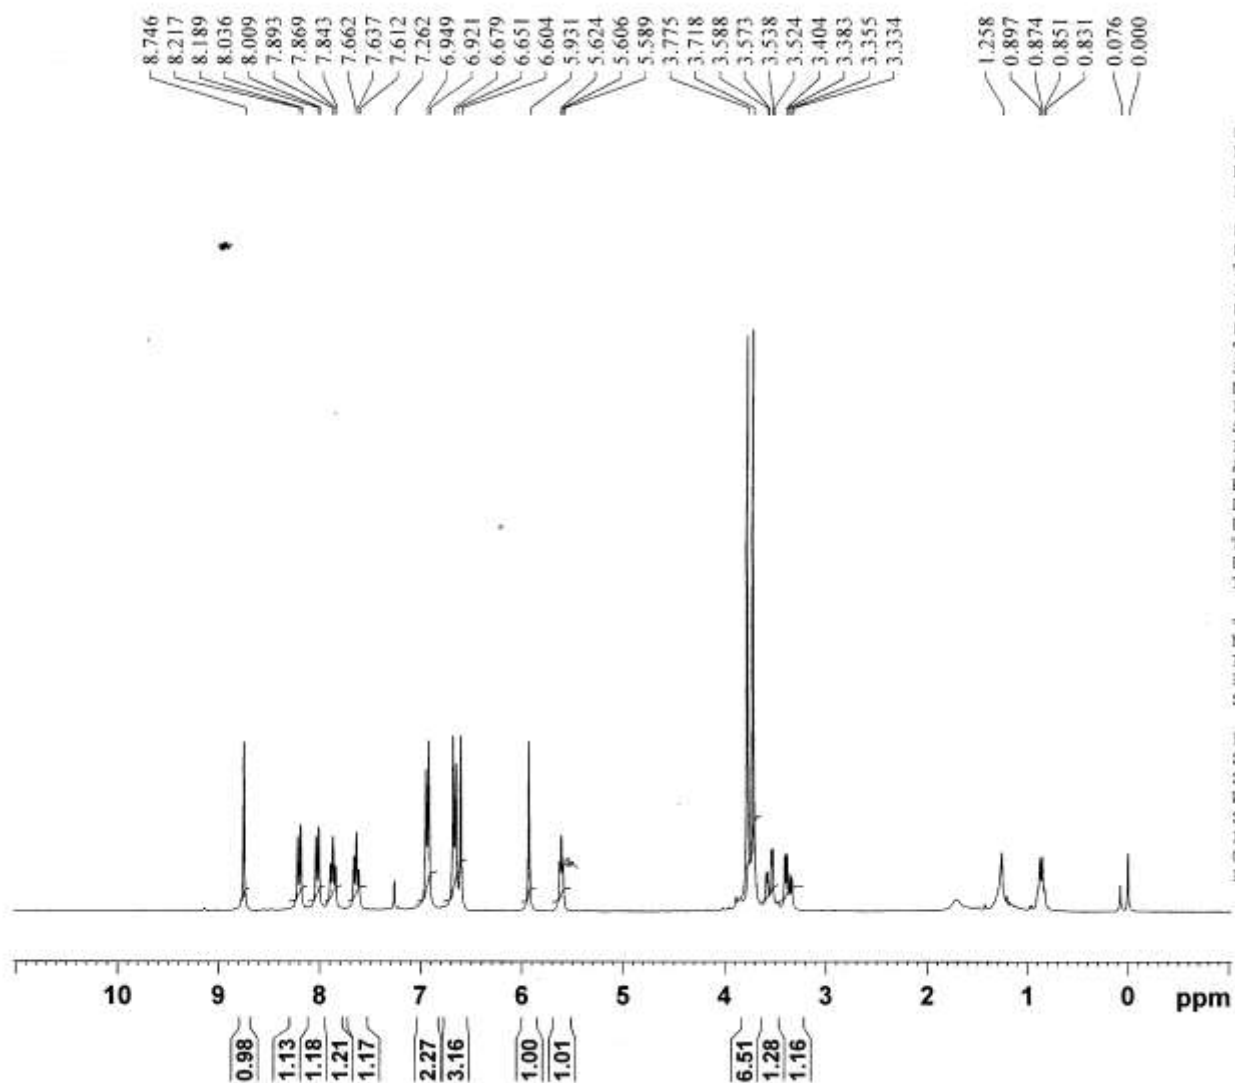



# <sup>13</sup>C NMR

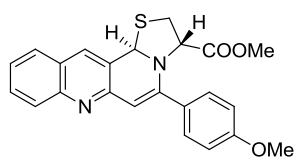

**5d**

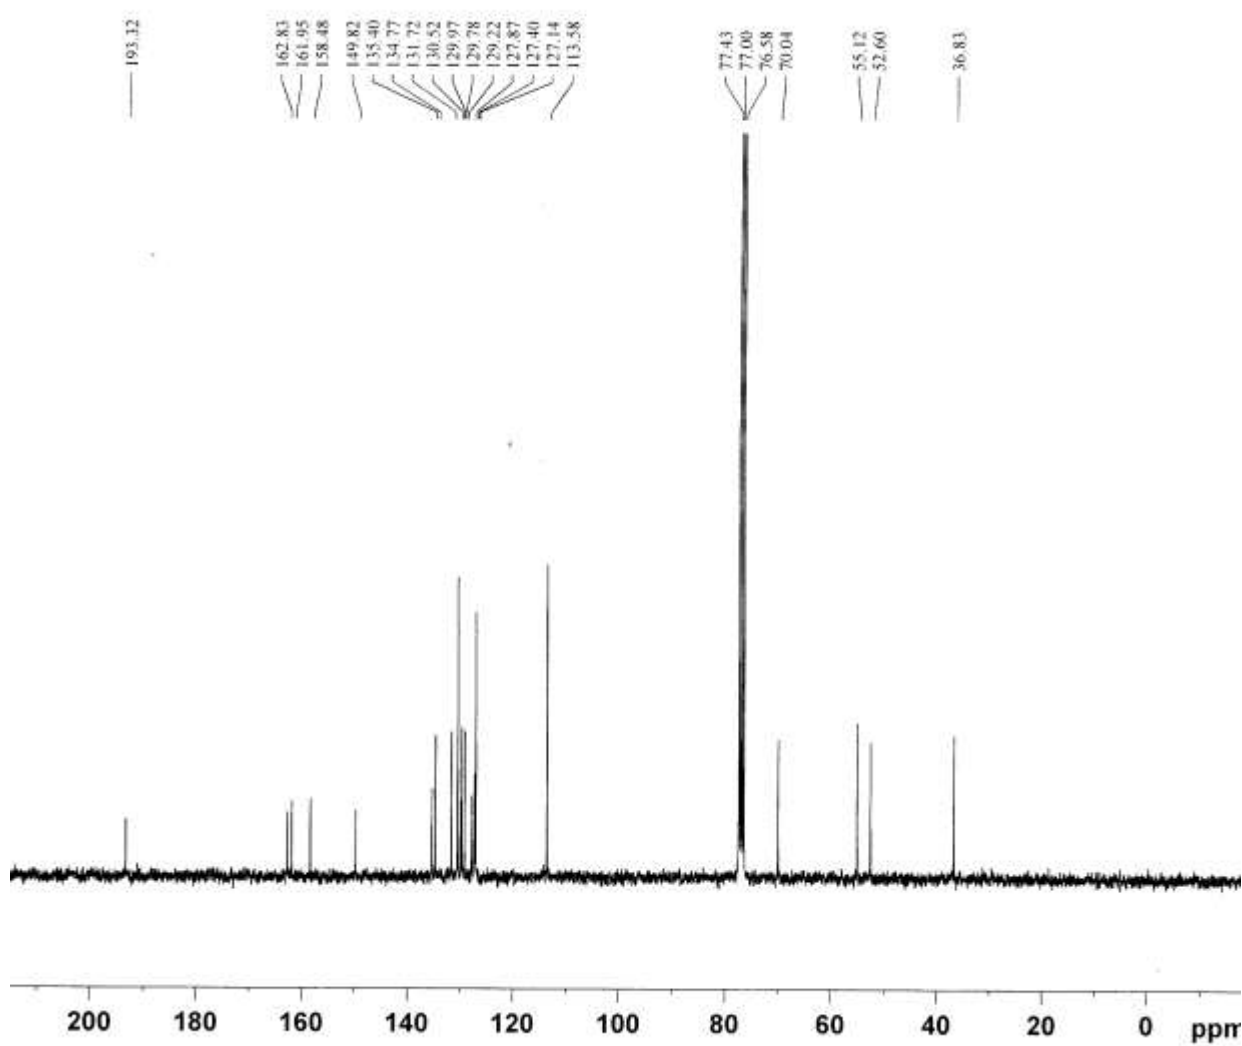

# <sup>1</sup>H NMR

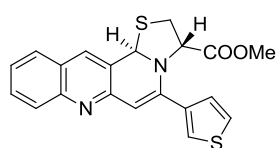

5e

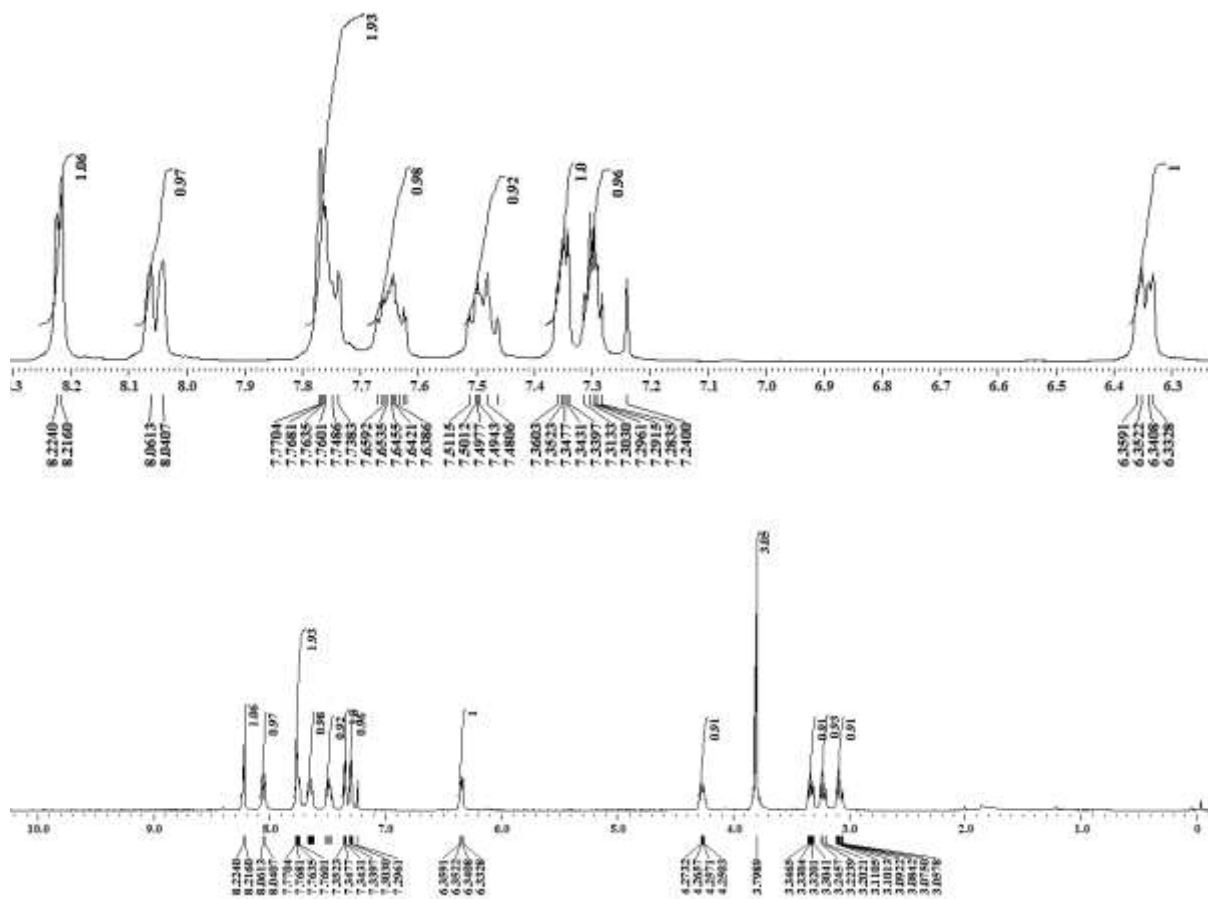

<sup>13</sup>C NMR

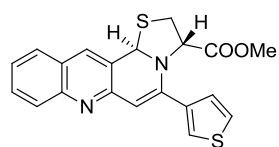

5e

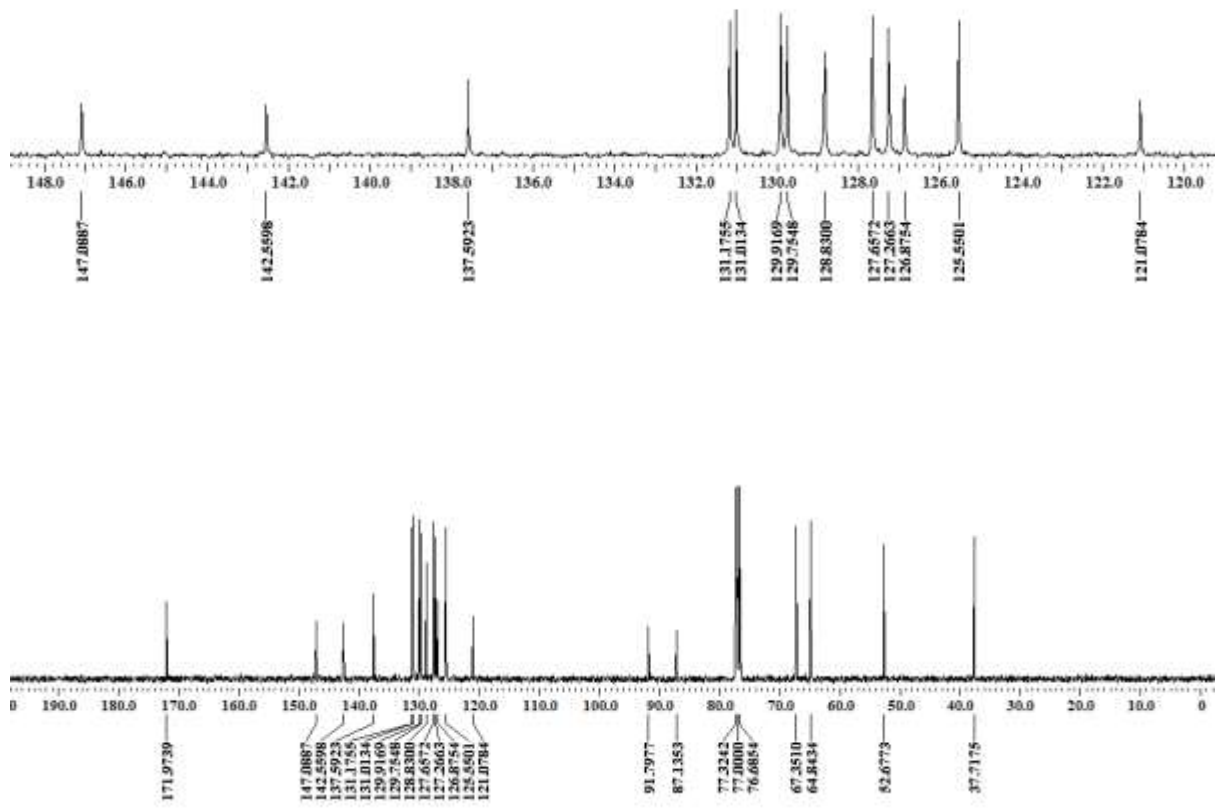

# <sup>1</sup>H NMR

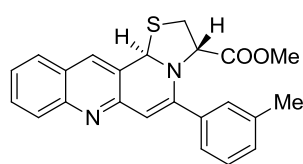

**5f**

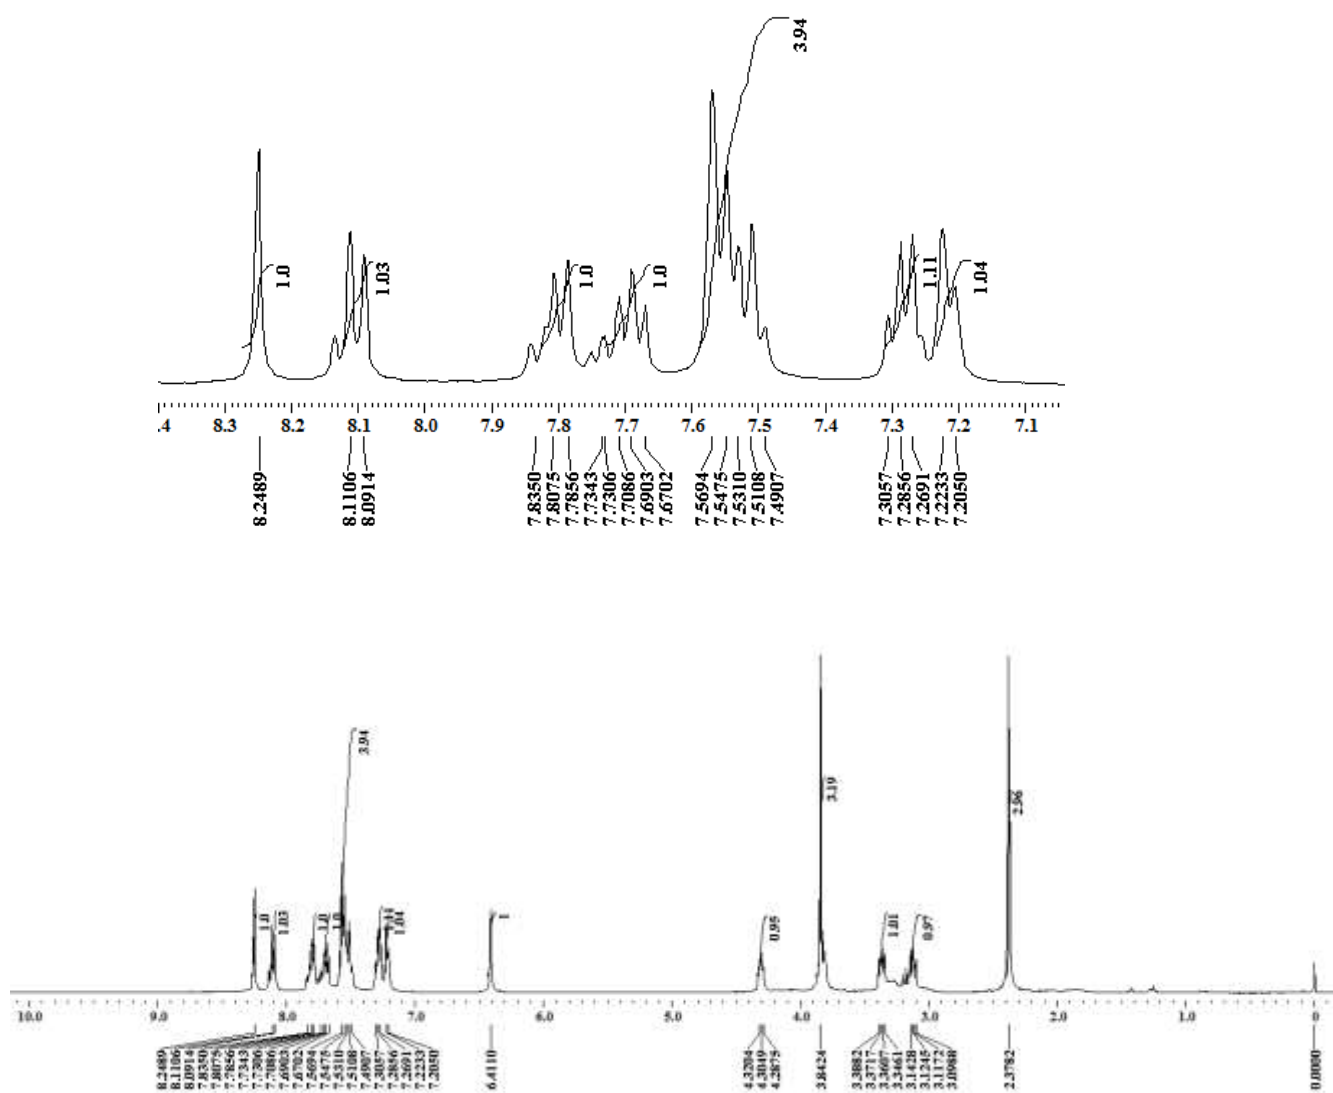

# <sup>13</sup>C NMR

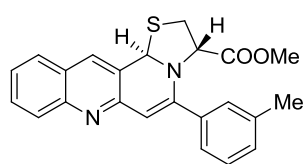

**5f**

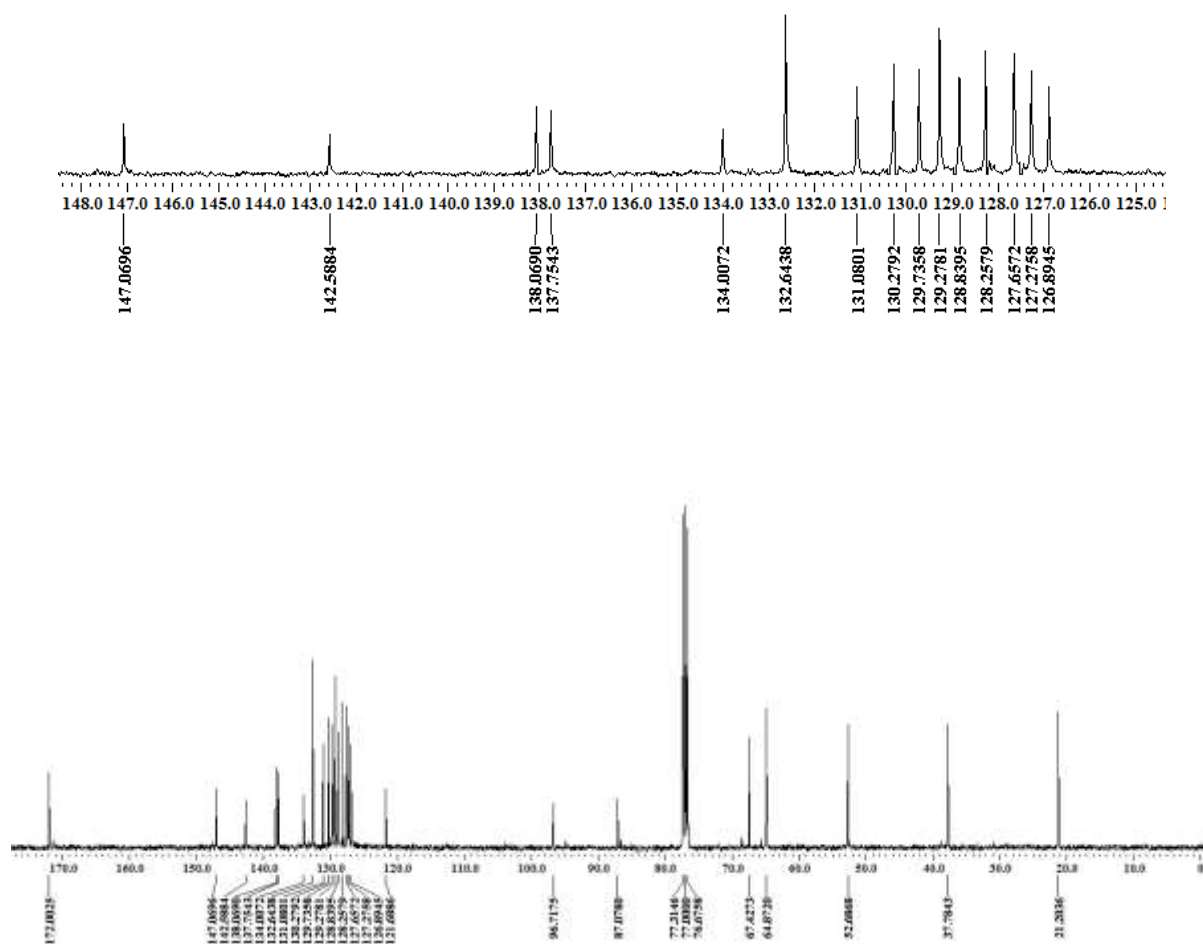

# <sup>1</sup>H NMR

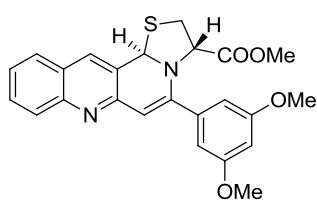

5g

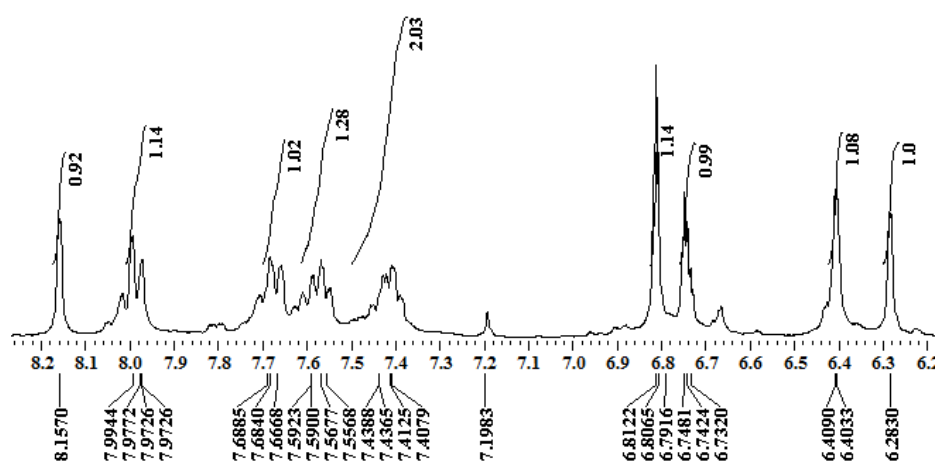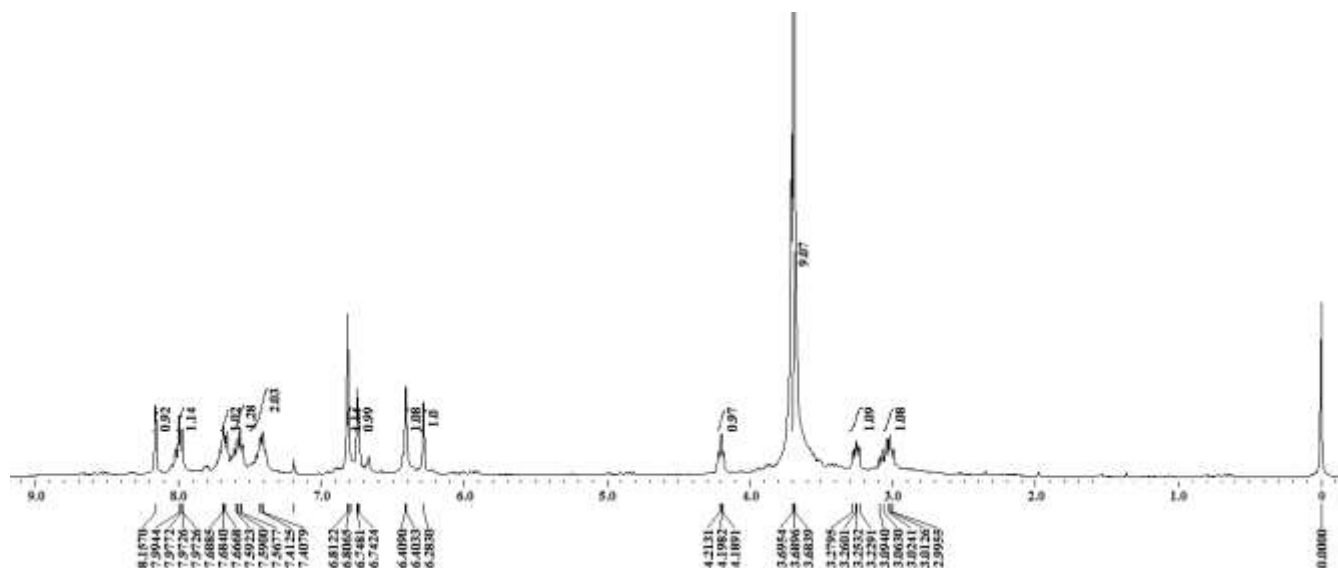

# <sup>13</sup>C NMR

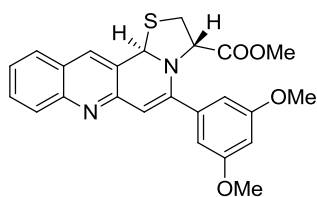

5g

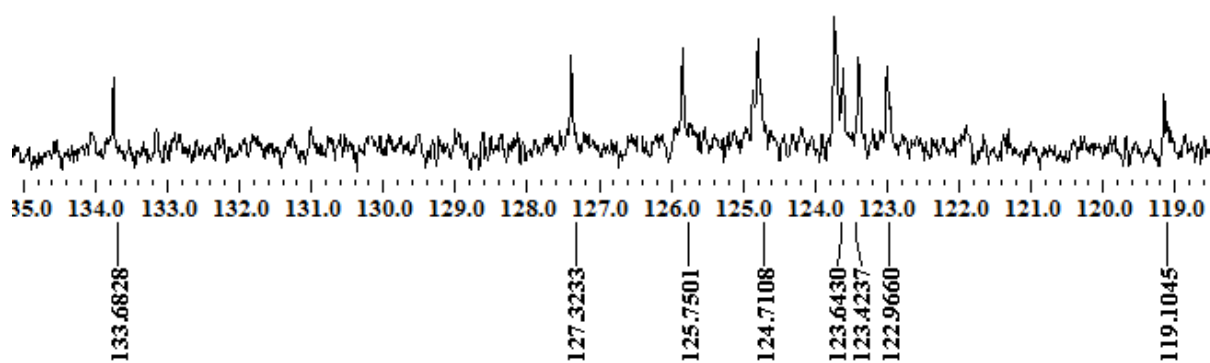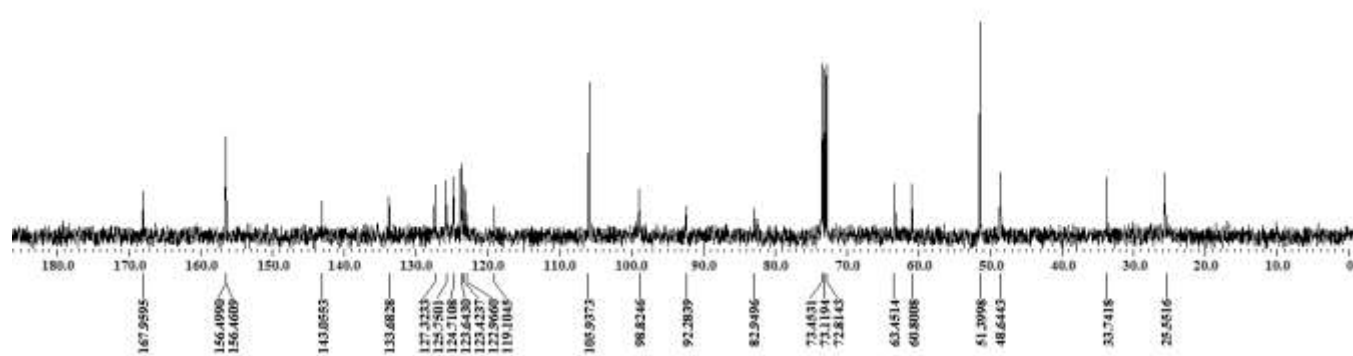

<sup>1</sup>H NMR

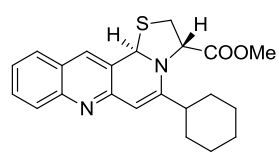

5h

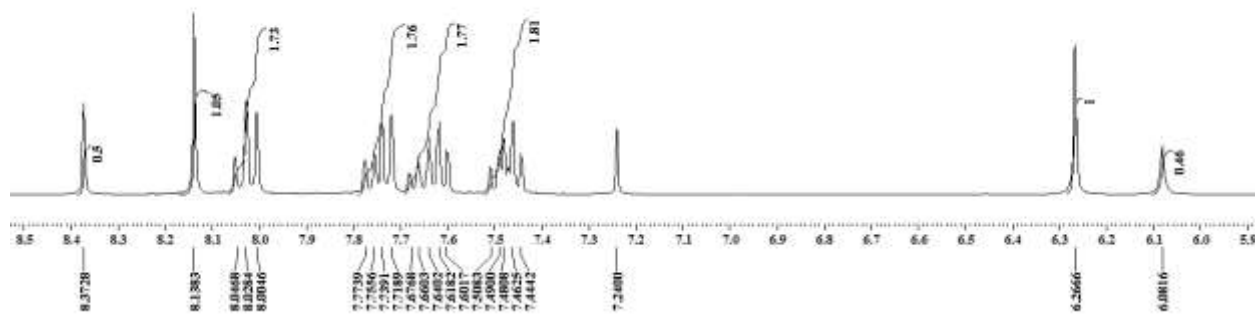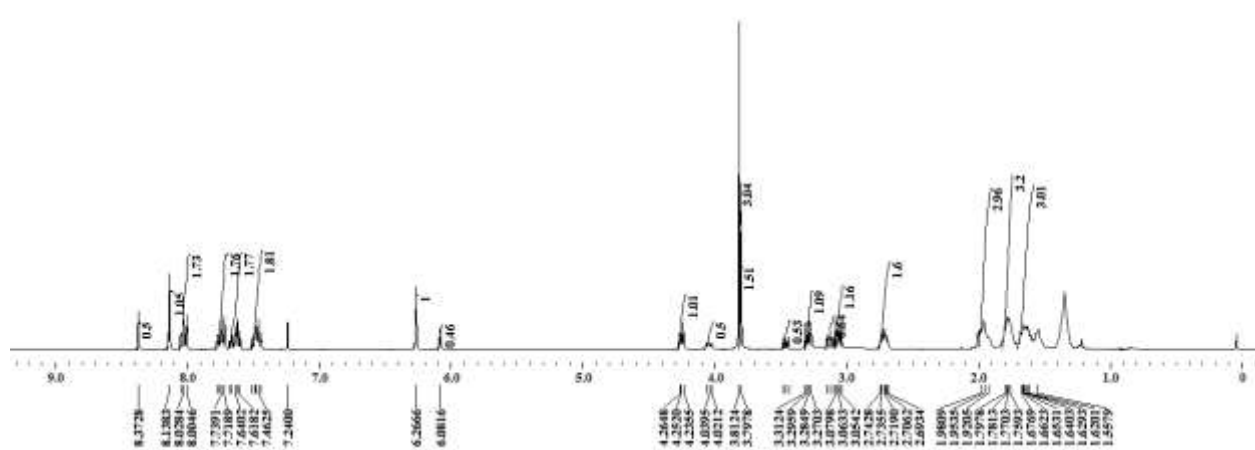



<sup>13</sup>C NMR

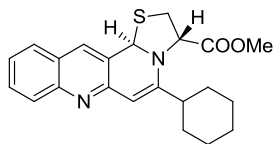

5h

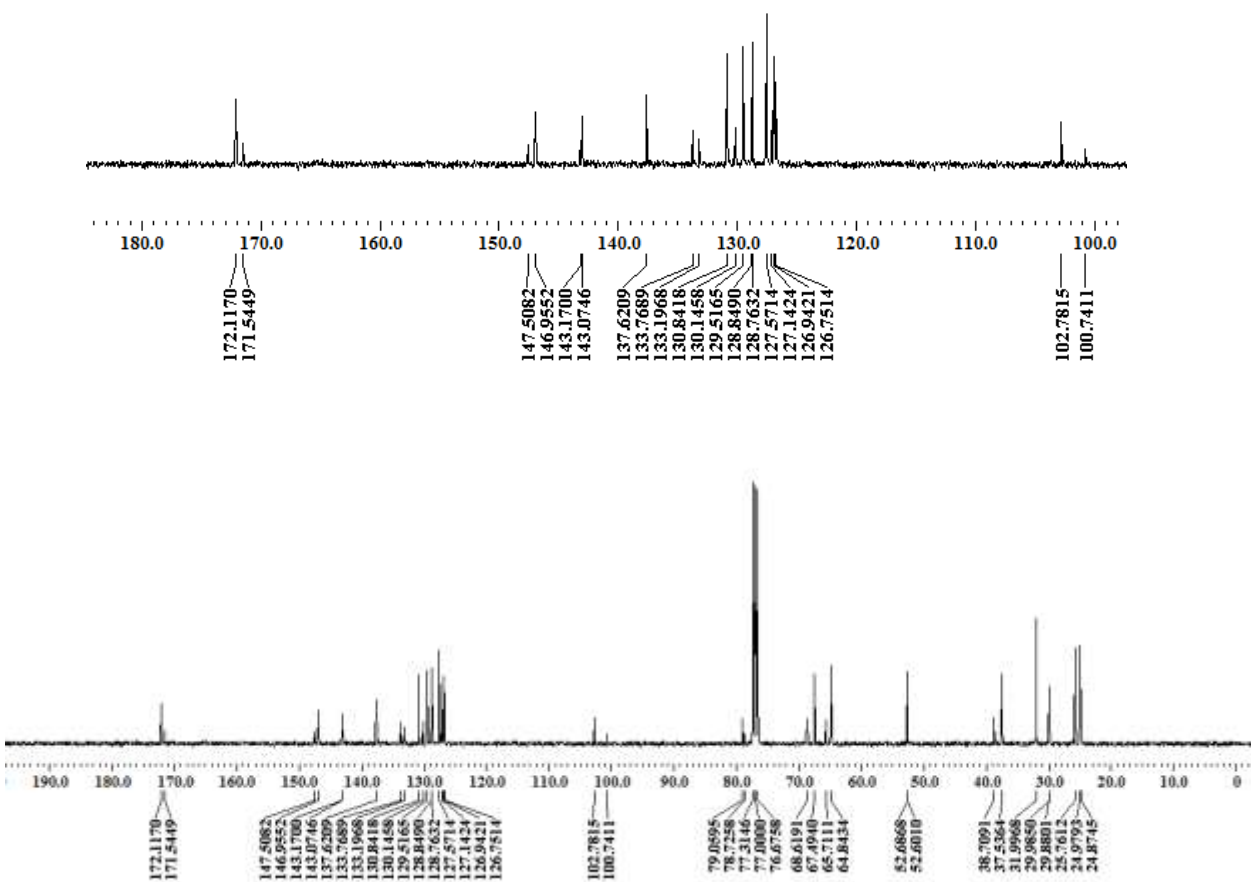

# <sup>1</sup>H NMR

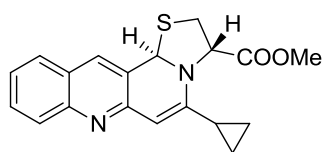

**5i**

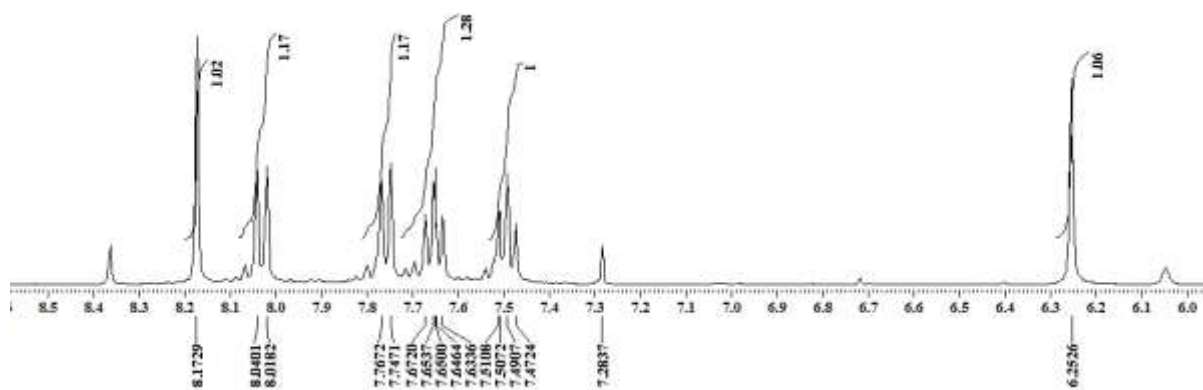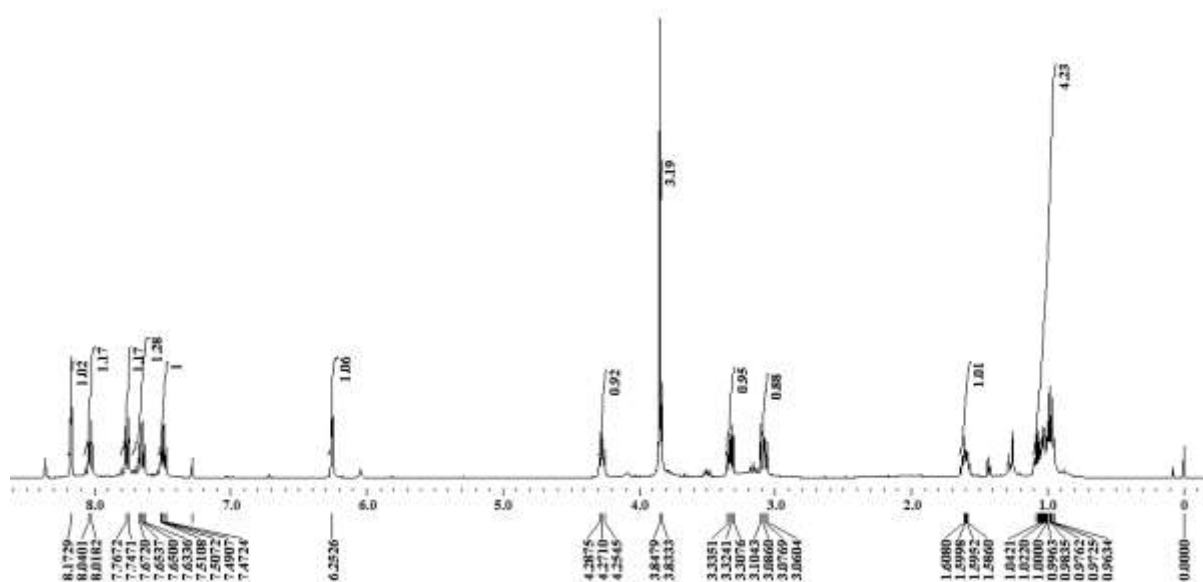

<sup>13</sup>C NMR

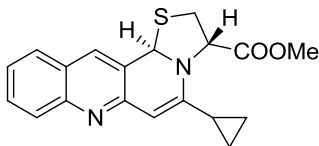

5i

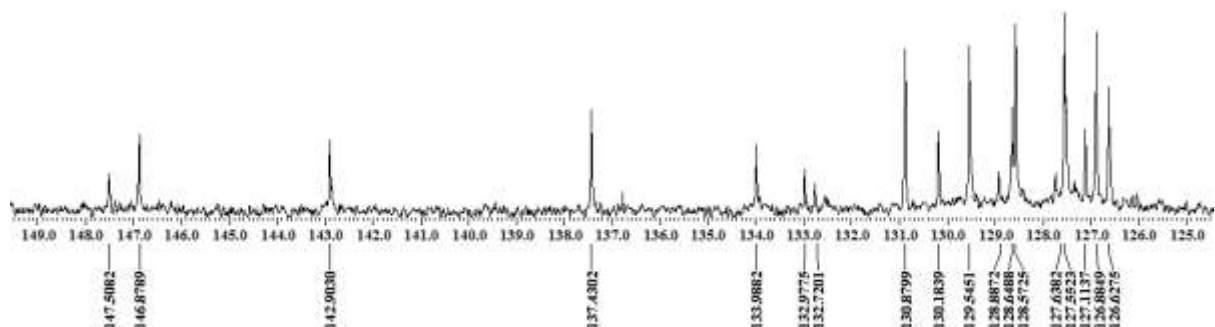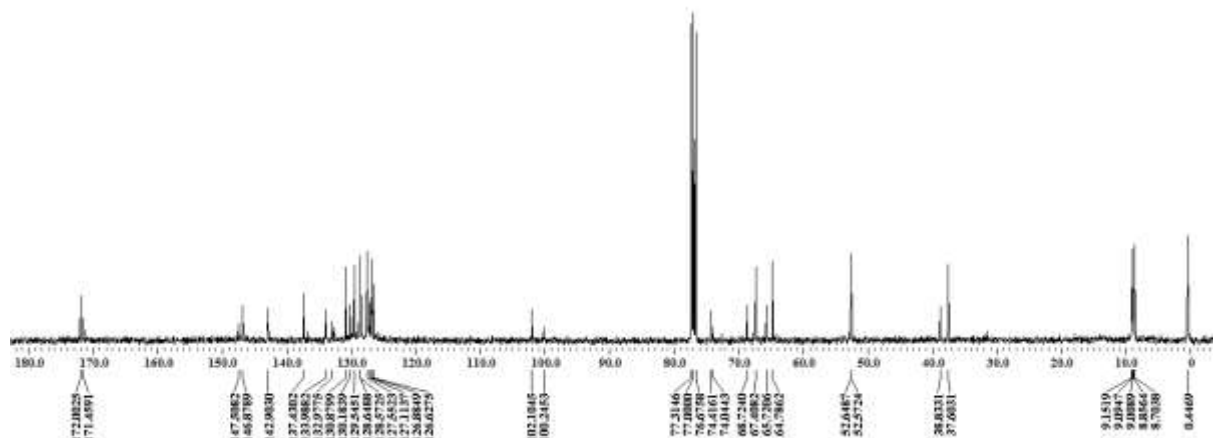

# <sup>1</sup>H NMR

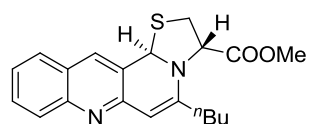

5j

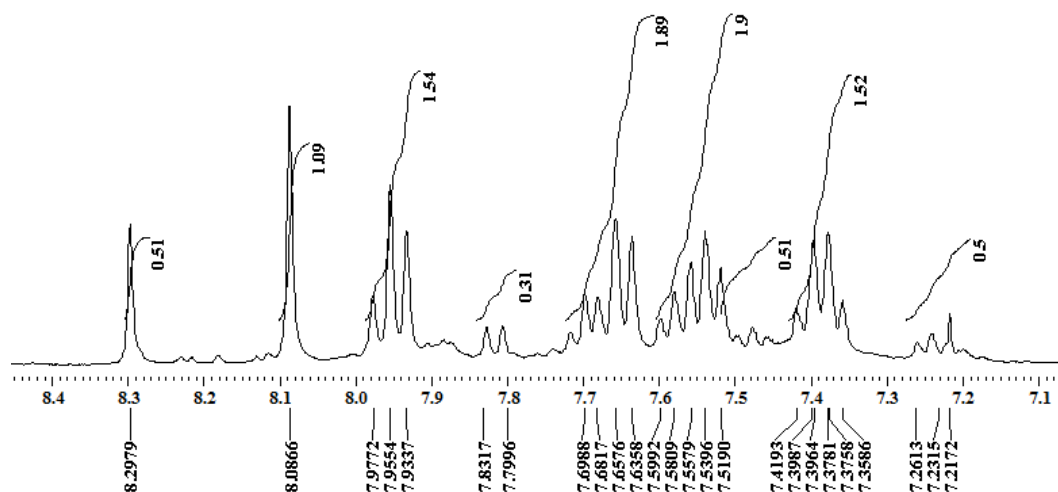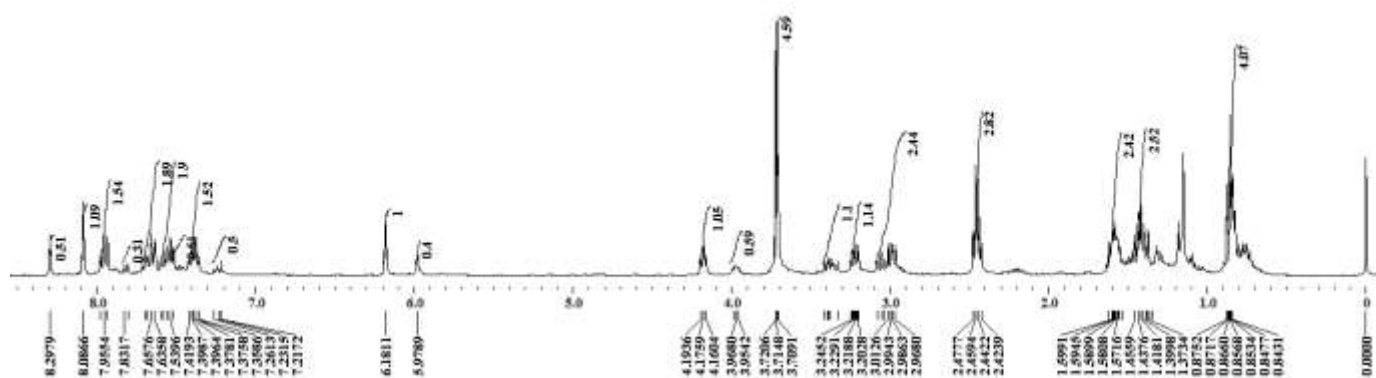

<sup>13</sup>C NMR

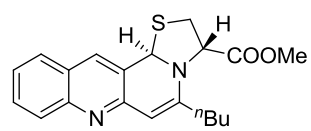

5j

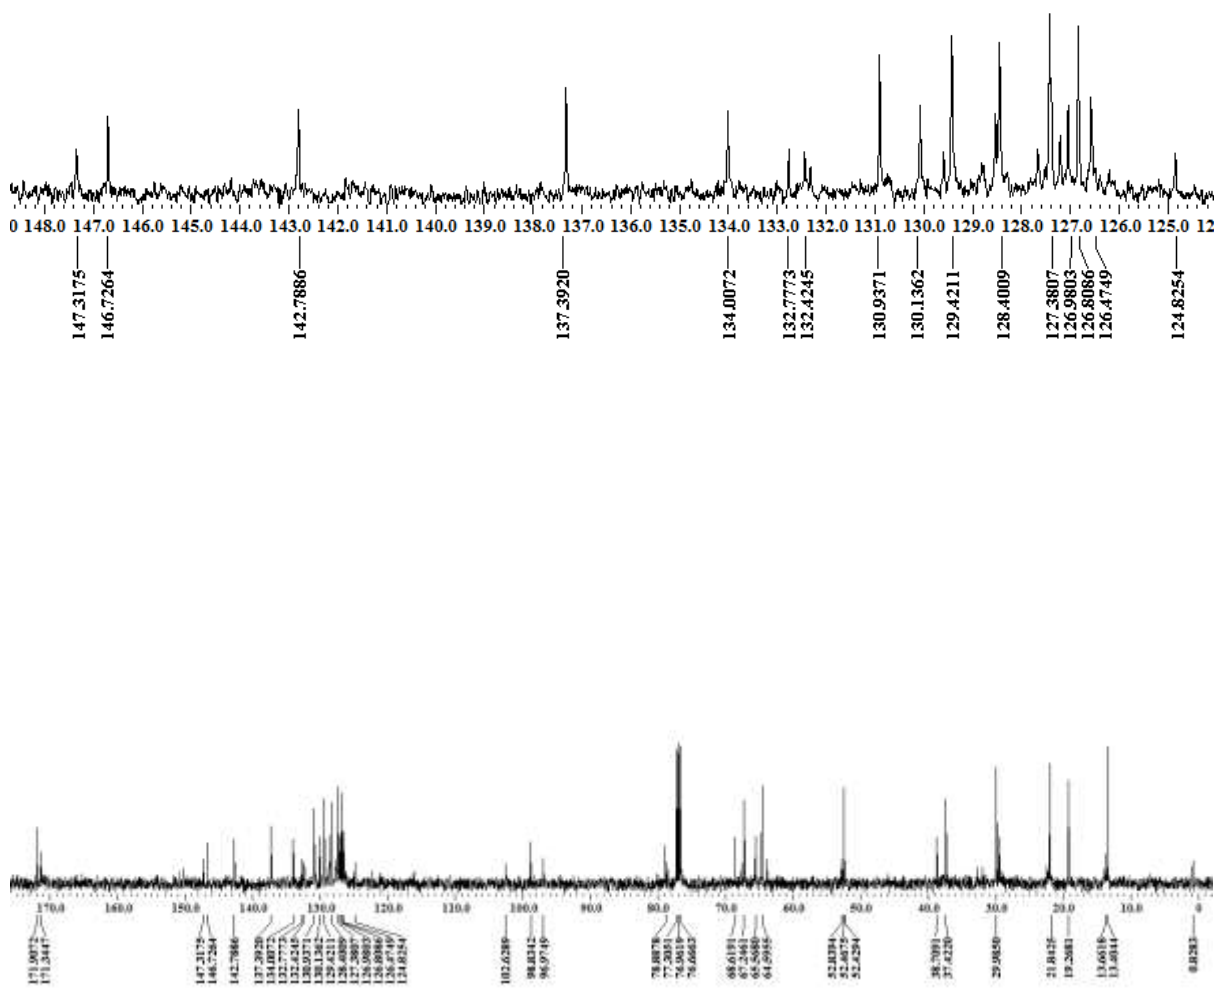

<sup>1</sup>H NMR

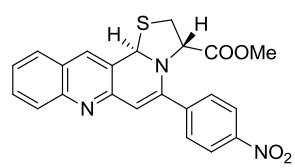

5k

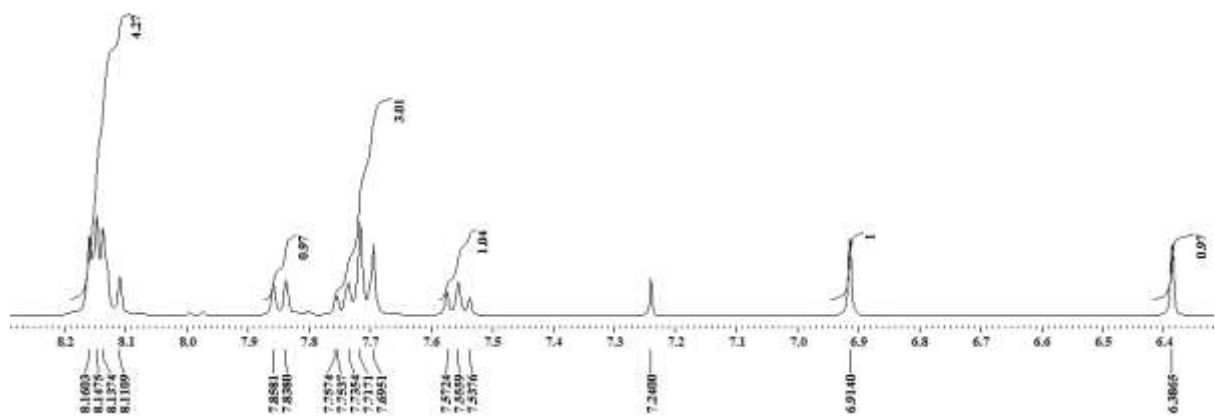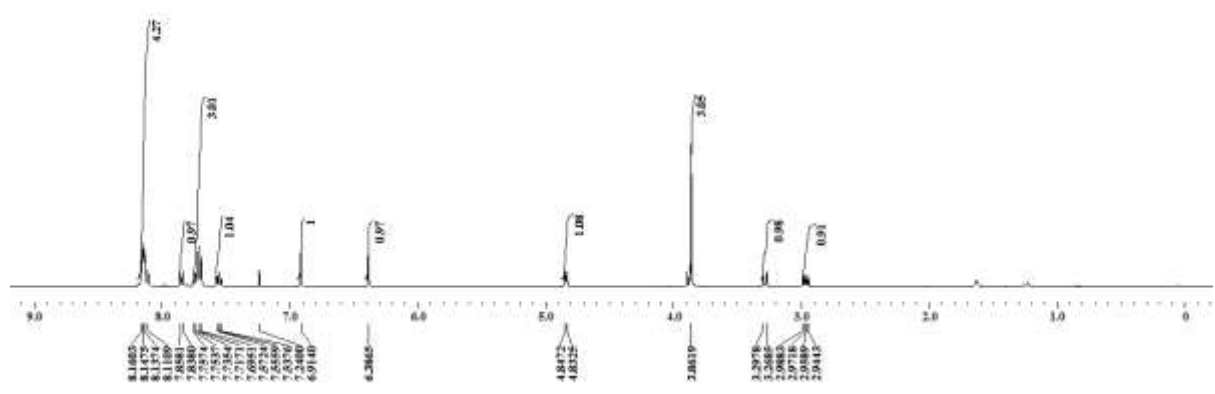

<sup>13</sup>C NMR

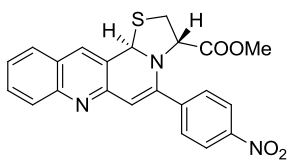

5k

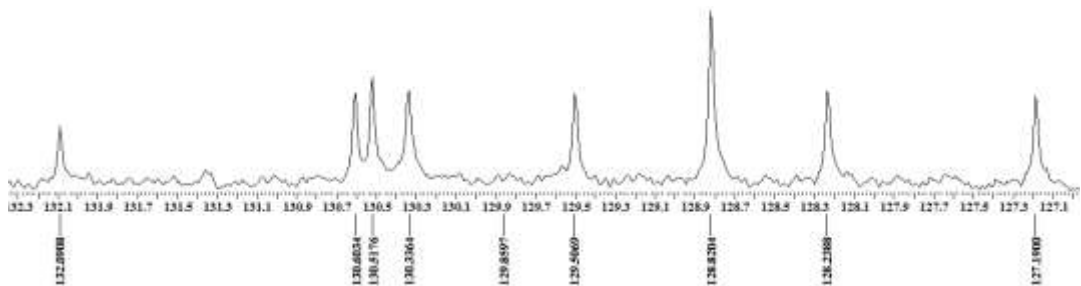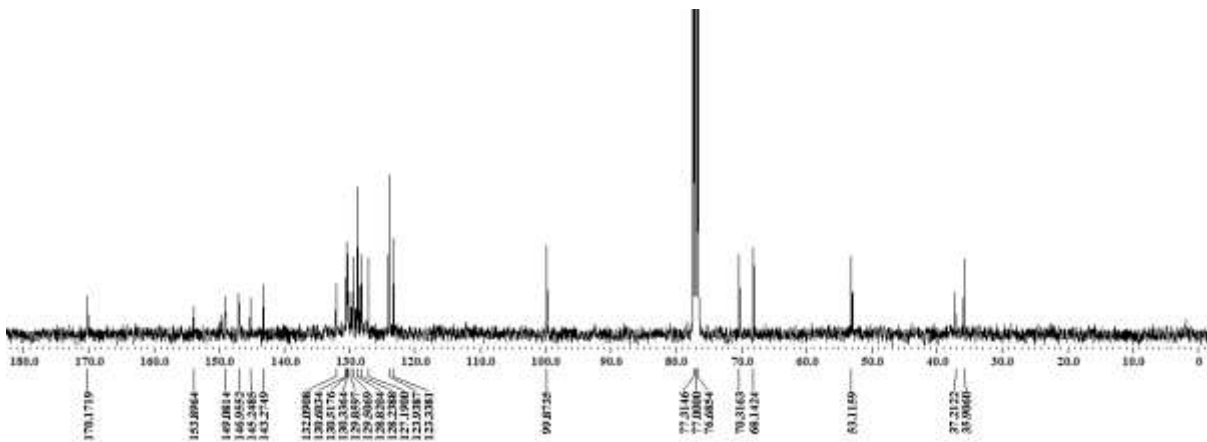

<sup>1</sup>H NMR

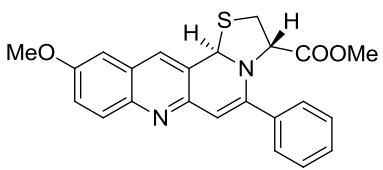

5l

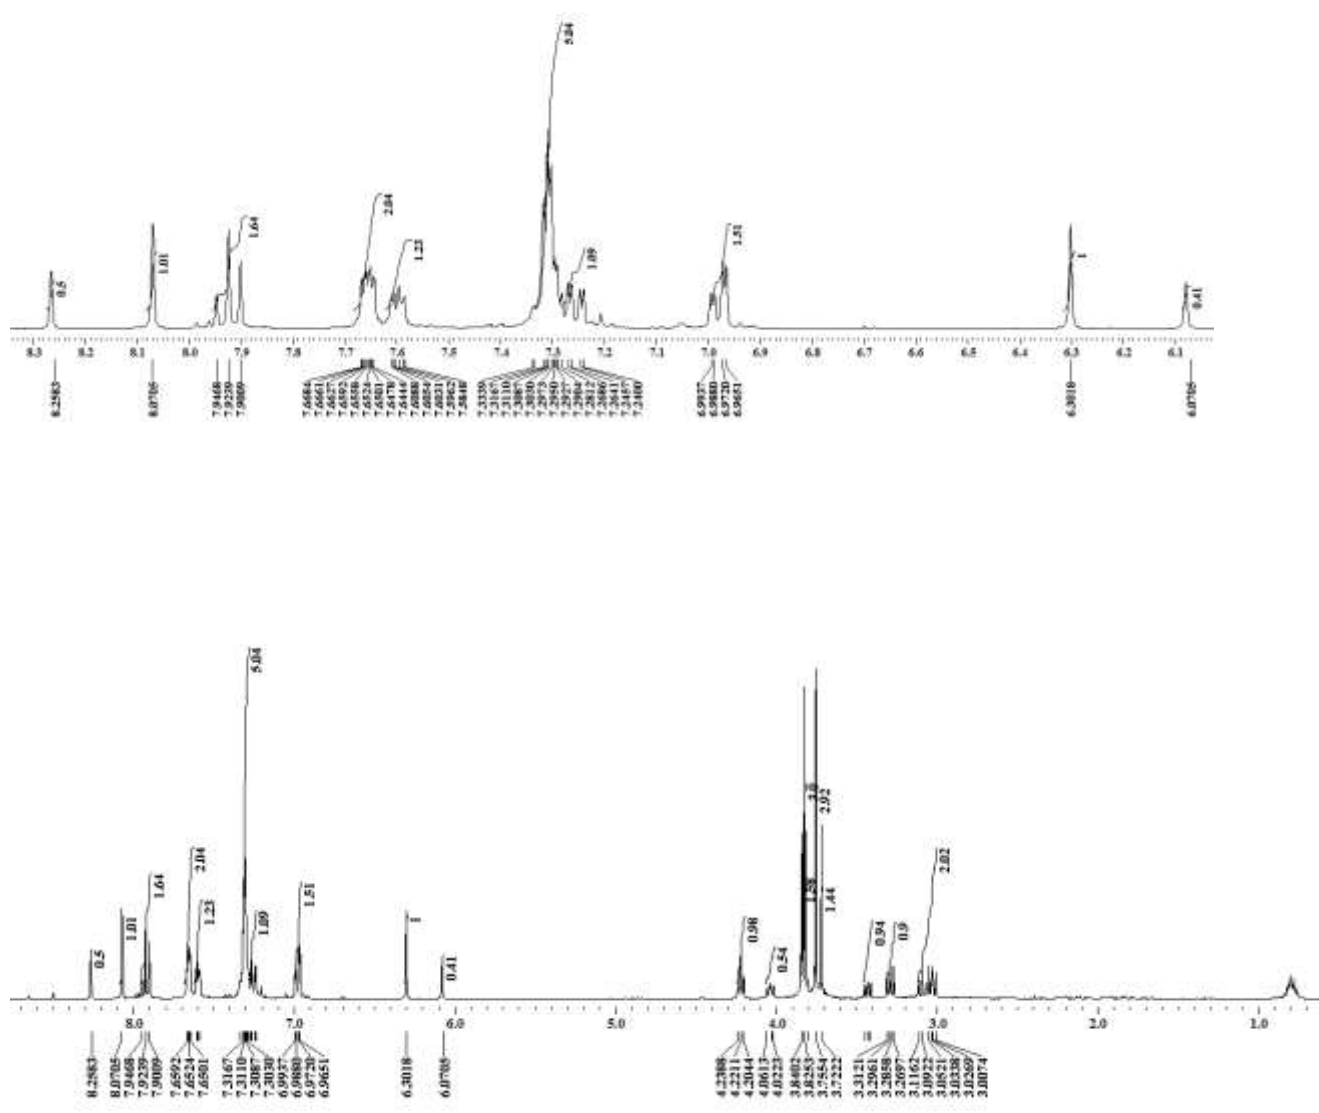



<sup>13</sup>C NMR

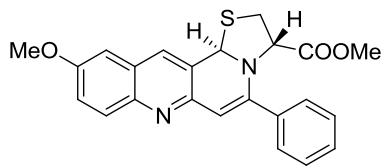

51

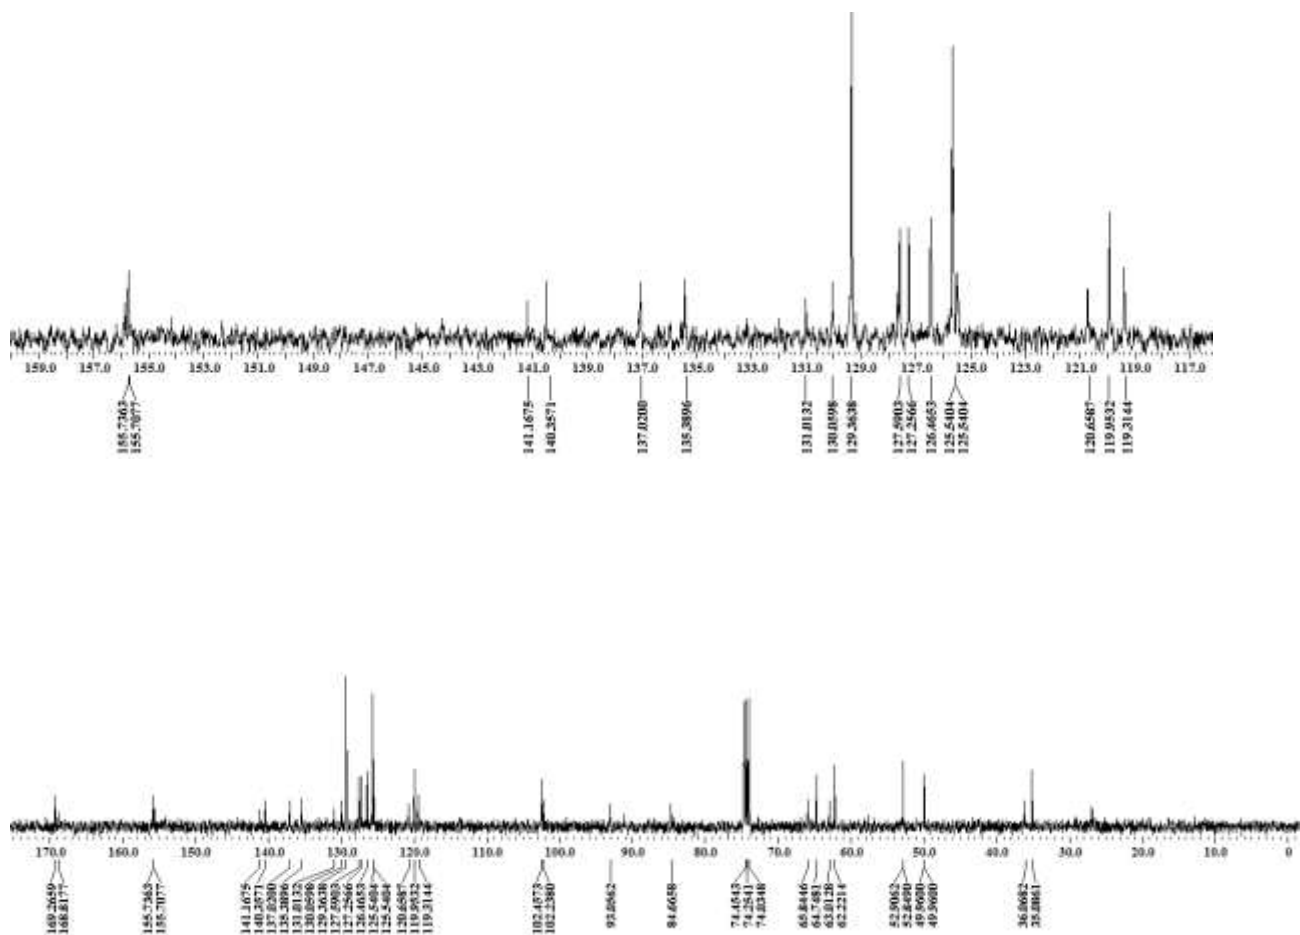

<sup>1</sup>H NMR

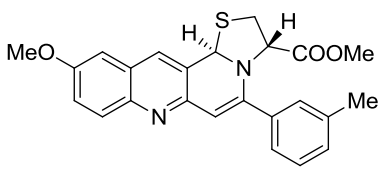

5m

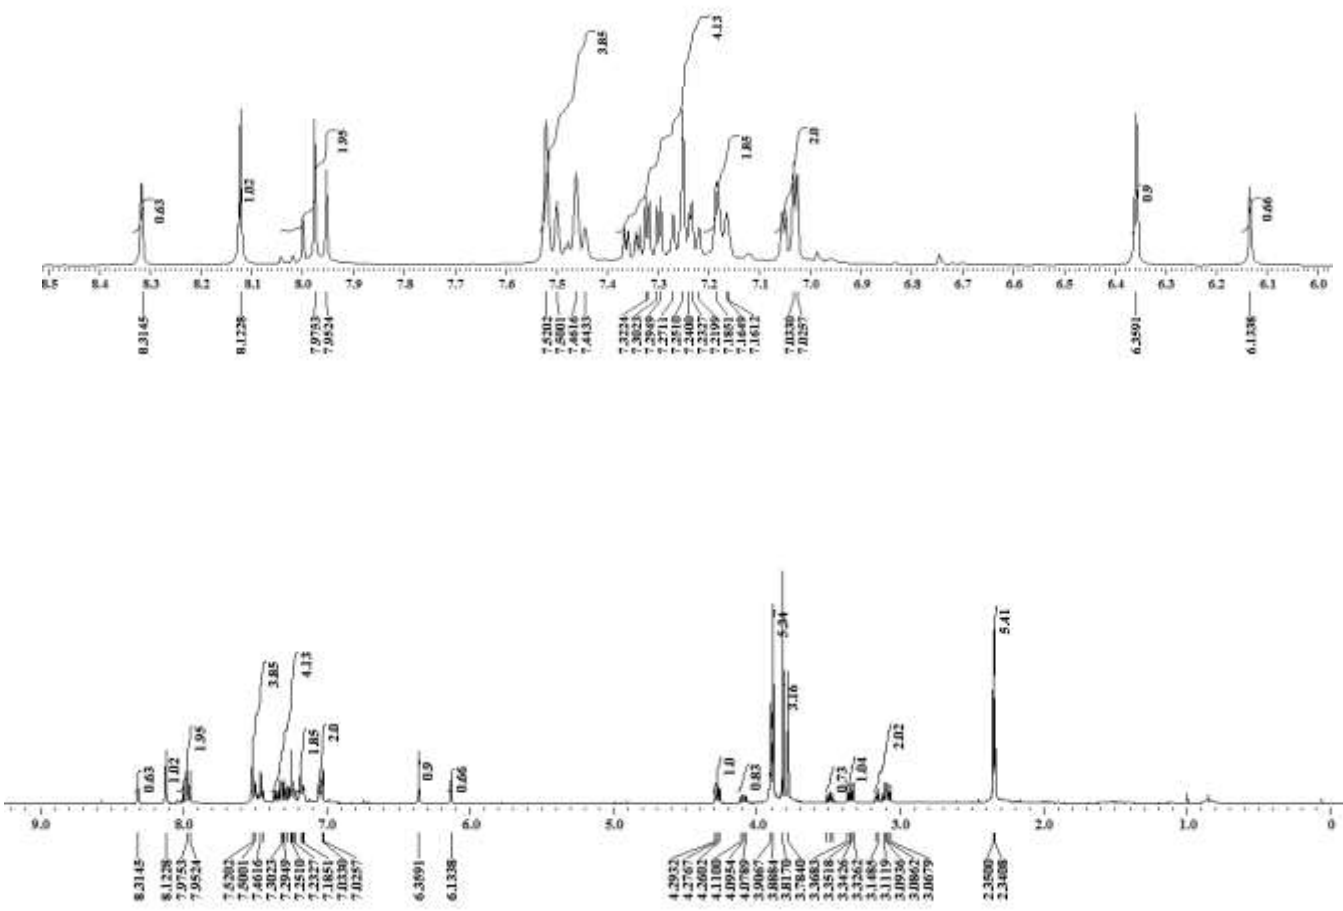

<sup>13</sup>C NMR

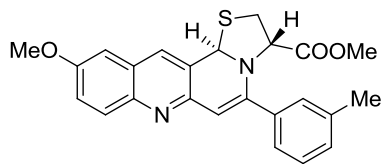

5m

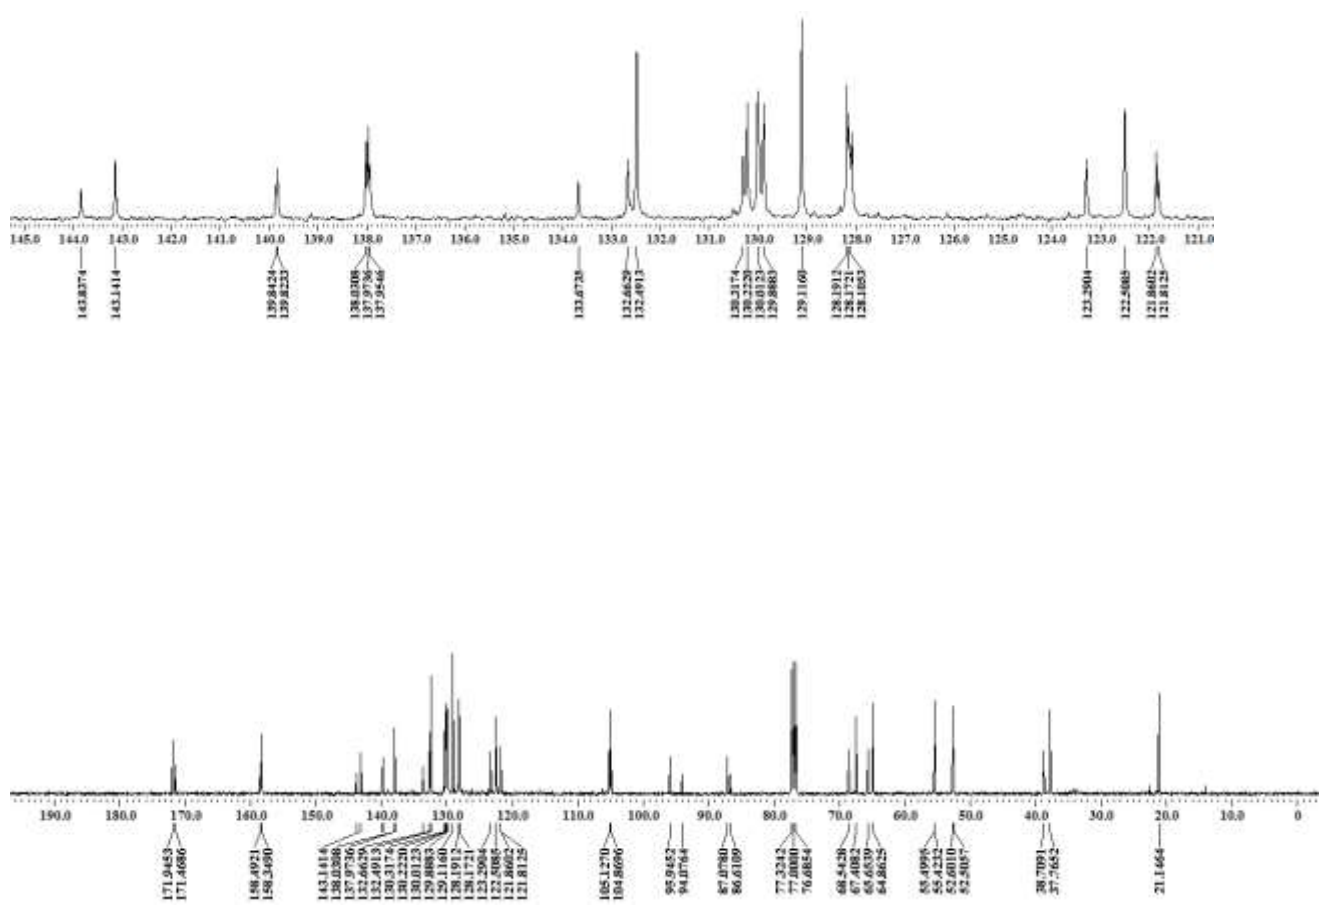

# <sup>1</sup>H NMR

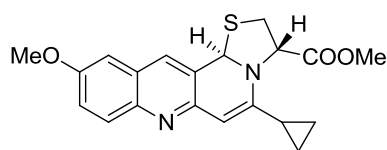

**5n**

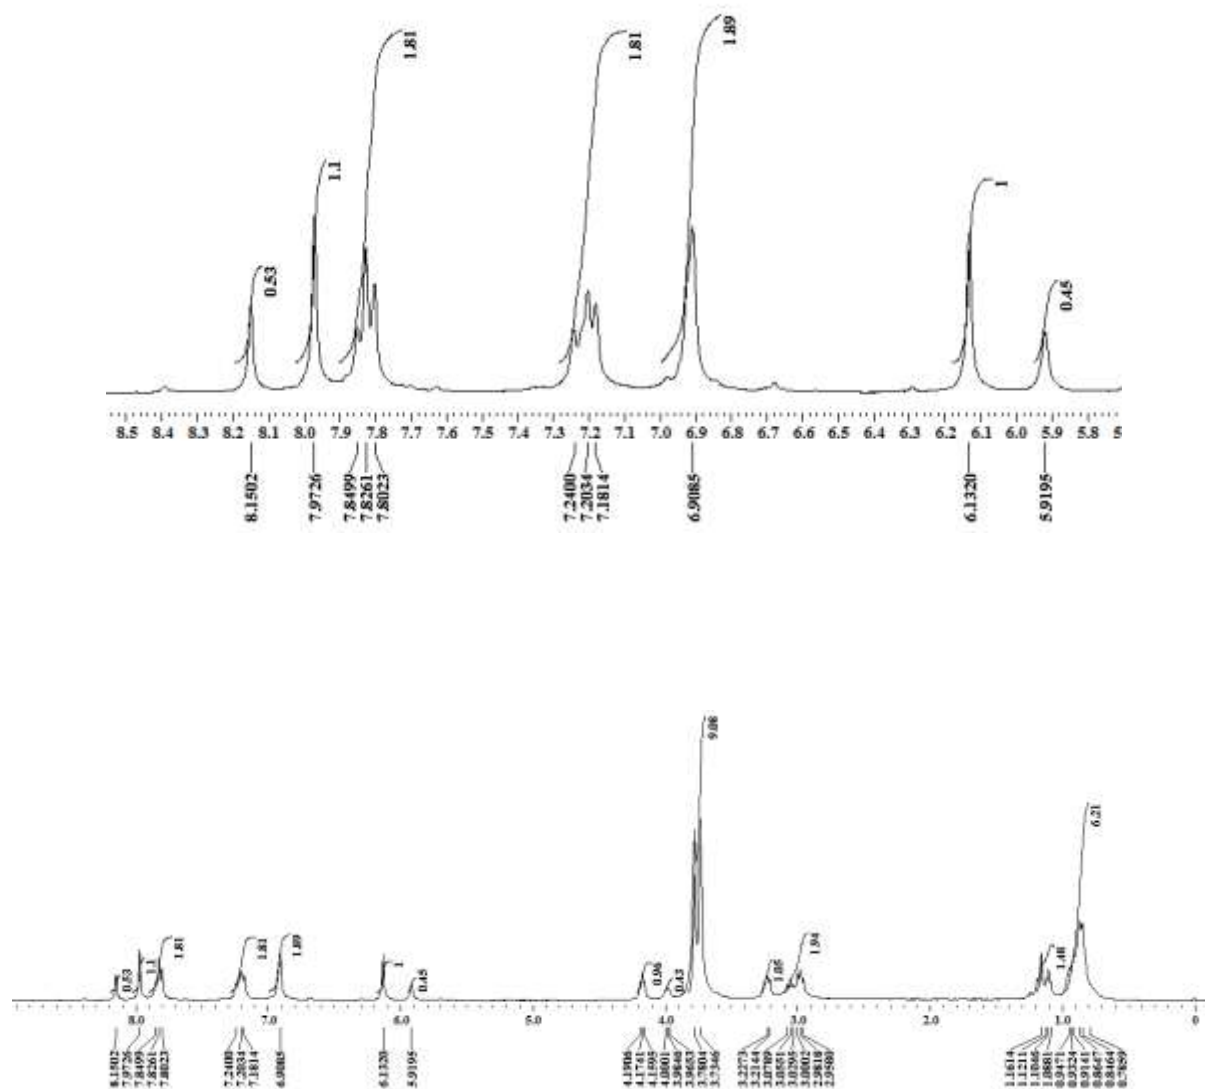

<sup>13</sup>C NMR

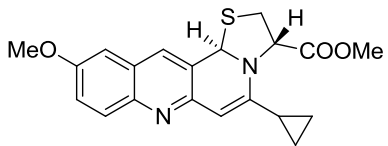

5n

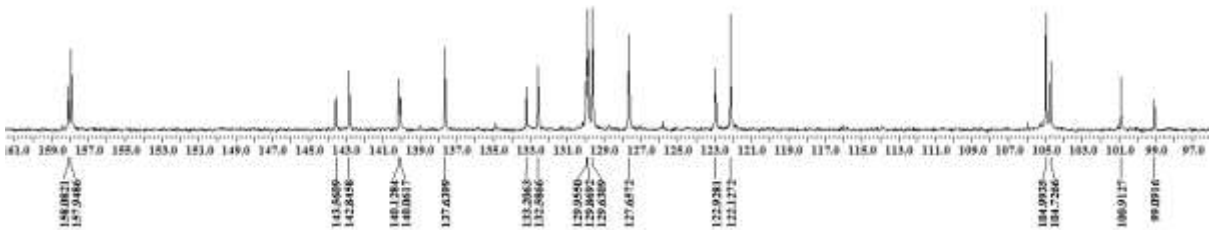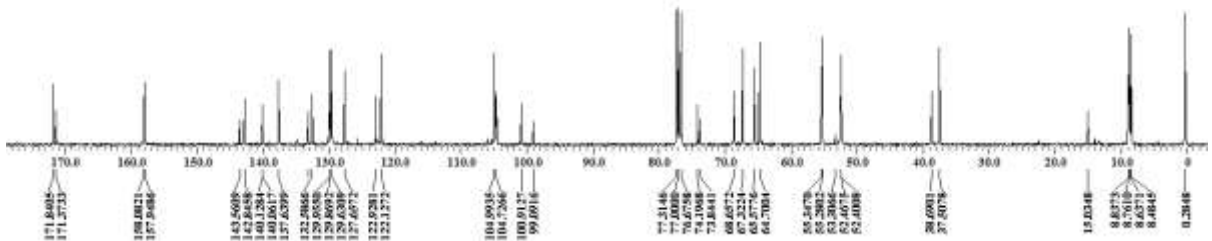

<sup>1</sup>H NMR

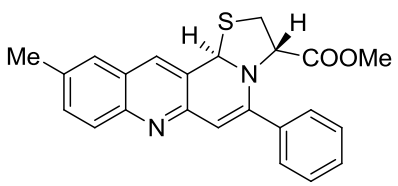

5o

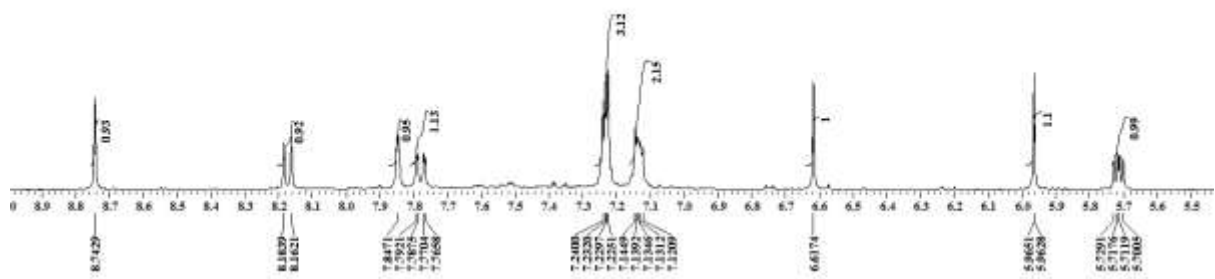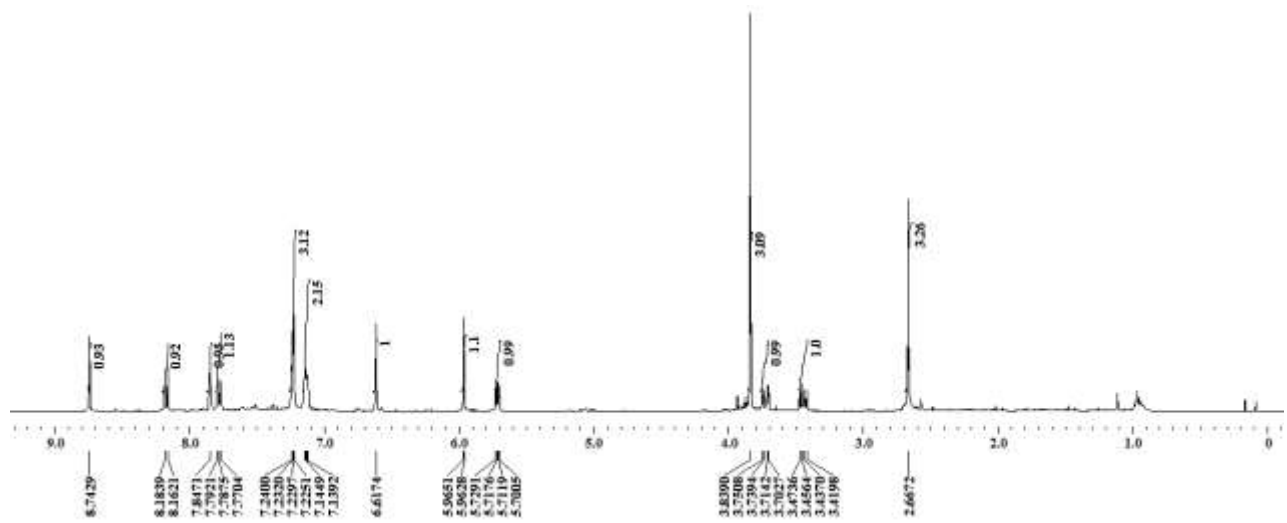

<sup>13</sup>C NMR

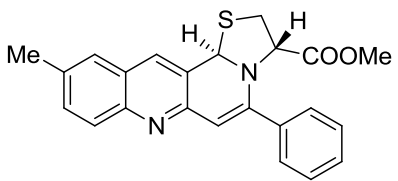

5o

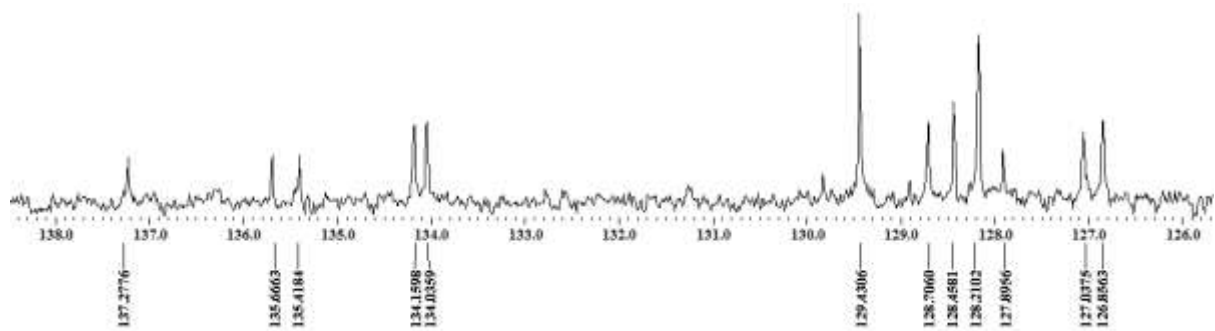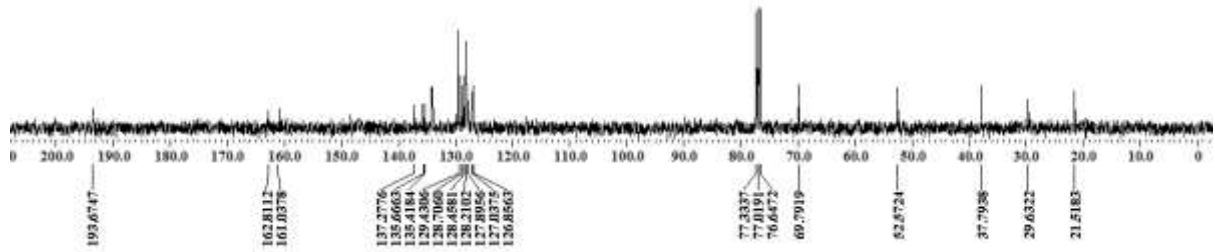

# <sup>1</sup>H NMR

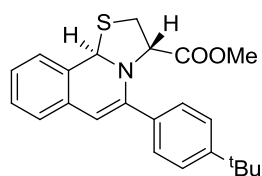

6

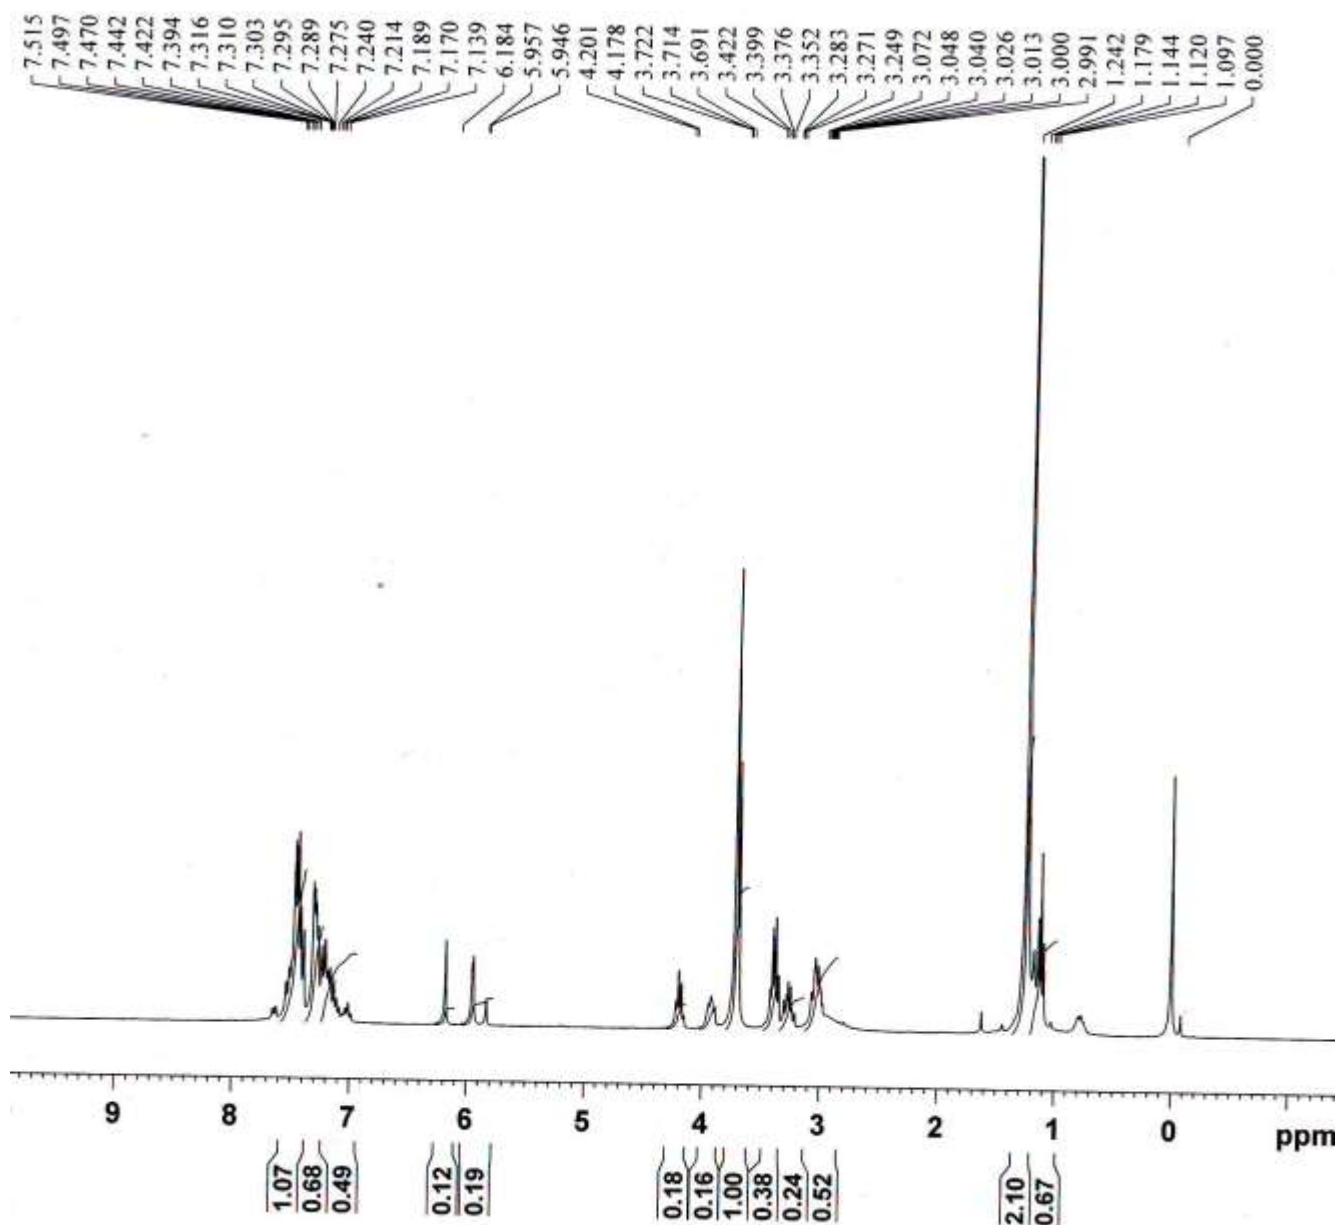



<sup>13</sup>C NMR

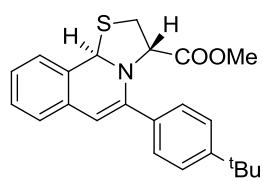

6

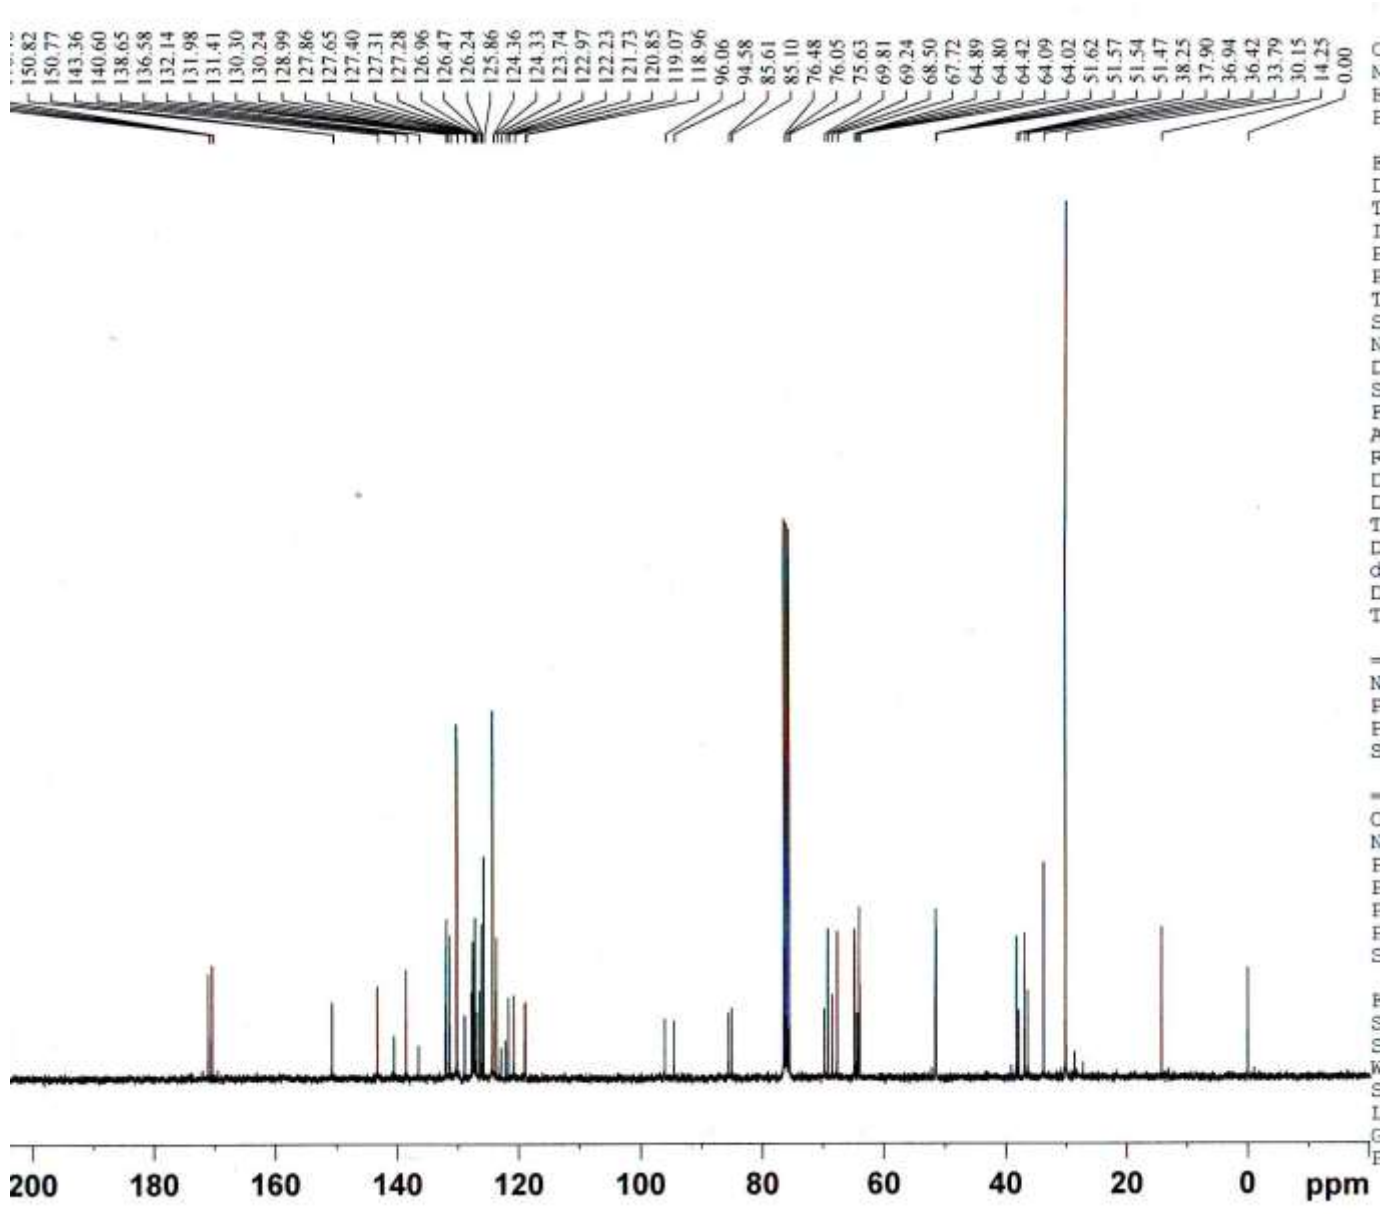

# <sup>1</sup>H NMR

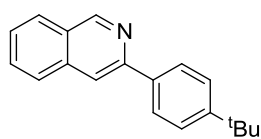

7

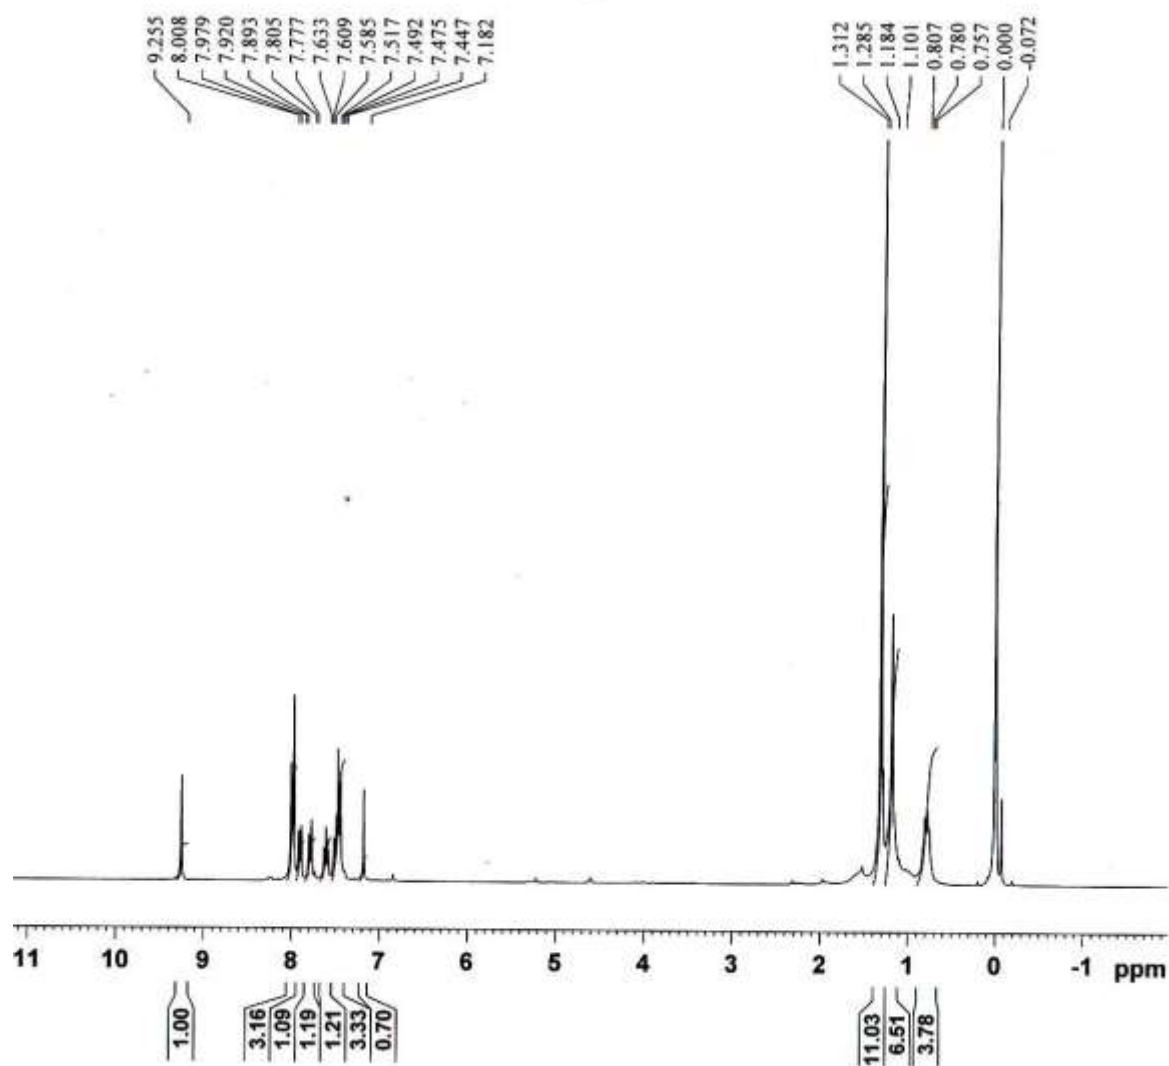

# <sup>13</sup>C NMR

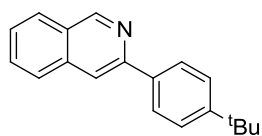

7

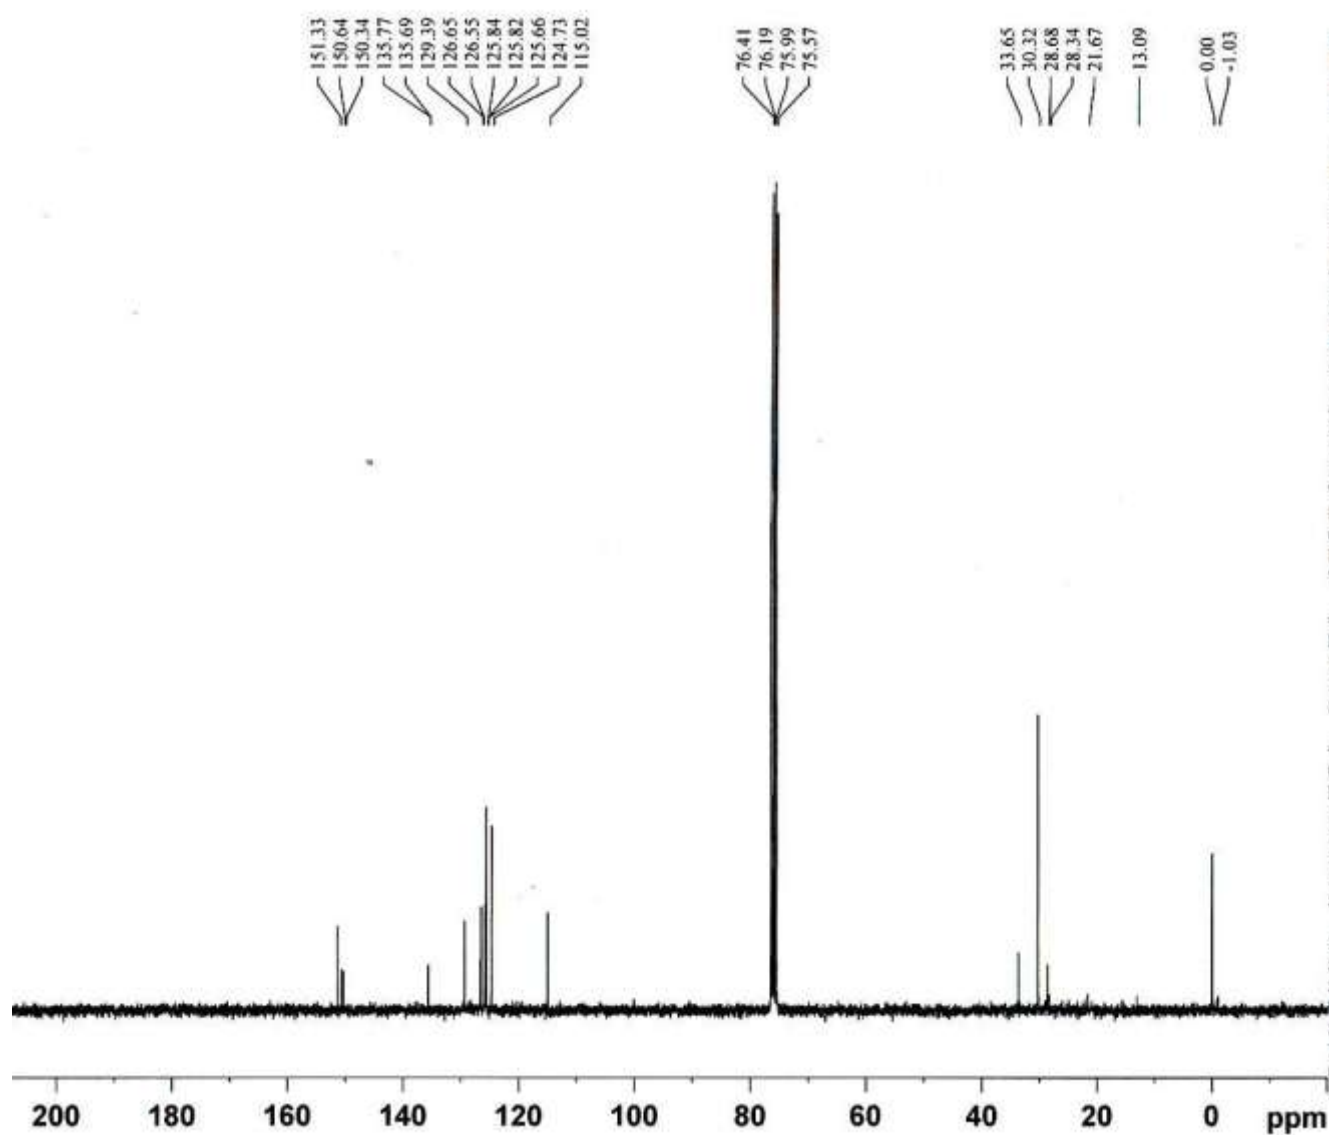

<sup>1</sup>H NMR

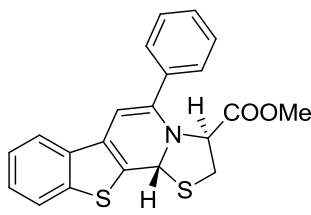

8a

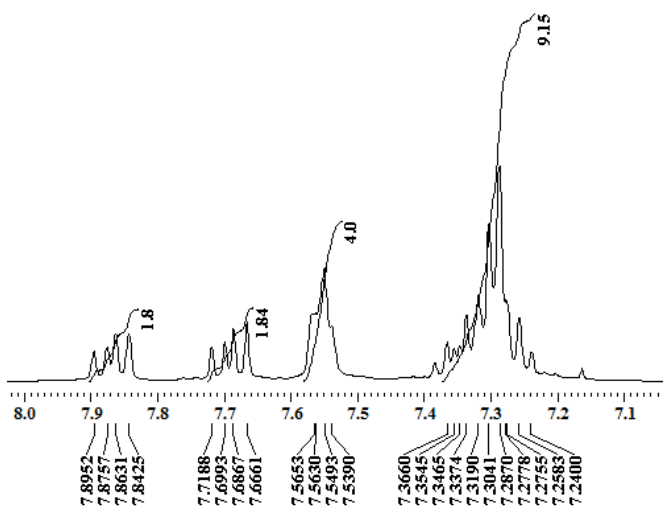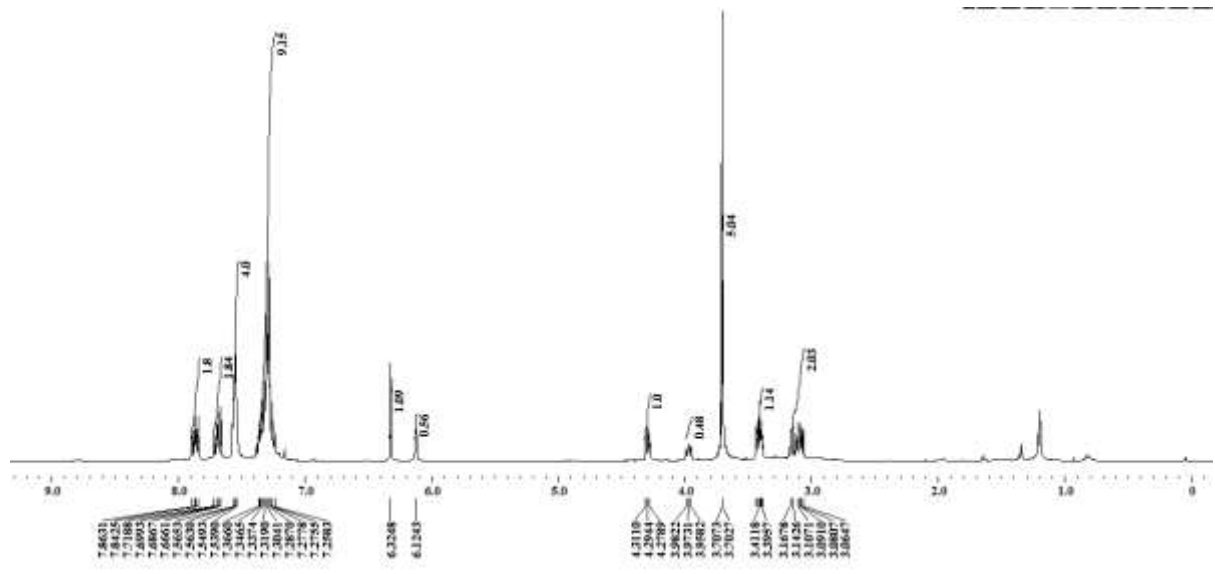

<sup>13</sup>C NMR

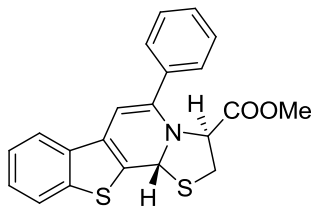

8a

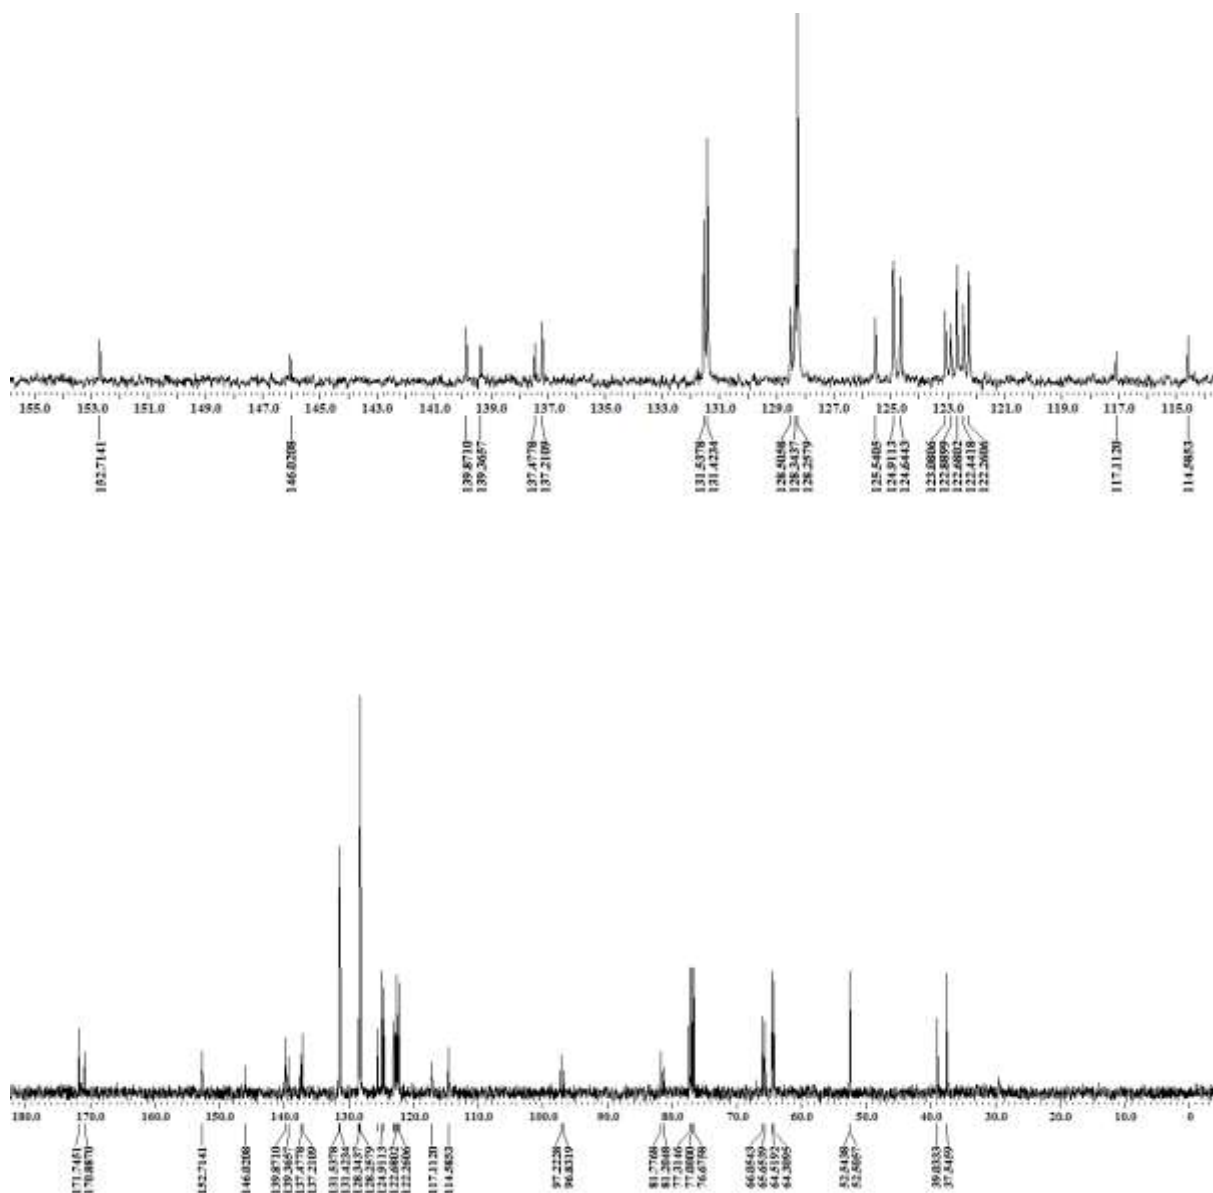

# <sup>1</sup>H NMR

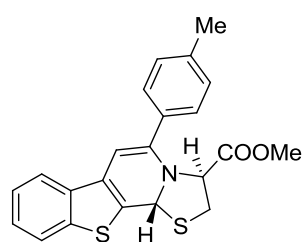

**8b**

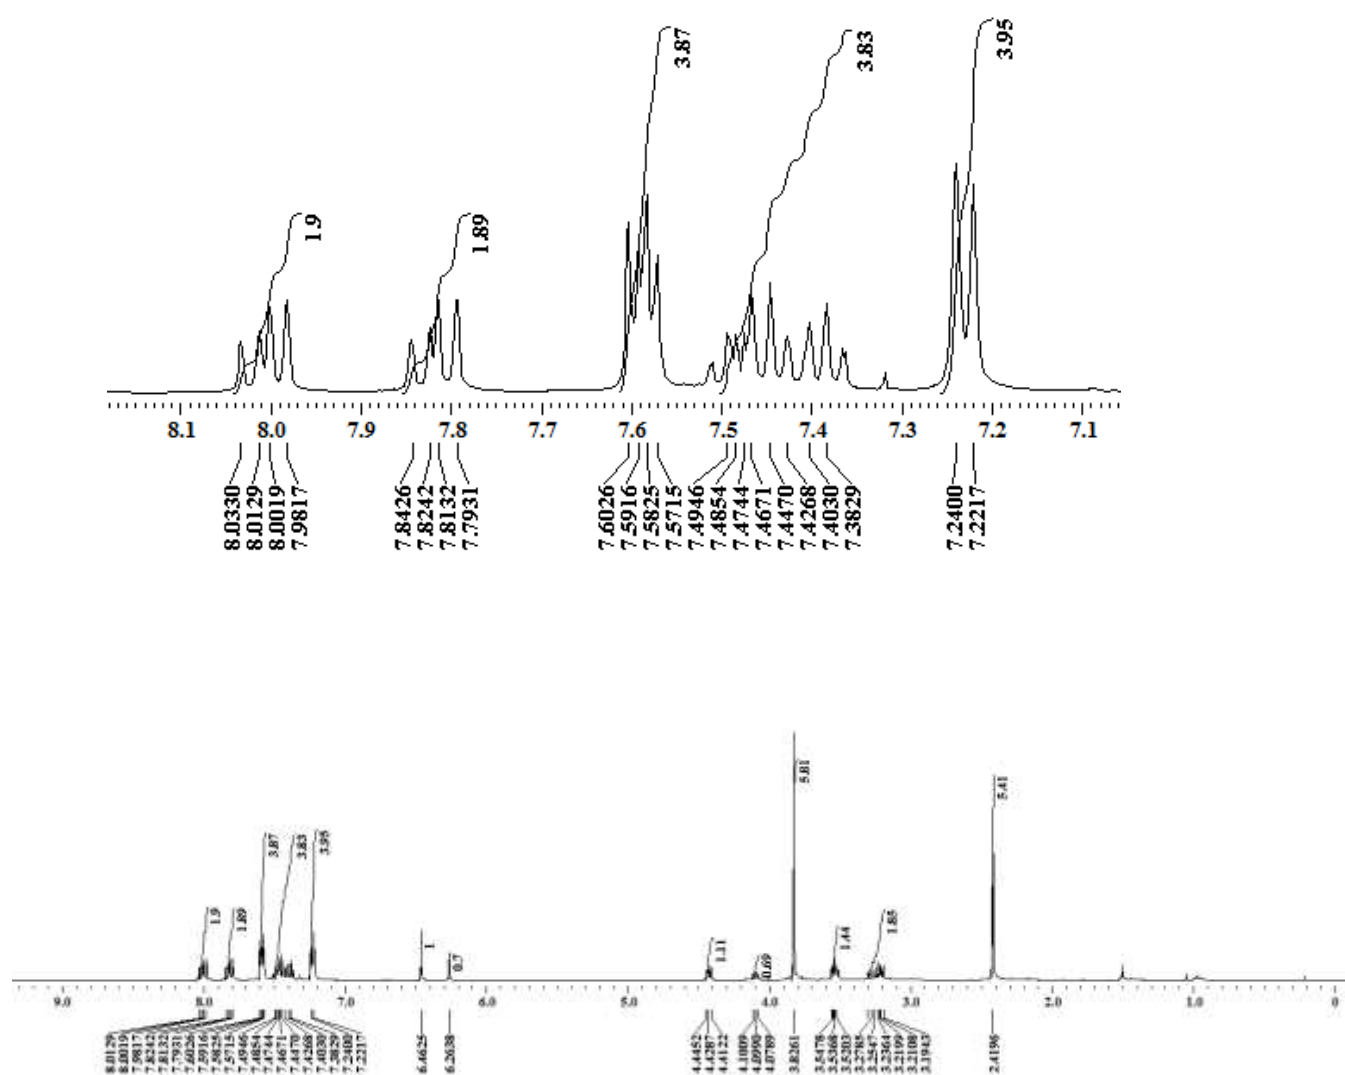

<sup>13</sup>C NMR

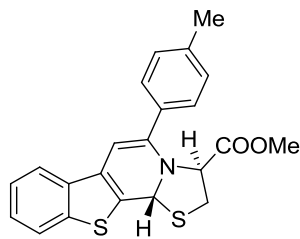

8b

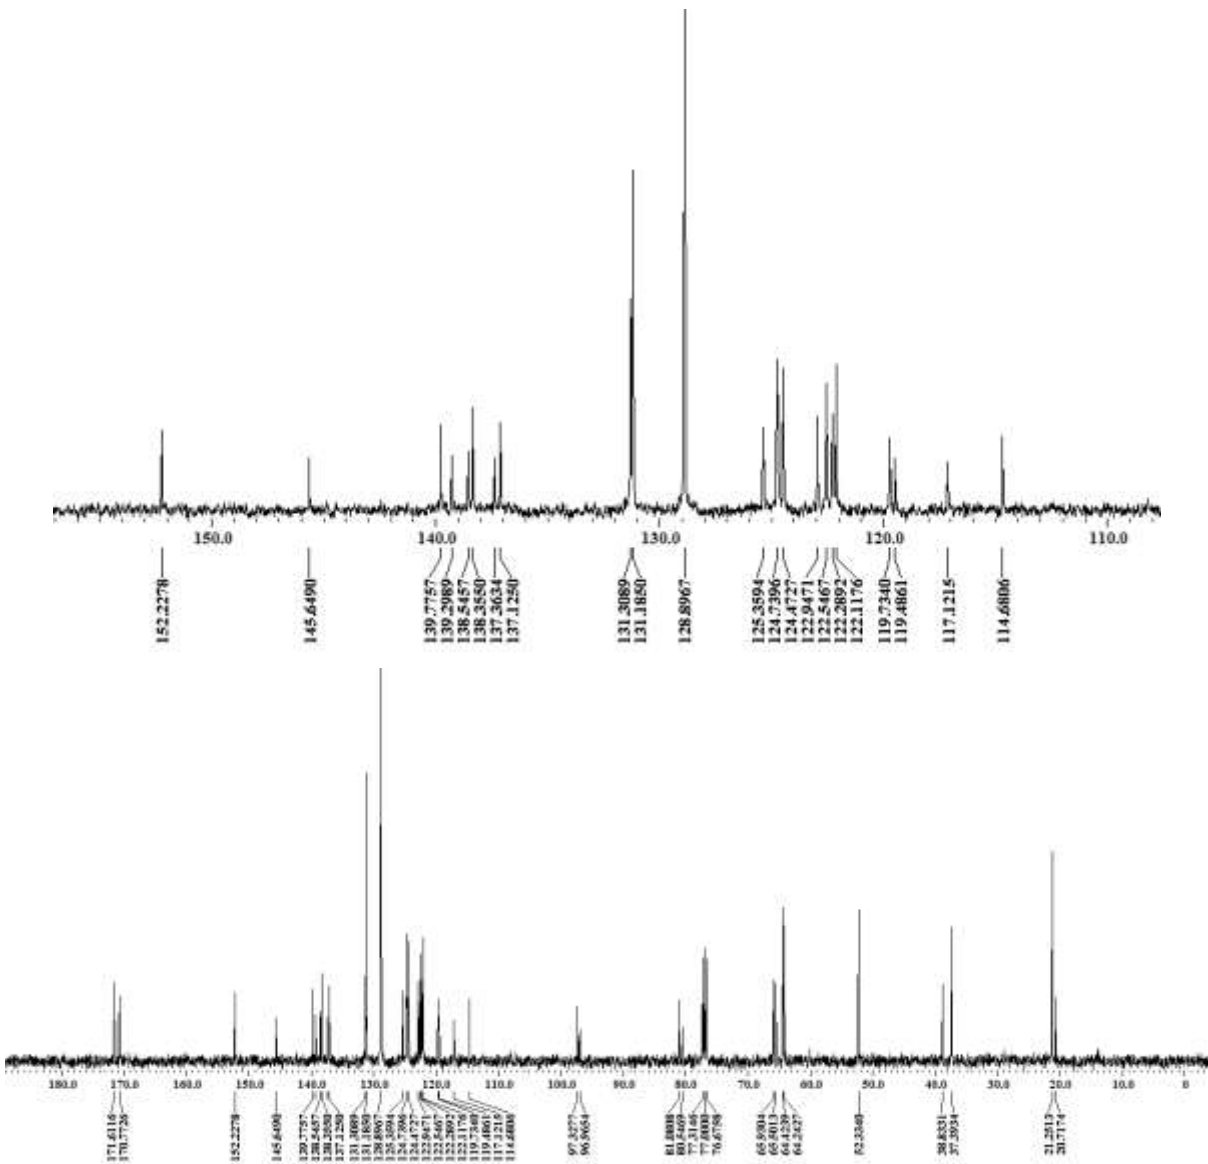

# <sup>1</sup>H NMR

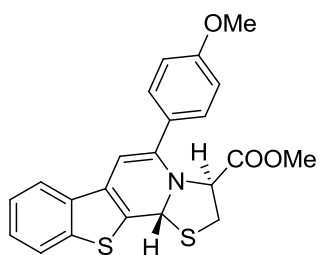

**8c**

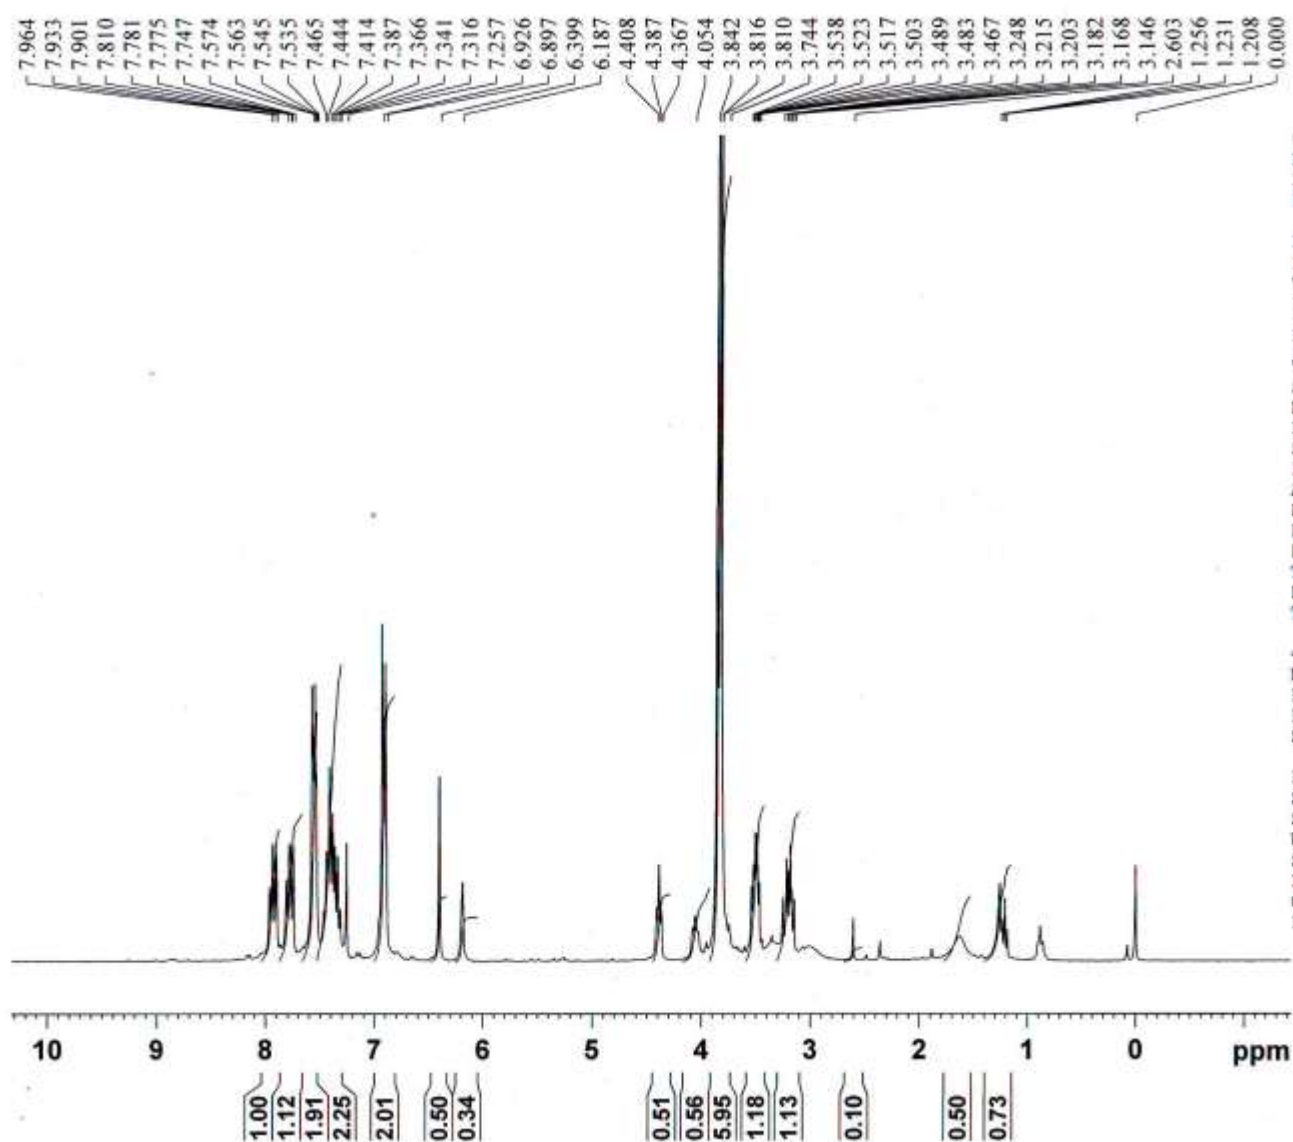



# <sup>13</sup>C NMR

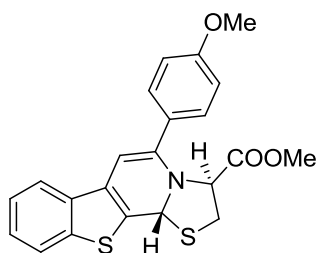

8c

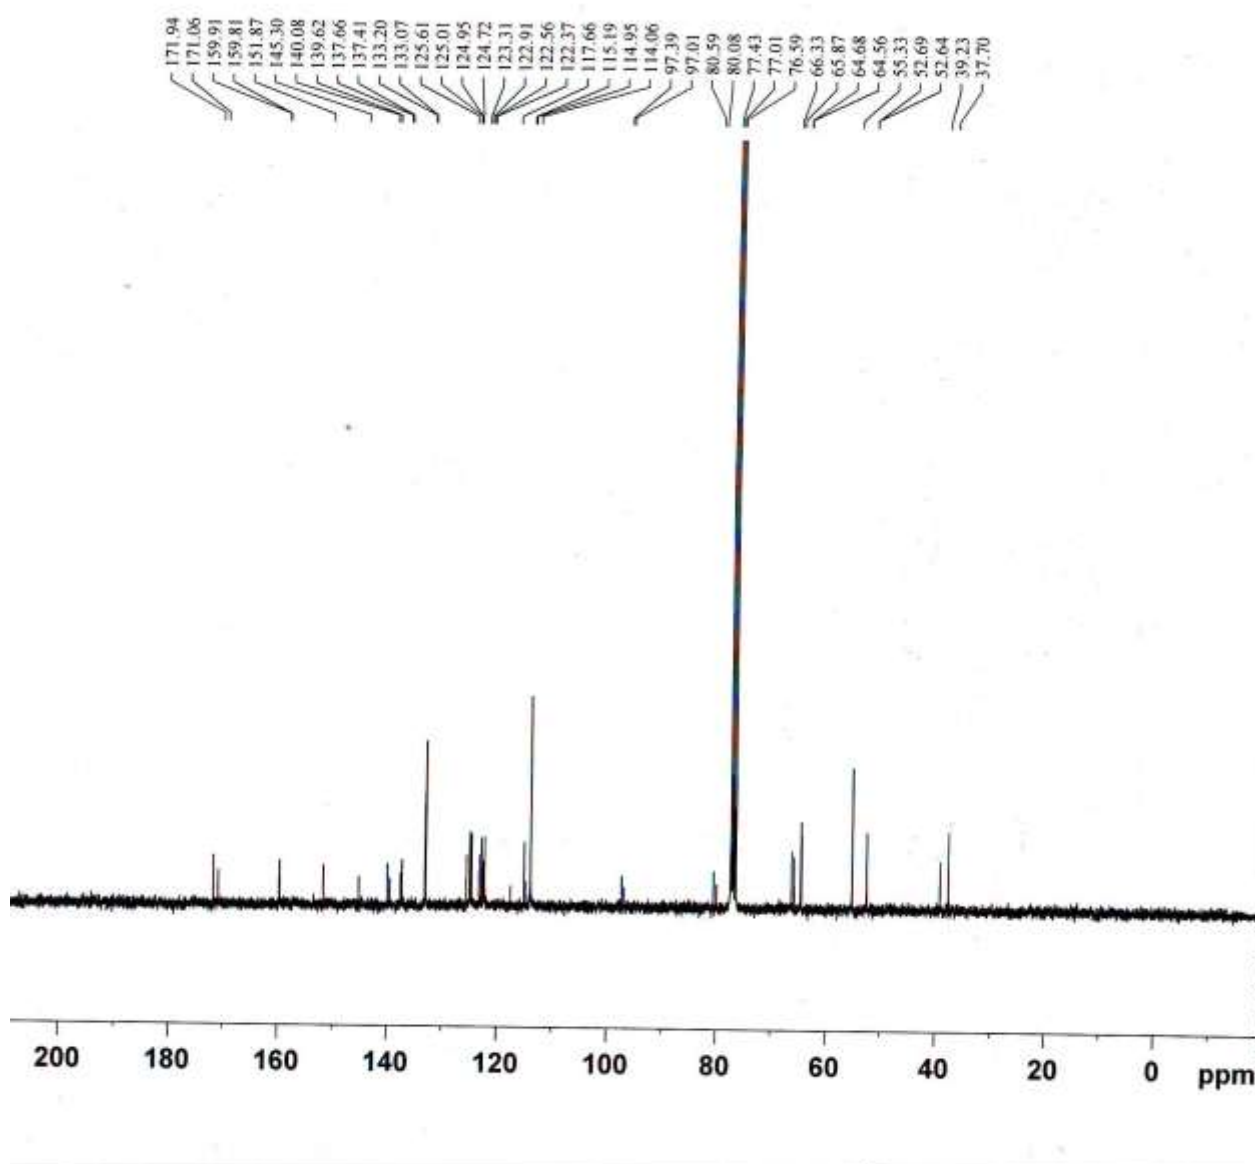

# <sup>1</sup>H NMR

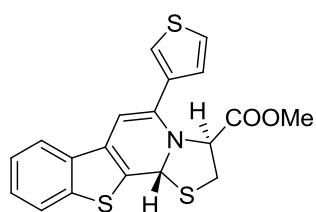

8d

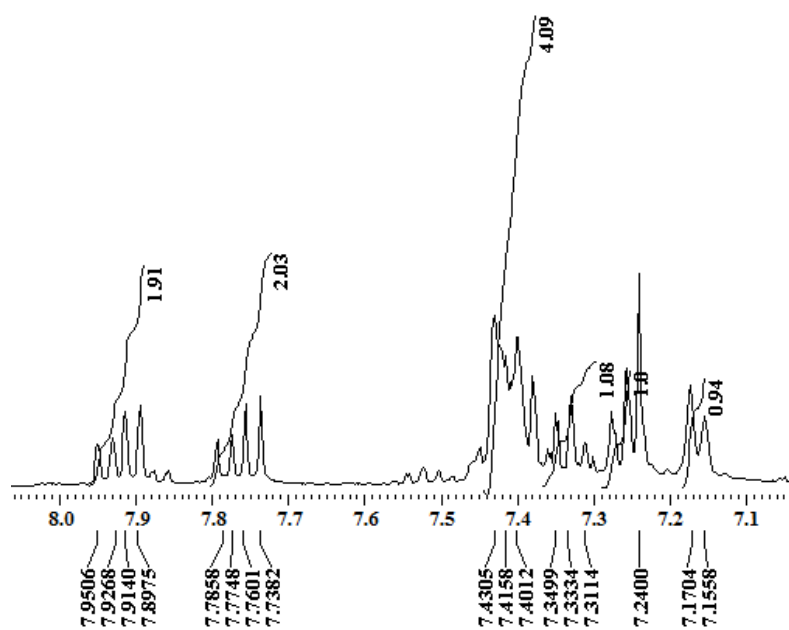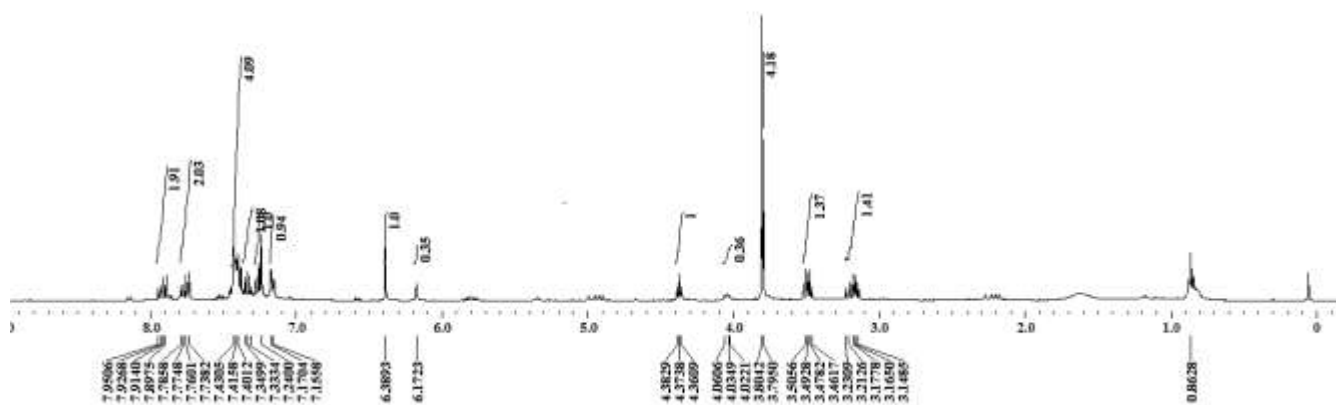

<sup>13</sup>C NMR

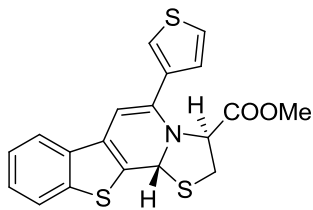

8d

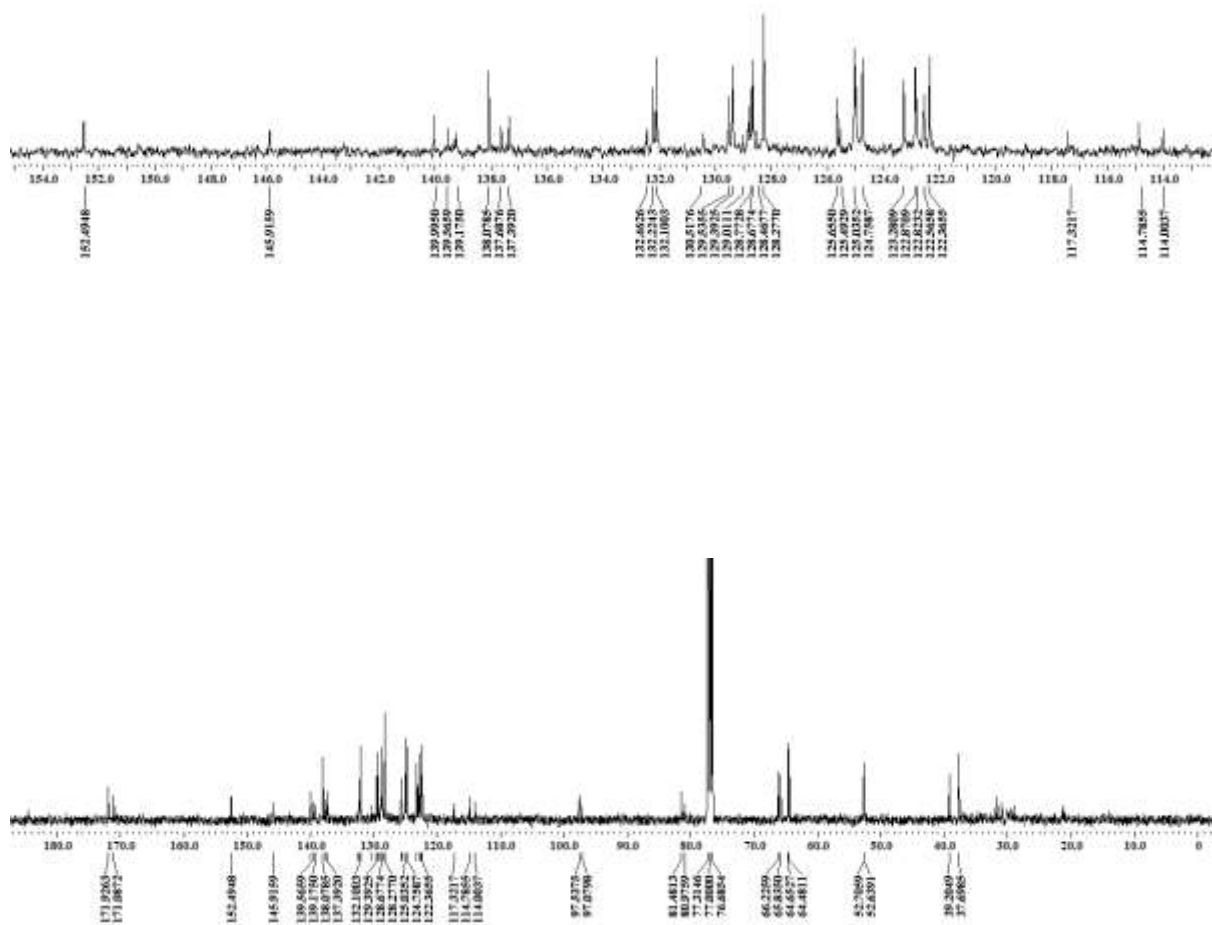

<sup>1</sup>H NMR

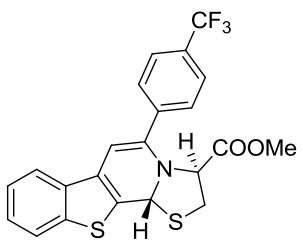

8e

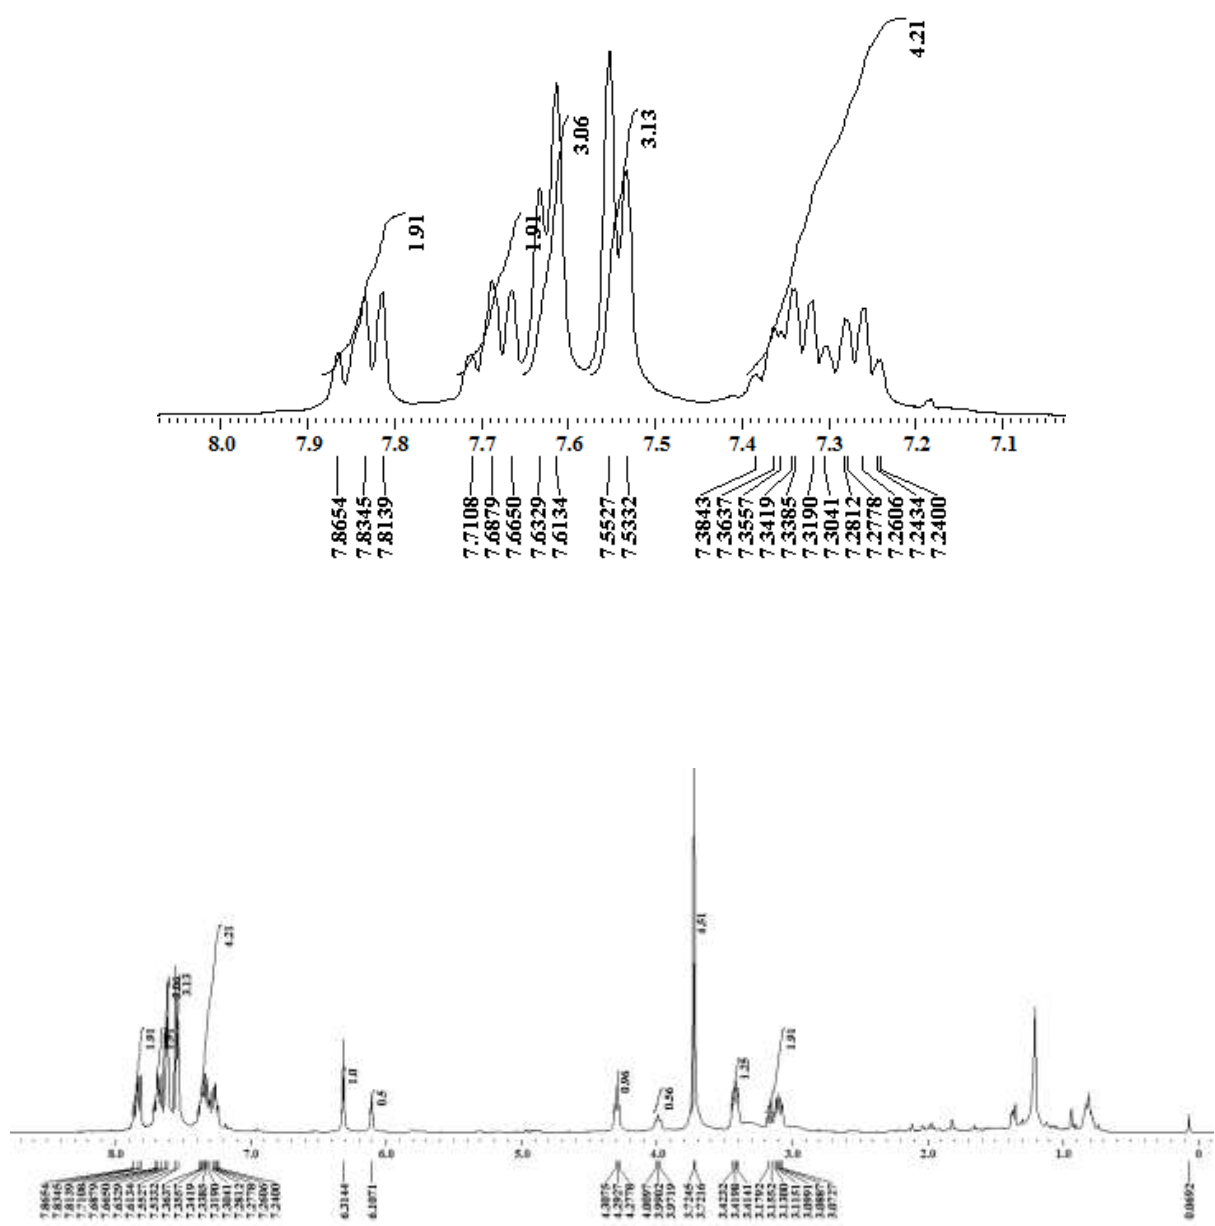

<sup>13</sup>C NMR

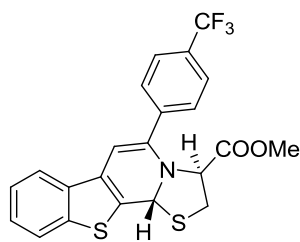

8e

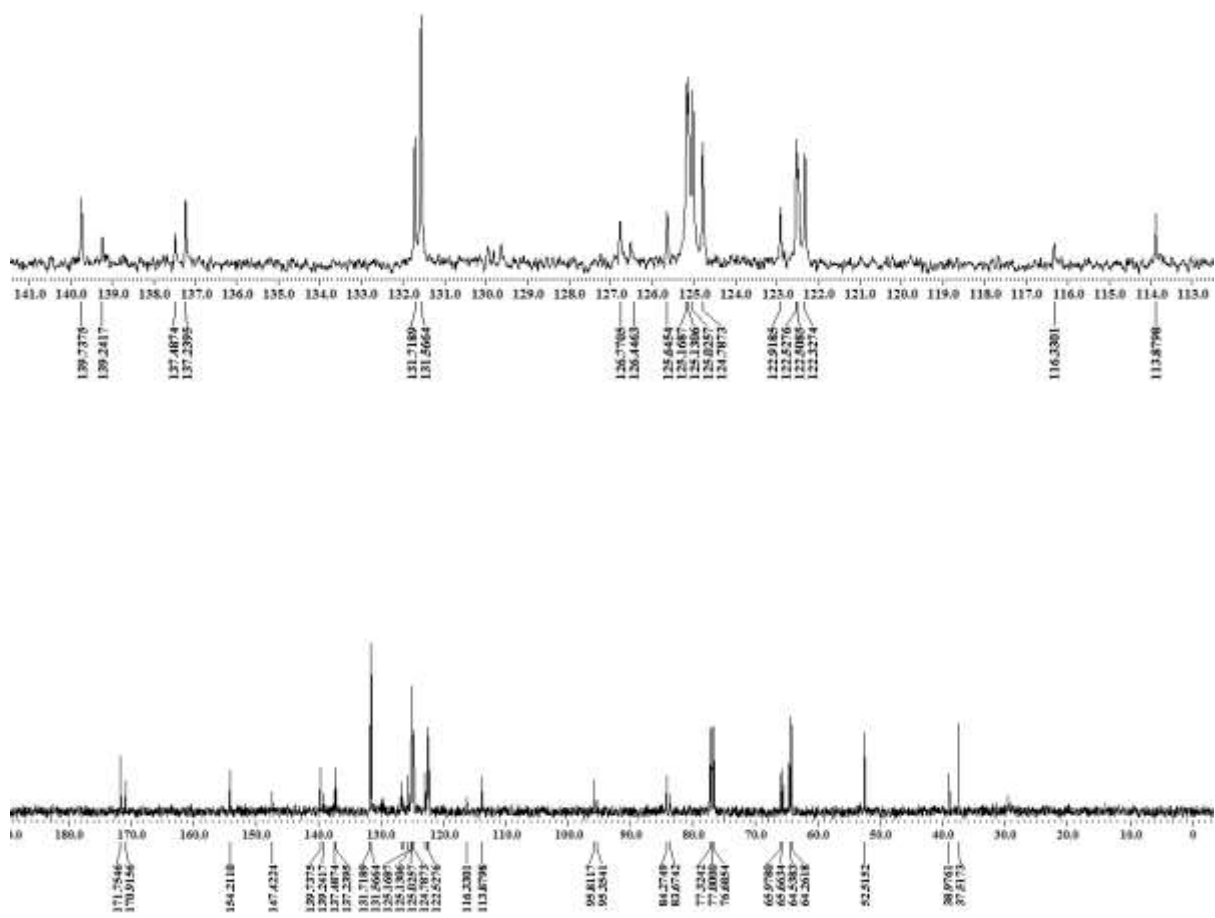

# NOESY

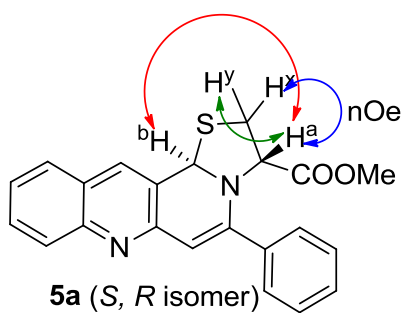

**5a (expanded form)**

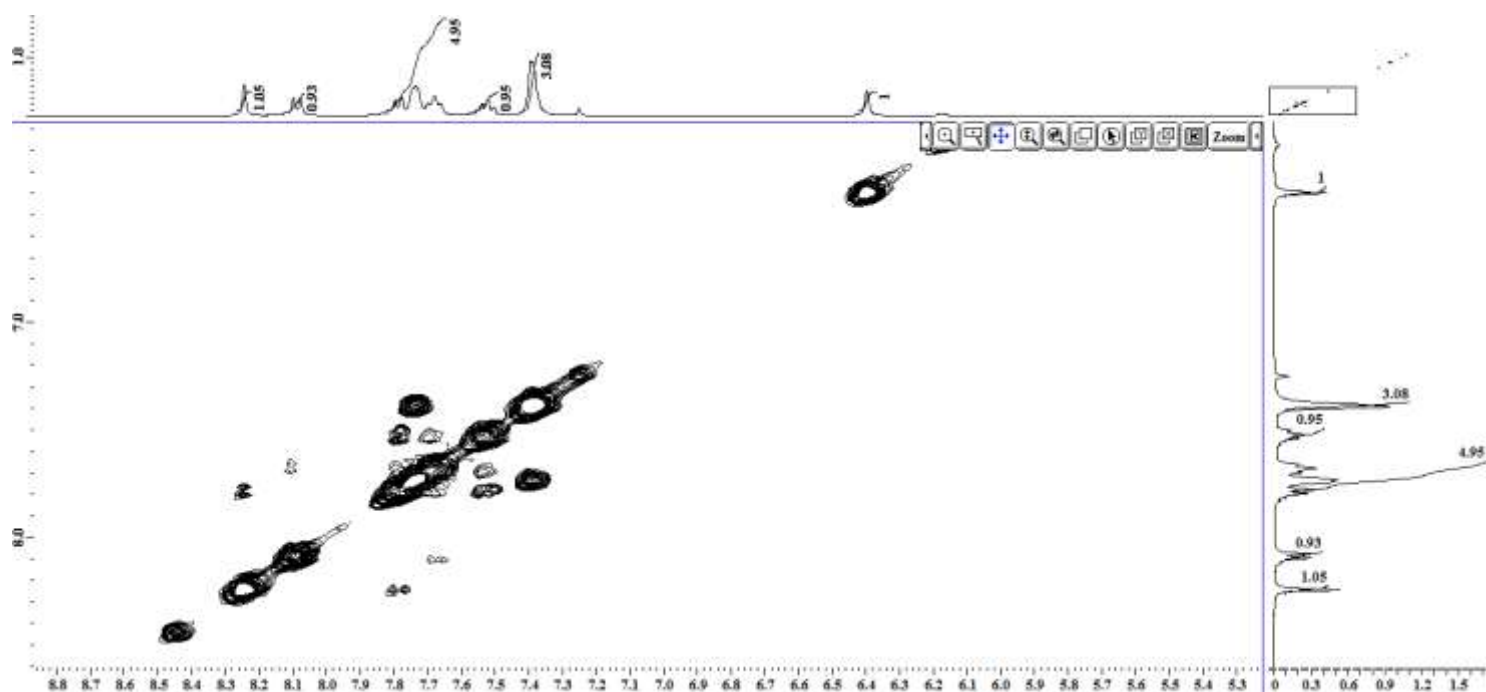

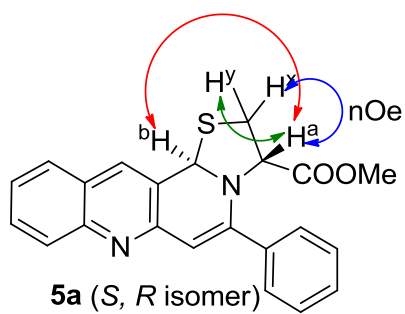

(Full View of NOESY Spectra of Compound **5a**)

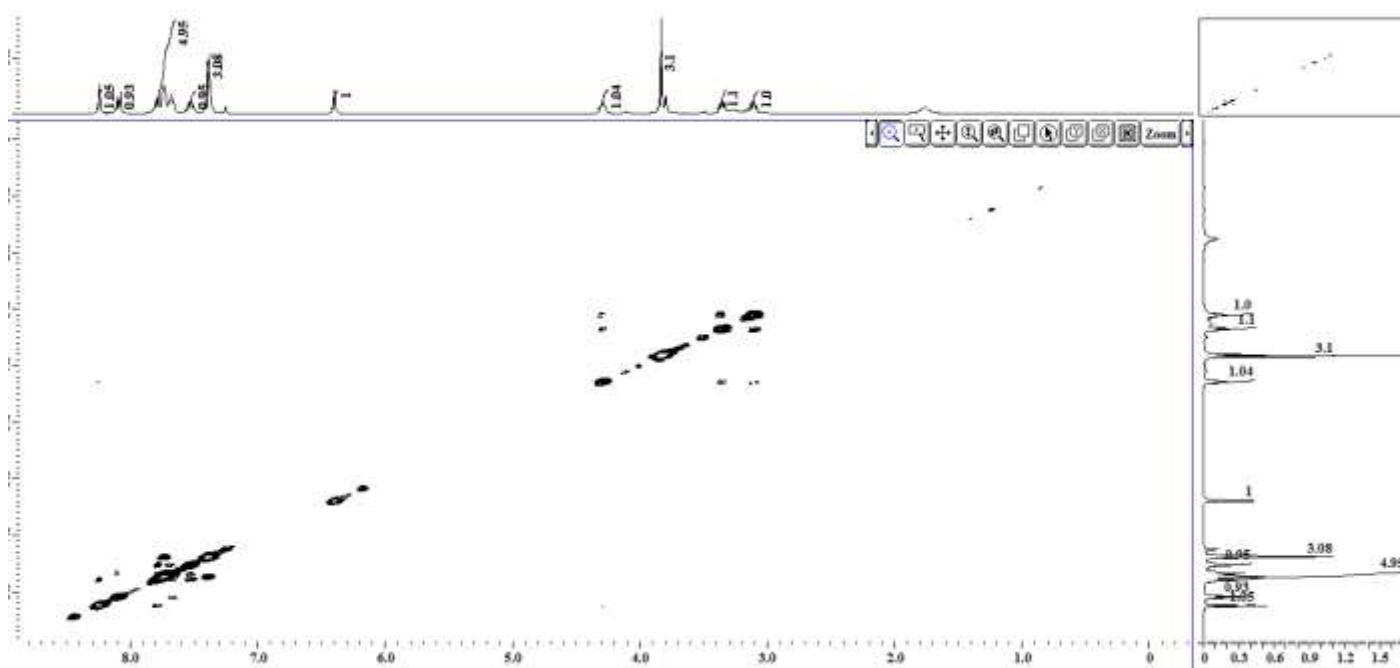

Supplement: c3ob42035c.pdf [file c3ob42035c.pdf]
